# Supplementary material for: Synthesis of Asebogenin and Balsacone A Precursor by a Novel Synthetic Strategy: Recent Opportunities for and Challenges of Total Synthesis of Balsacone A
Source: MDPI journal article supplement (doi:10.3390/molecules27113523), 2022-05-30
Supplement: s1 [file s1]

# Supporting information

## Synthesis of Asebogenin and Balsacone A Precursor by a Novel Synthetic Strategy: Recent Opportunities for and Challenges of Total Synthesis of Balsacone A

M. Fatih Polat<sup>a</sup>

<sup>a</sup>*Department of Pharmaceutical Basic Sciences, Faculty of Pharmacy, Erzincan Binali Yildirim University, Erzincan 24100, Turkey*

\*Corresponding author. E-mail: fpolat@erzincan.edu.tr

### Table of contents.

|                                                    |         |
|----------------------------------------------------|---------|
| <sup>1</sup> H NMR spectrum of compound <b>4</b>   | S3      |
| <sup>13</sup> C NMR spectrum of compound <b>4</b>  | S4      |
| <sup>1</sup> H NMR spectrum of compound <b>6a</b>  | S5      |
| <sup>13</sup> C NMR spectrum of compound <b>6a</b> | S6      |
| <sup>1</sup> H NMR spectrum of compound <b>7</b>   | S7      |
| <sup>13</sup> C NMR spectrum of compound <b>7</b>  | S8      |
| <sup>1</sup> H NMR spectrum of compound <b>8</b>   | S9      |
| <sup>13</sup> C NMR spectrum of compound <b>8</b>  | S10     |
| <sup>1</sup> H NMR spectrum of compound <b>9a</b>  | S11     |
| <sup>13</sup> C NMR spectrum of compound <b>9a</b> | S12     |
| <sup>1</sup> H NMR spectrum of compound <b>9b</b>  | S13     |
| <sup>13</sup> C NMR spectrum of compound <b>9b</b> | S14     |
| <sup>1</sup> H NMR spectrum of compound <b>10</b>  | S15     |
| <sup>13</sup> C NMR spectrum of compound <b>10</b> | S16     |
| <sup>1</sup> H NMR spectrum of compound <b>12</b>  | S17     |
| <sup>13</sup> C NMR spectrum of compound <b>12</b> | S18     |
| <sup>1</sup> H NMR spectrum of compound <b>14</b>  | S19     |
| <sup>13</sup> C NMR spectrum of compound <b>14</b> | S20     |
| HRMS Spectra of compound <b>4</b>                  | S21-S23 |
| HRMS Spectra of compound <b>6a</b>                 | S24-S26 |
| HRMS Spectra of compound <b>7</b>                  | S27-S29 |
| HRMS Spectra of compound <b>8</b>                  | S30-S32 |
| HRMS Spectra of compound <b>9a</b>                 | S33-S35 |

|                                    |         |
|------------------------------------|---------|
| HRMS Spectra of compound <b>9b</b> | S36-S38 |
| HRMS Spectra of compound <b>10</b> | S39-S41 |
| HRMS Spectra of compound <b>12</b> | S42-S44 |
| HRMS Spectra of compound <b>14</b> | S45-S47 |

<sup>1</sup>H NMR spectrum of compound **4**

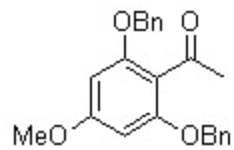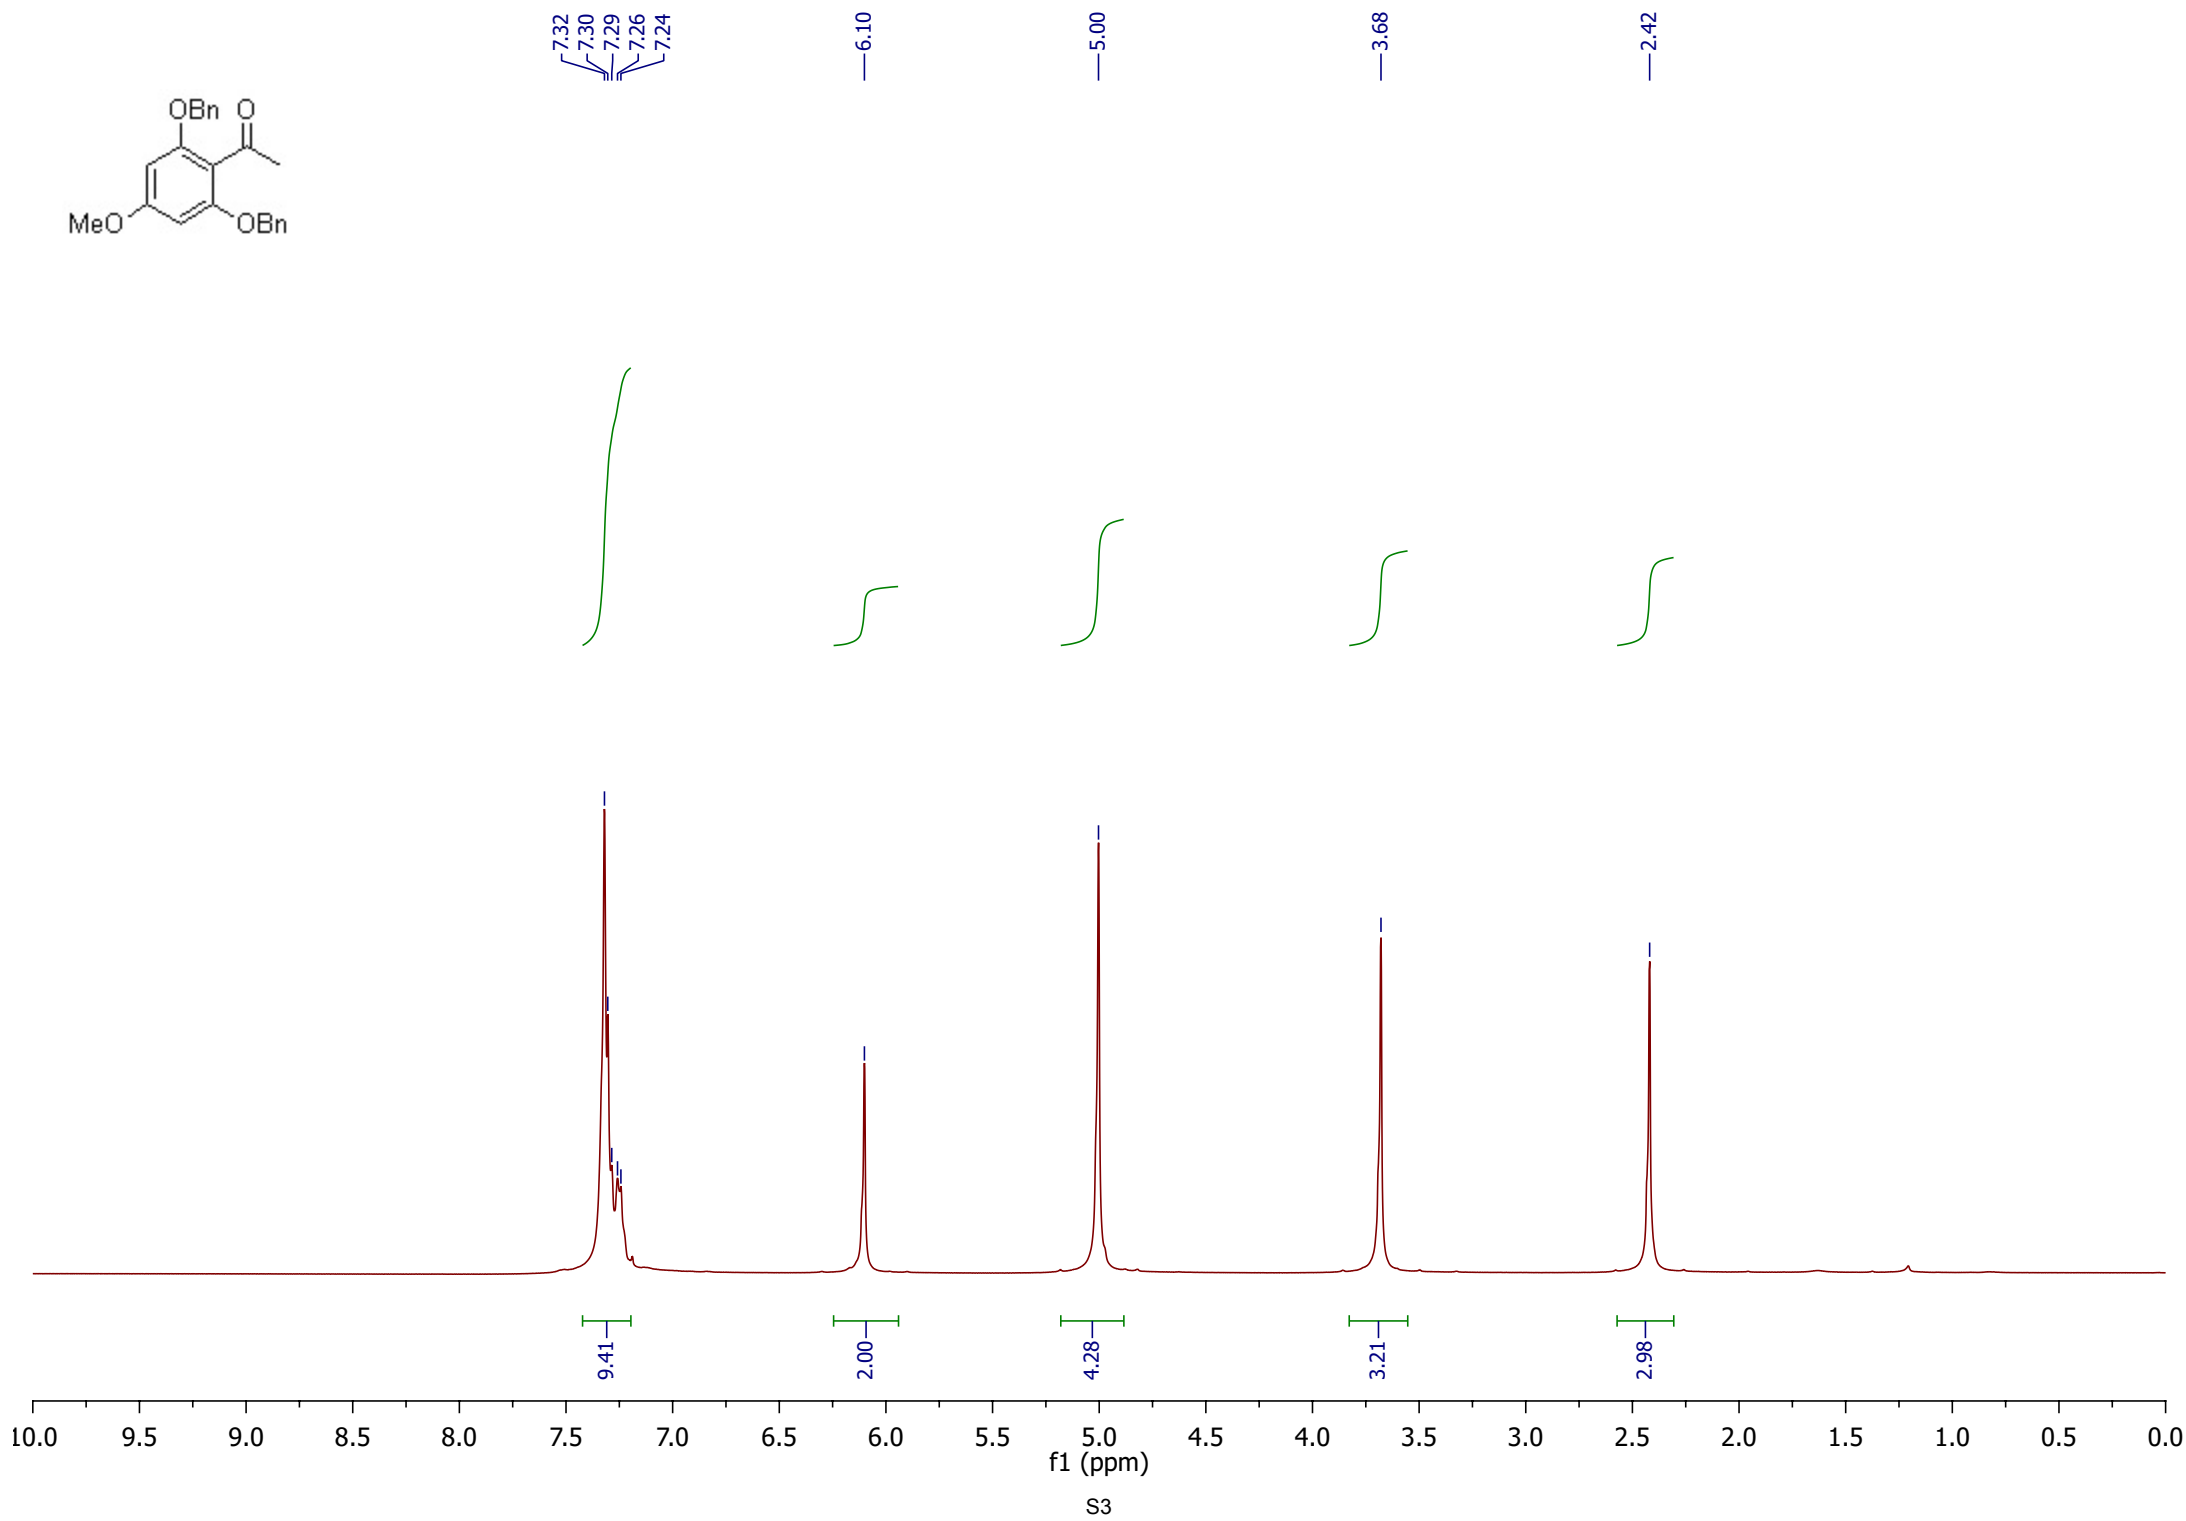

<sup>13</sup>C NMR spectrum of compound **4**

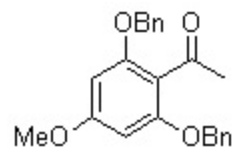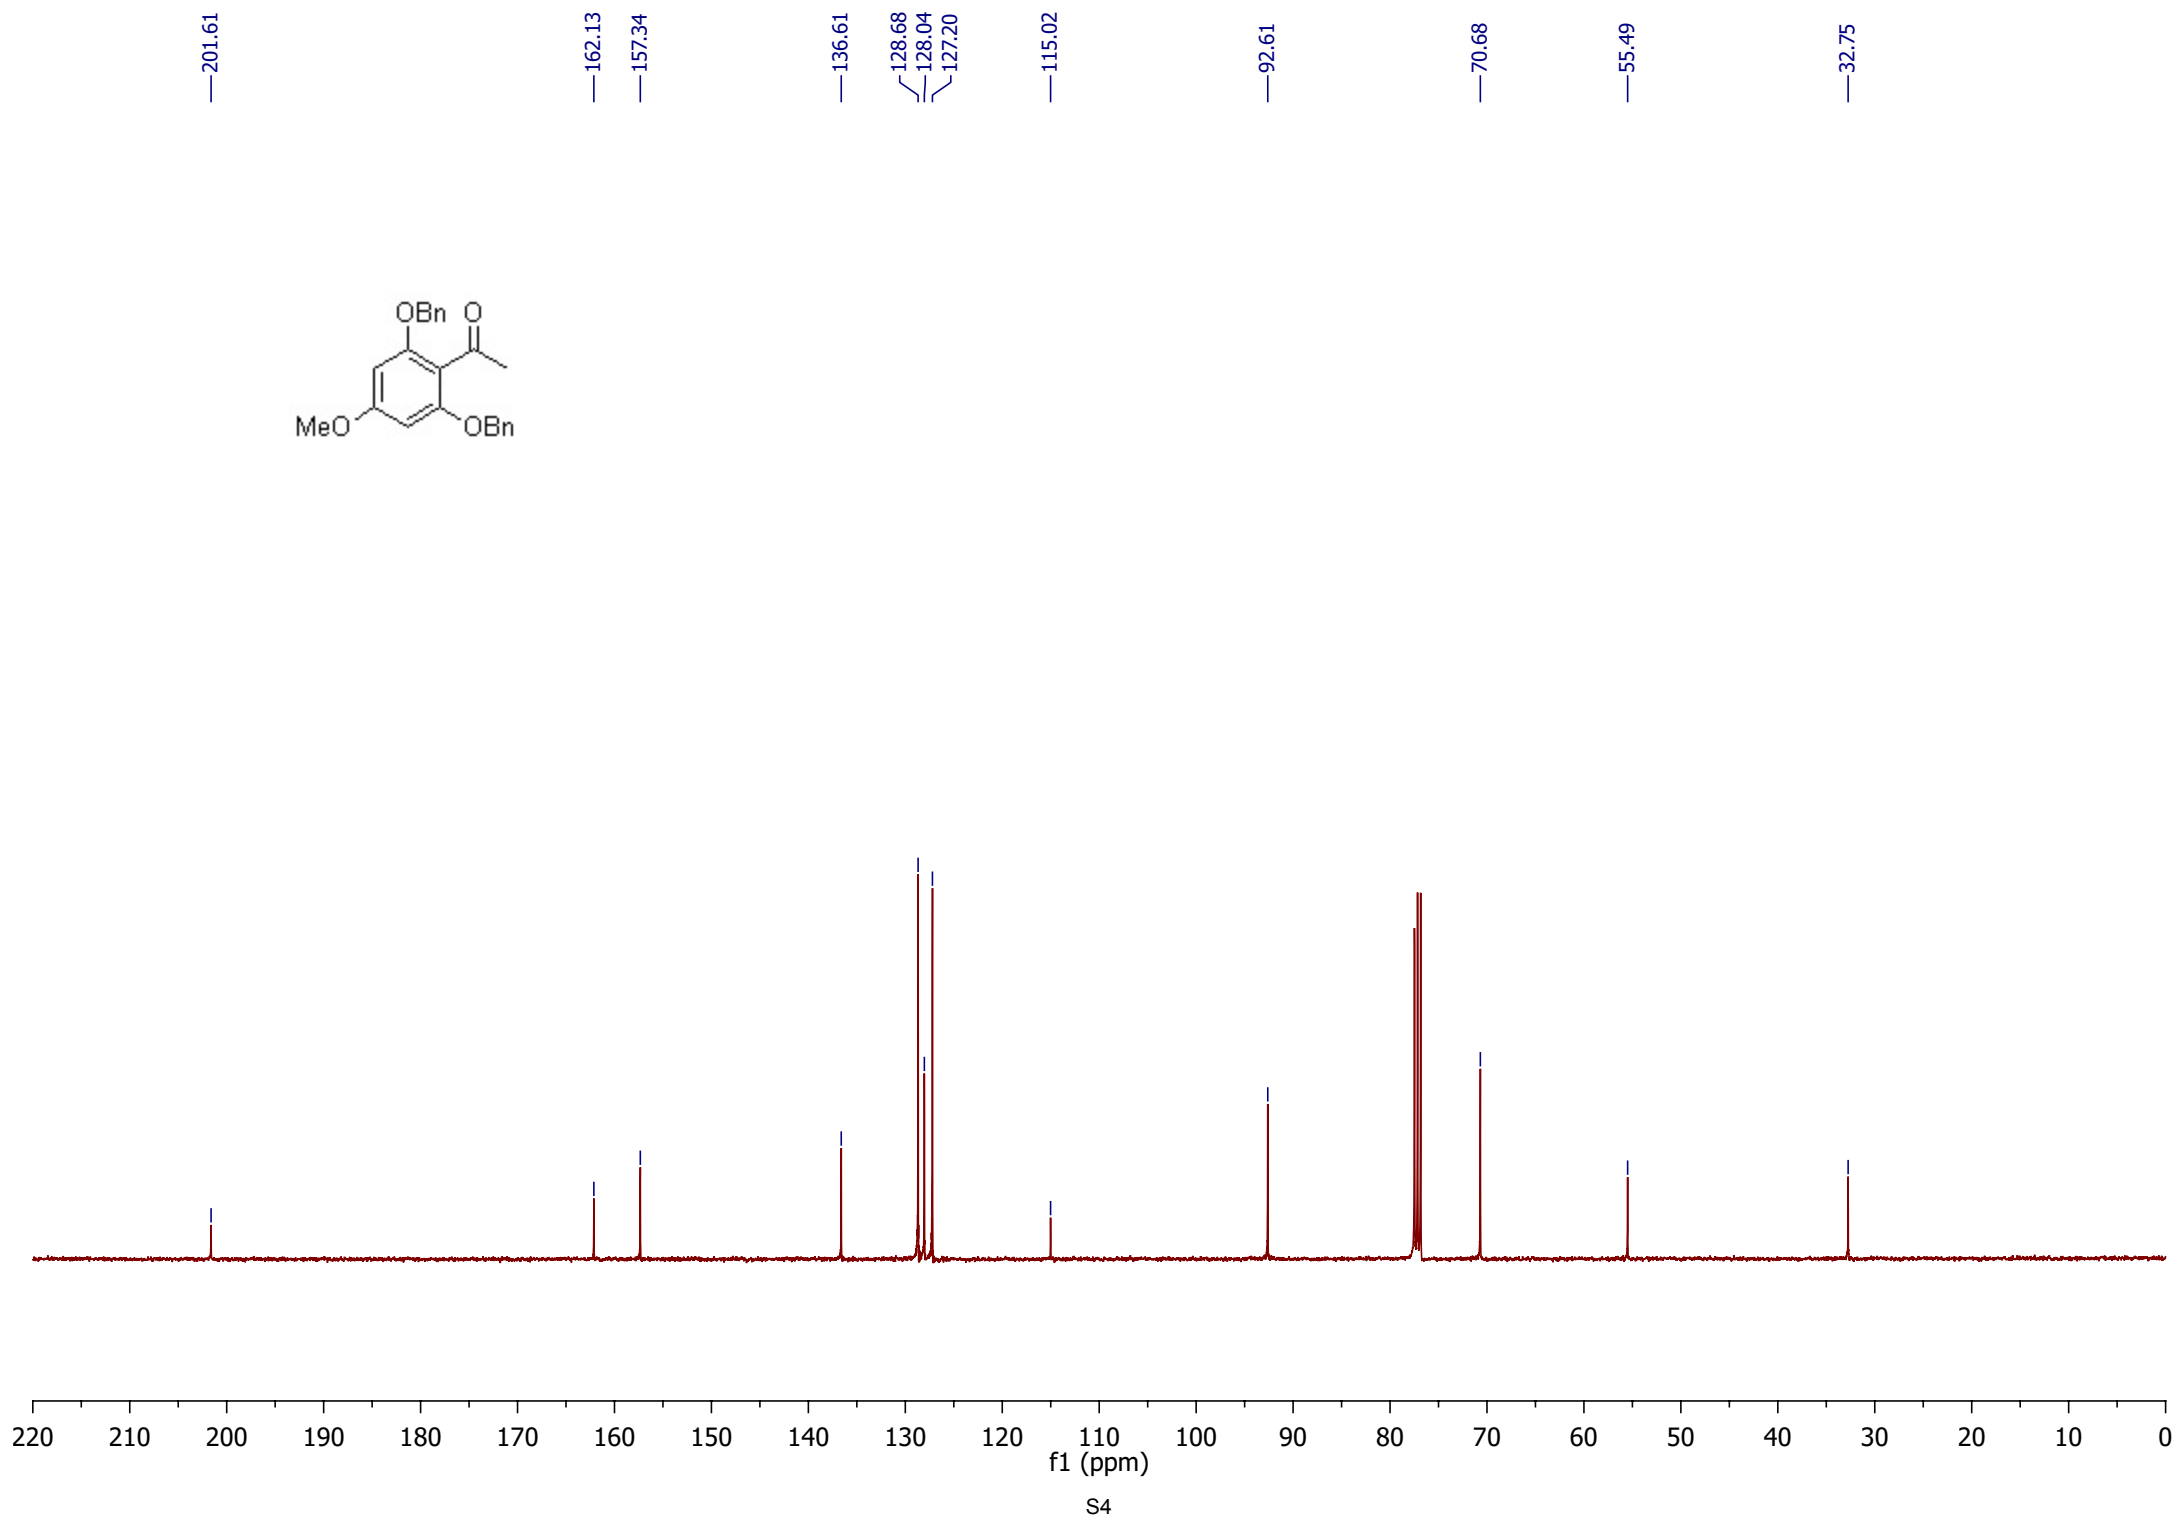

<sup>1</sup>H NMR spectrum of compound **6a**

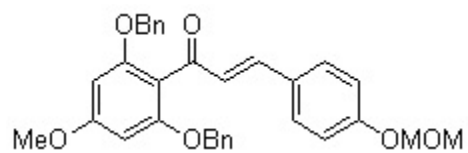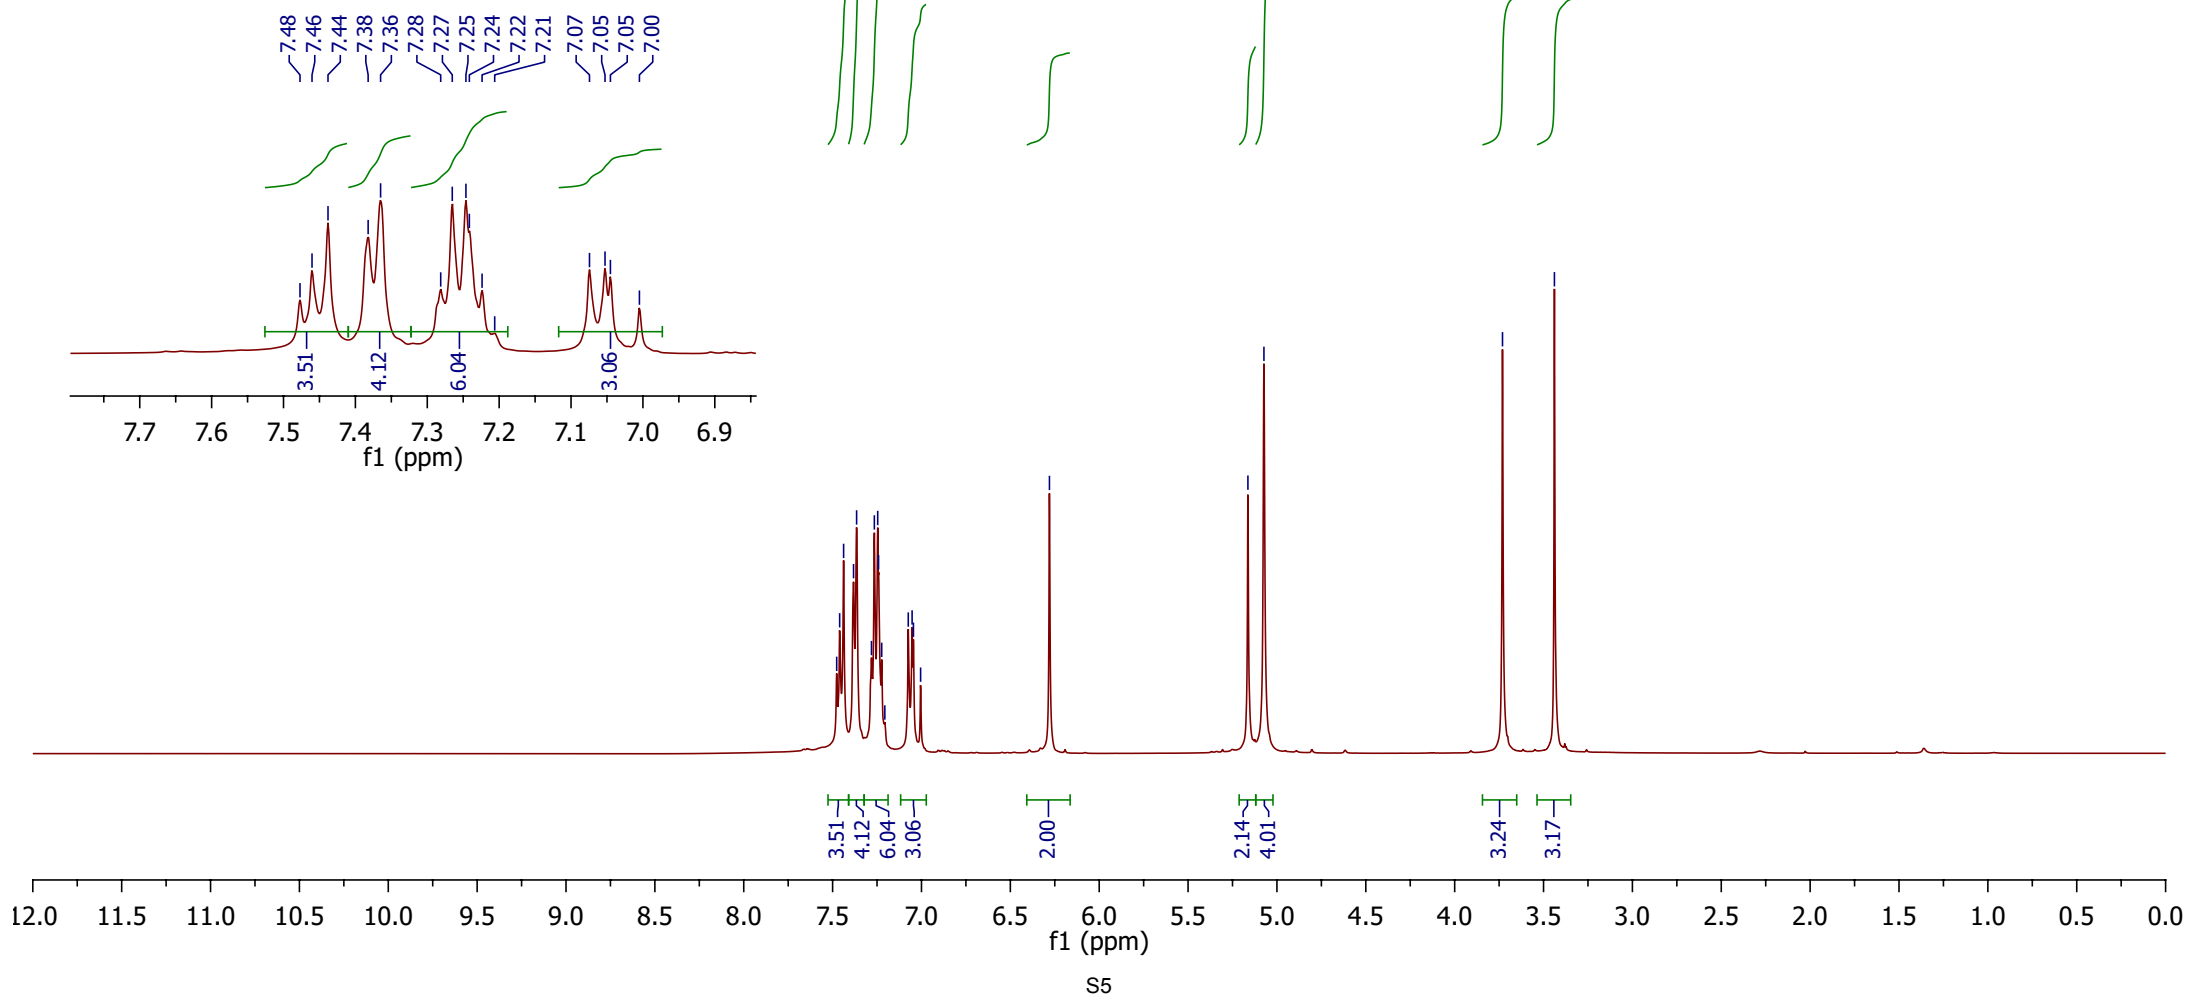

<sup>13</sup>C NMR spectrum of compound **6a**

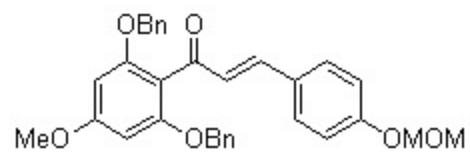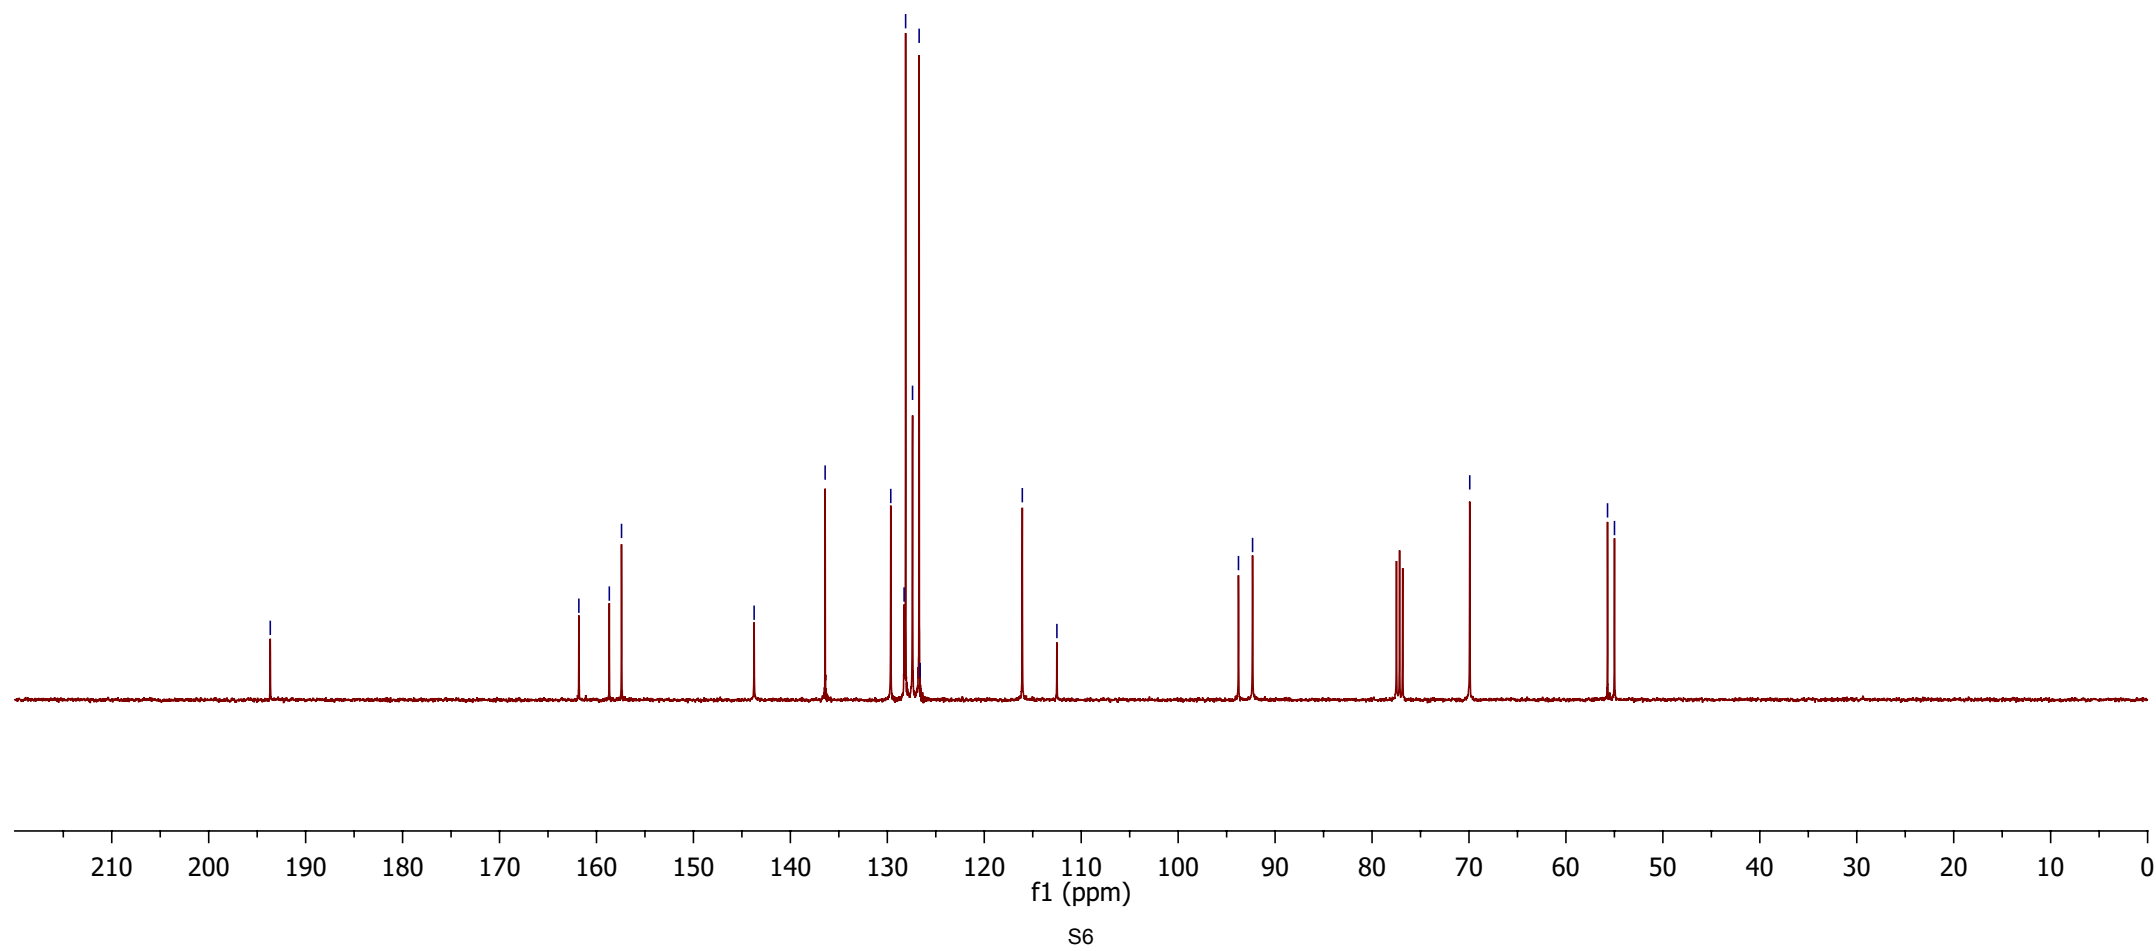

<sup>1</sup>H NMR spectrum of compound 7

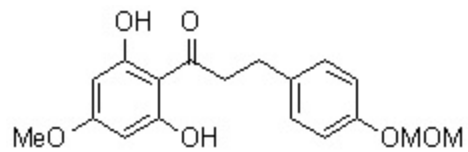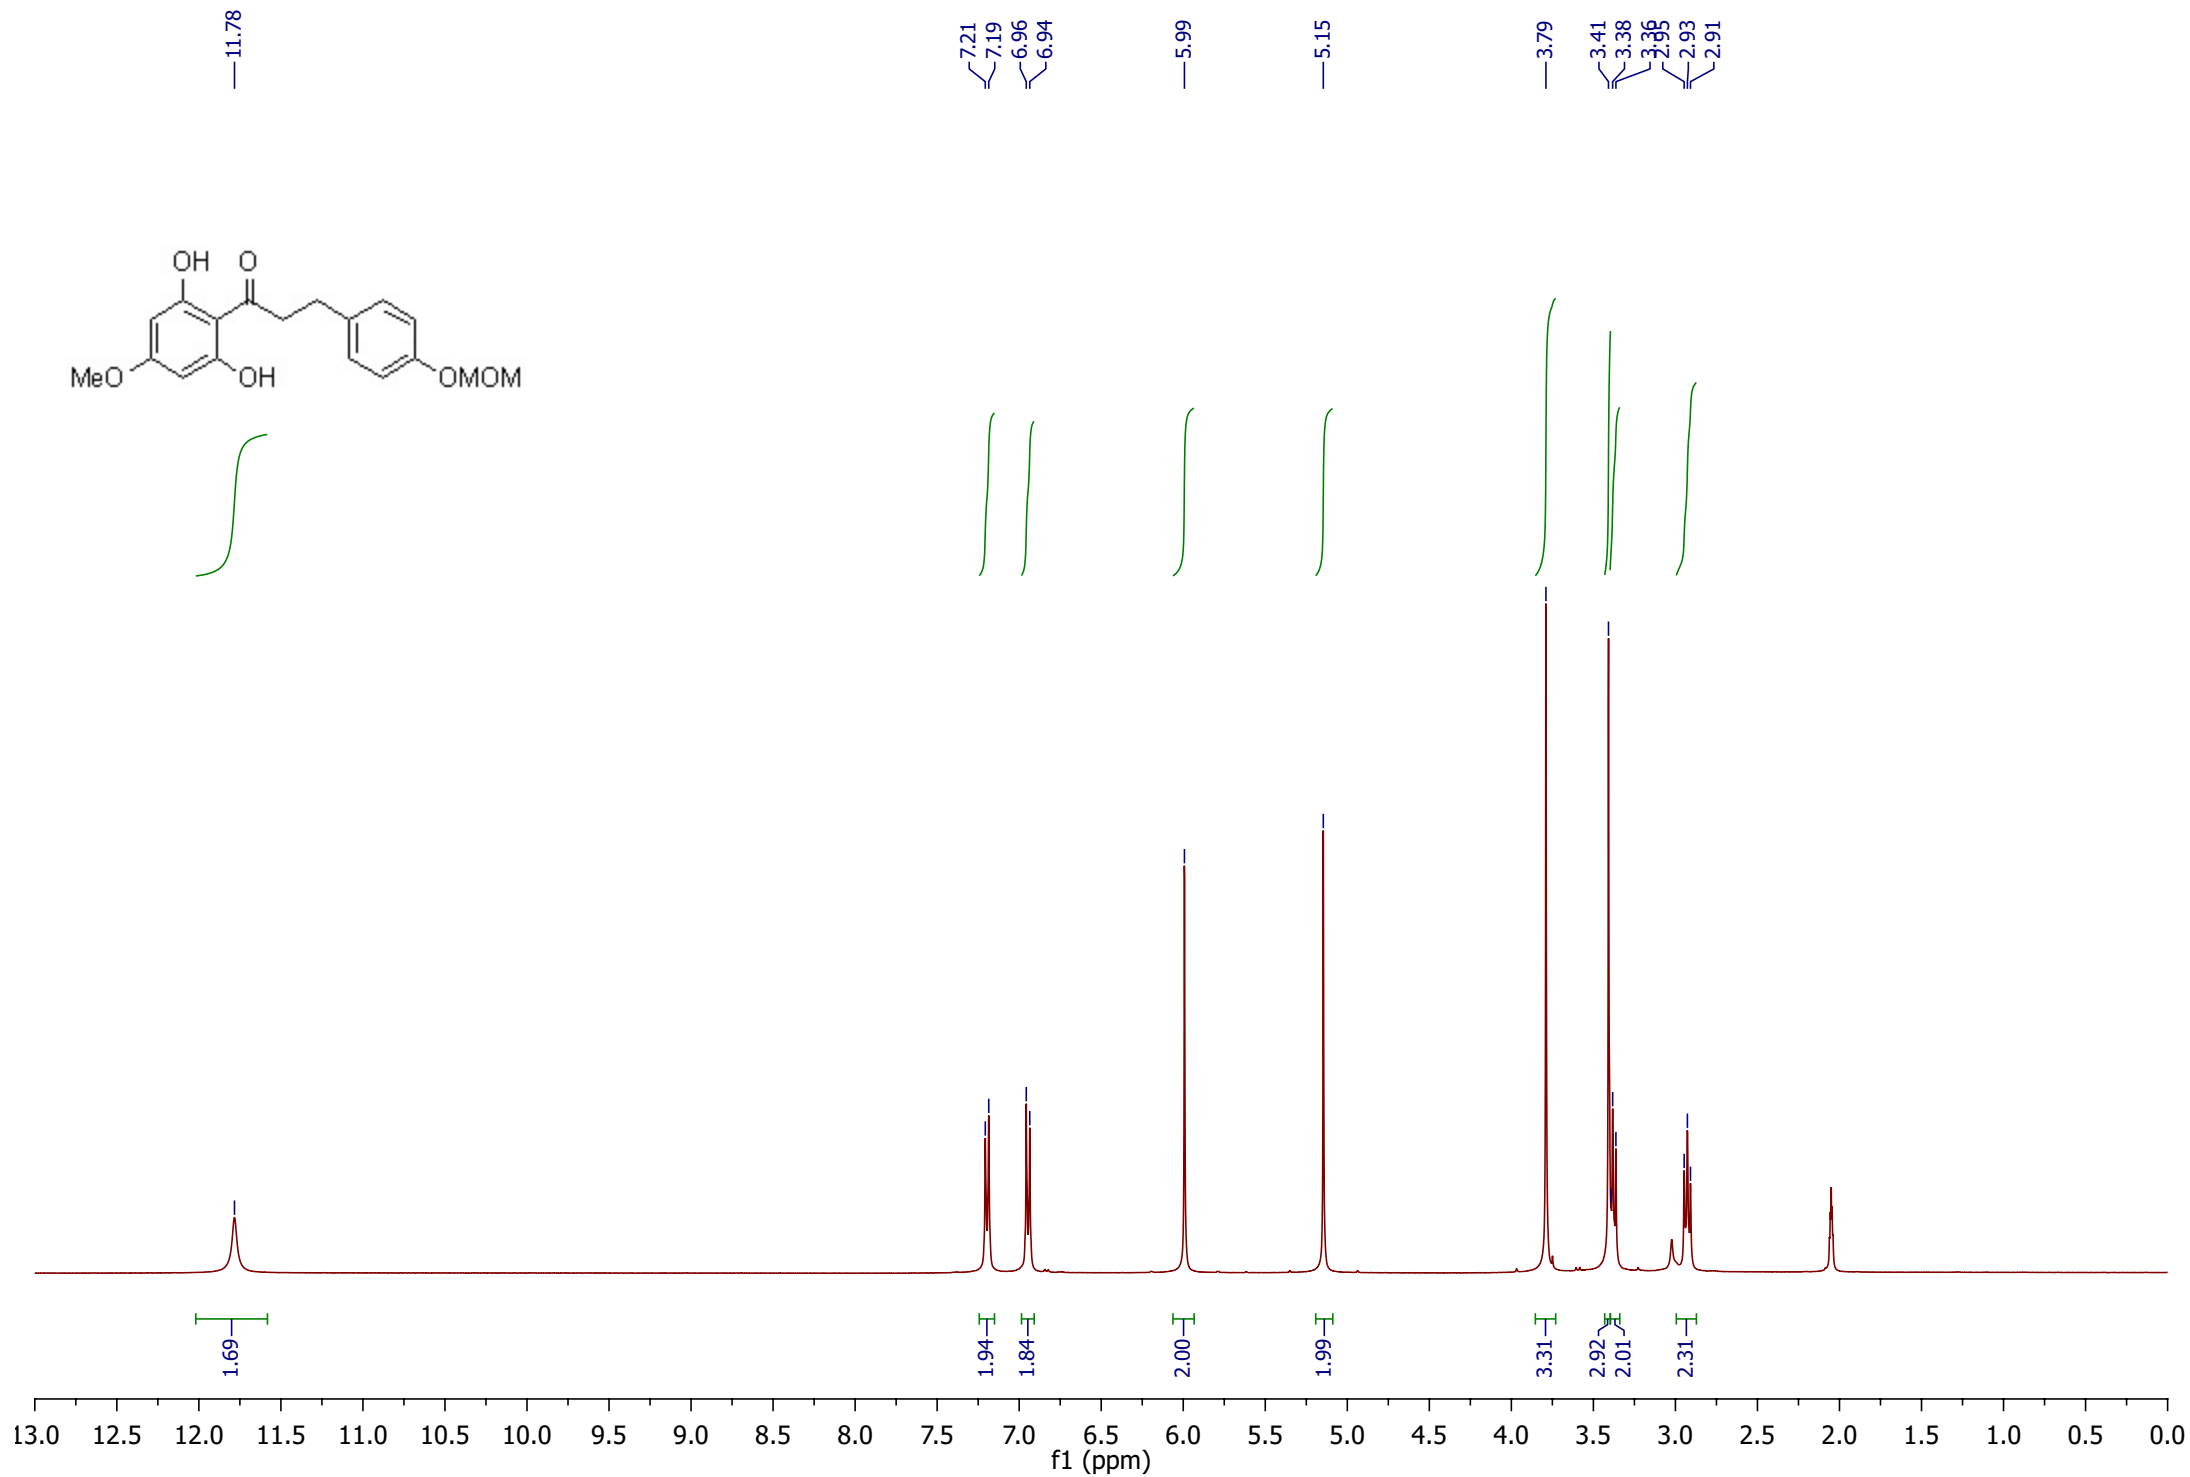

<sup>13</sup>C NMR spectrum of compound **7**

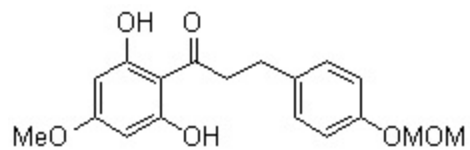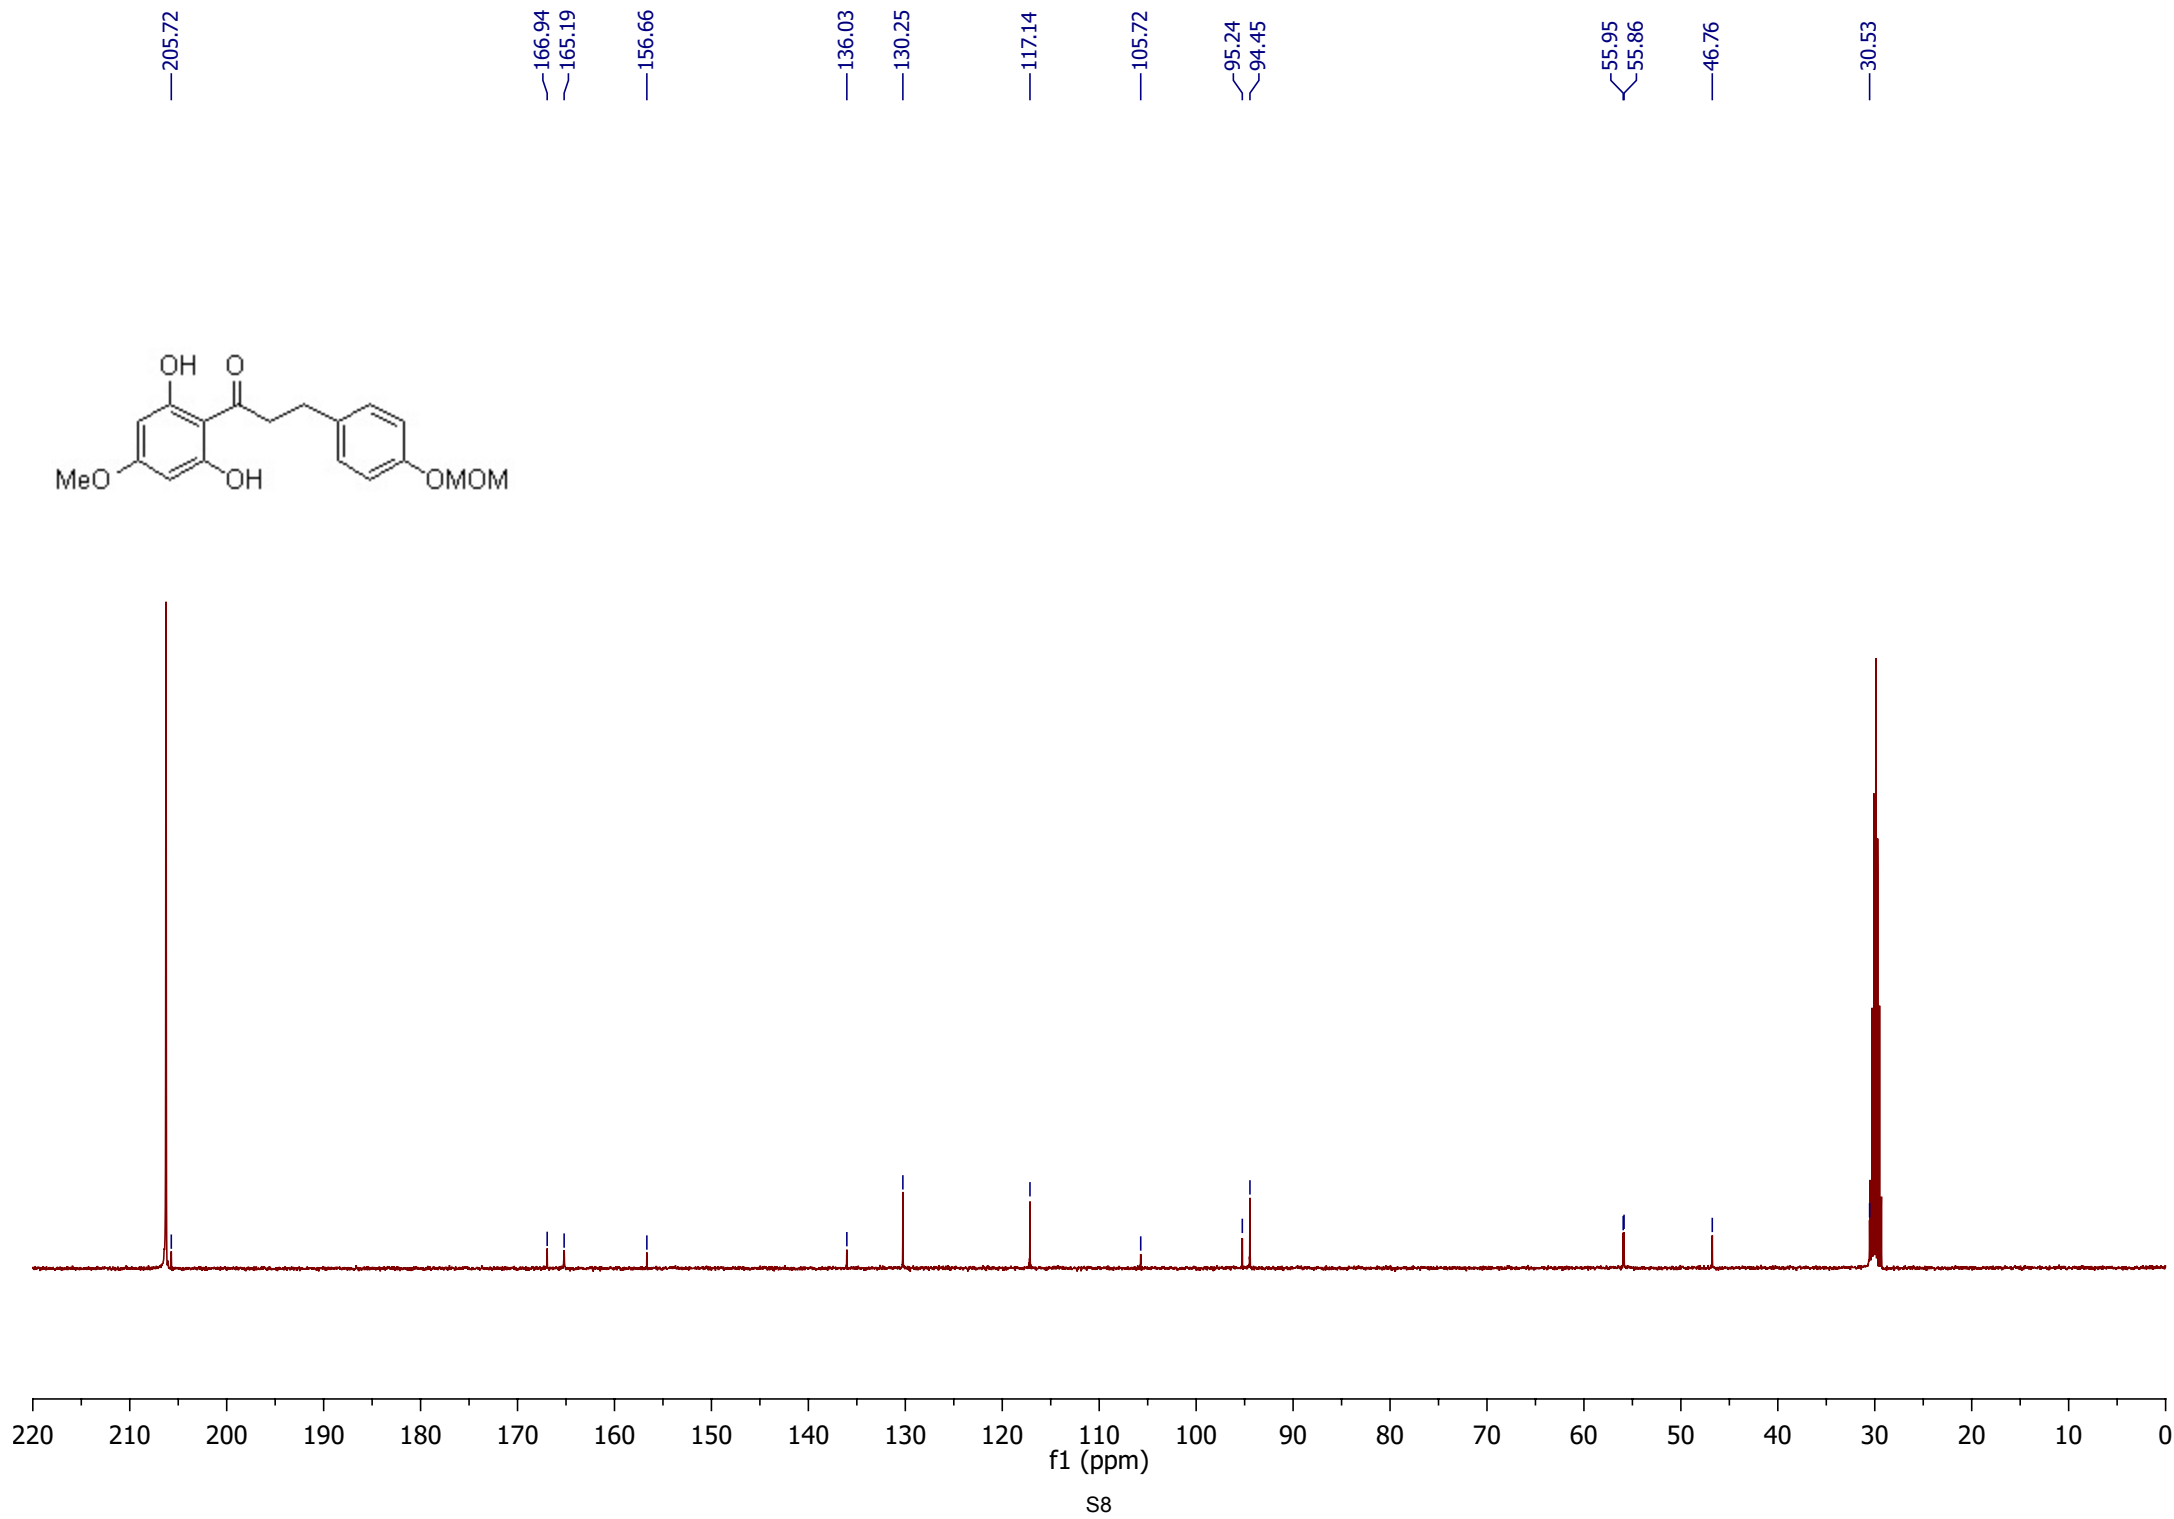



<sup>1</sup>H NMR spectrum of compound **8**

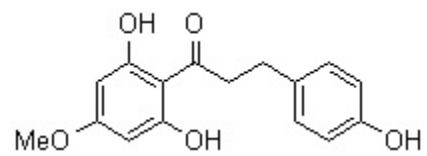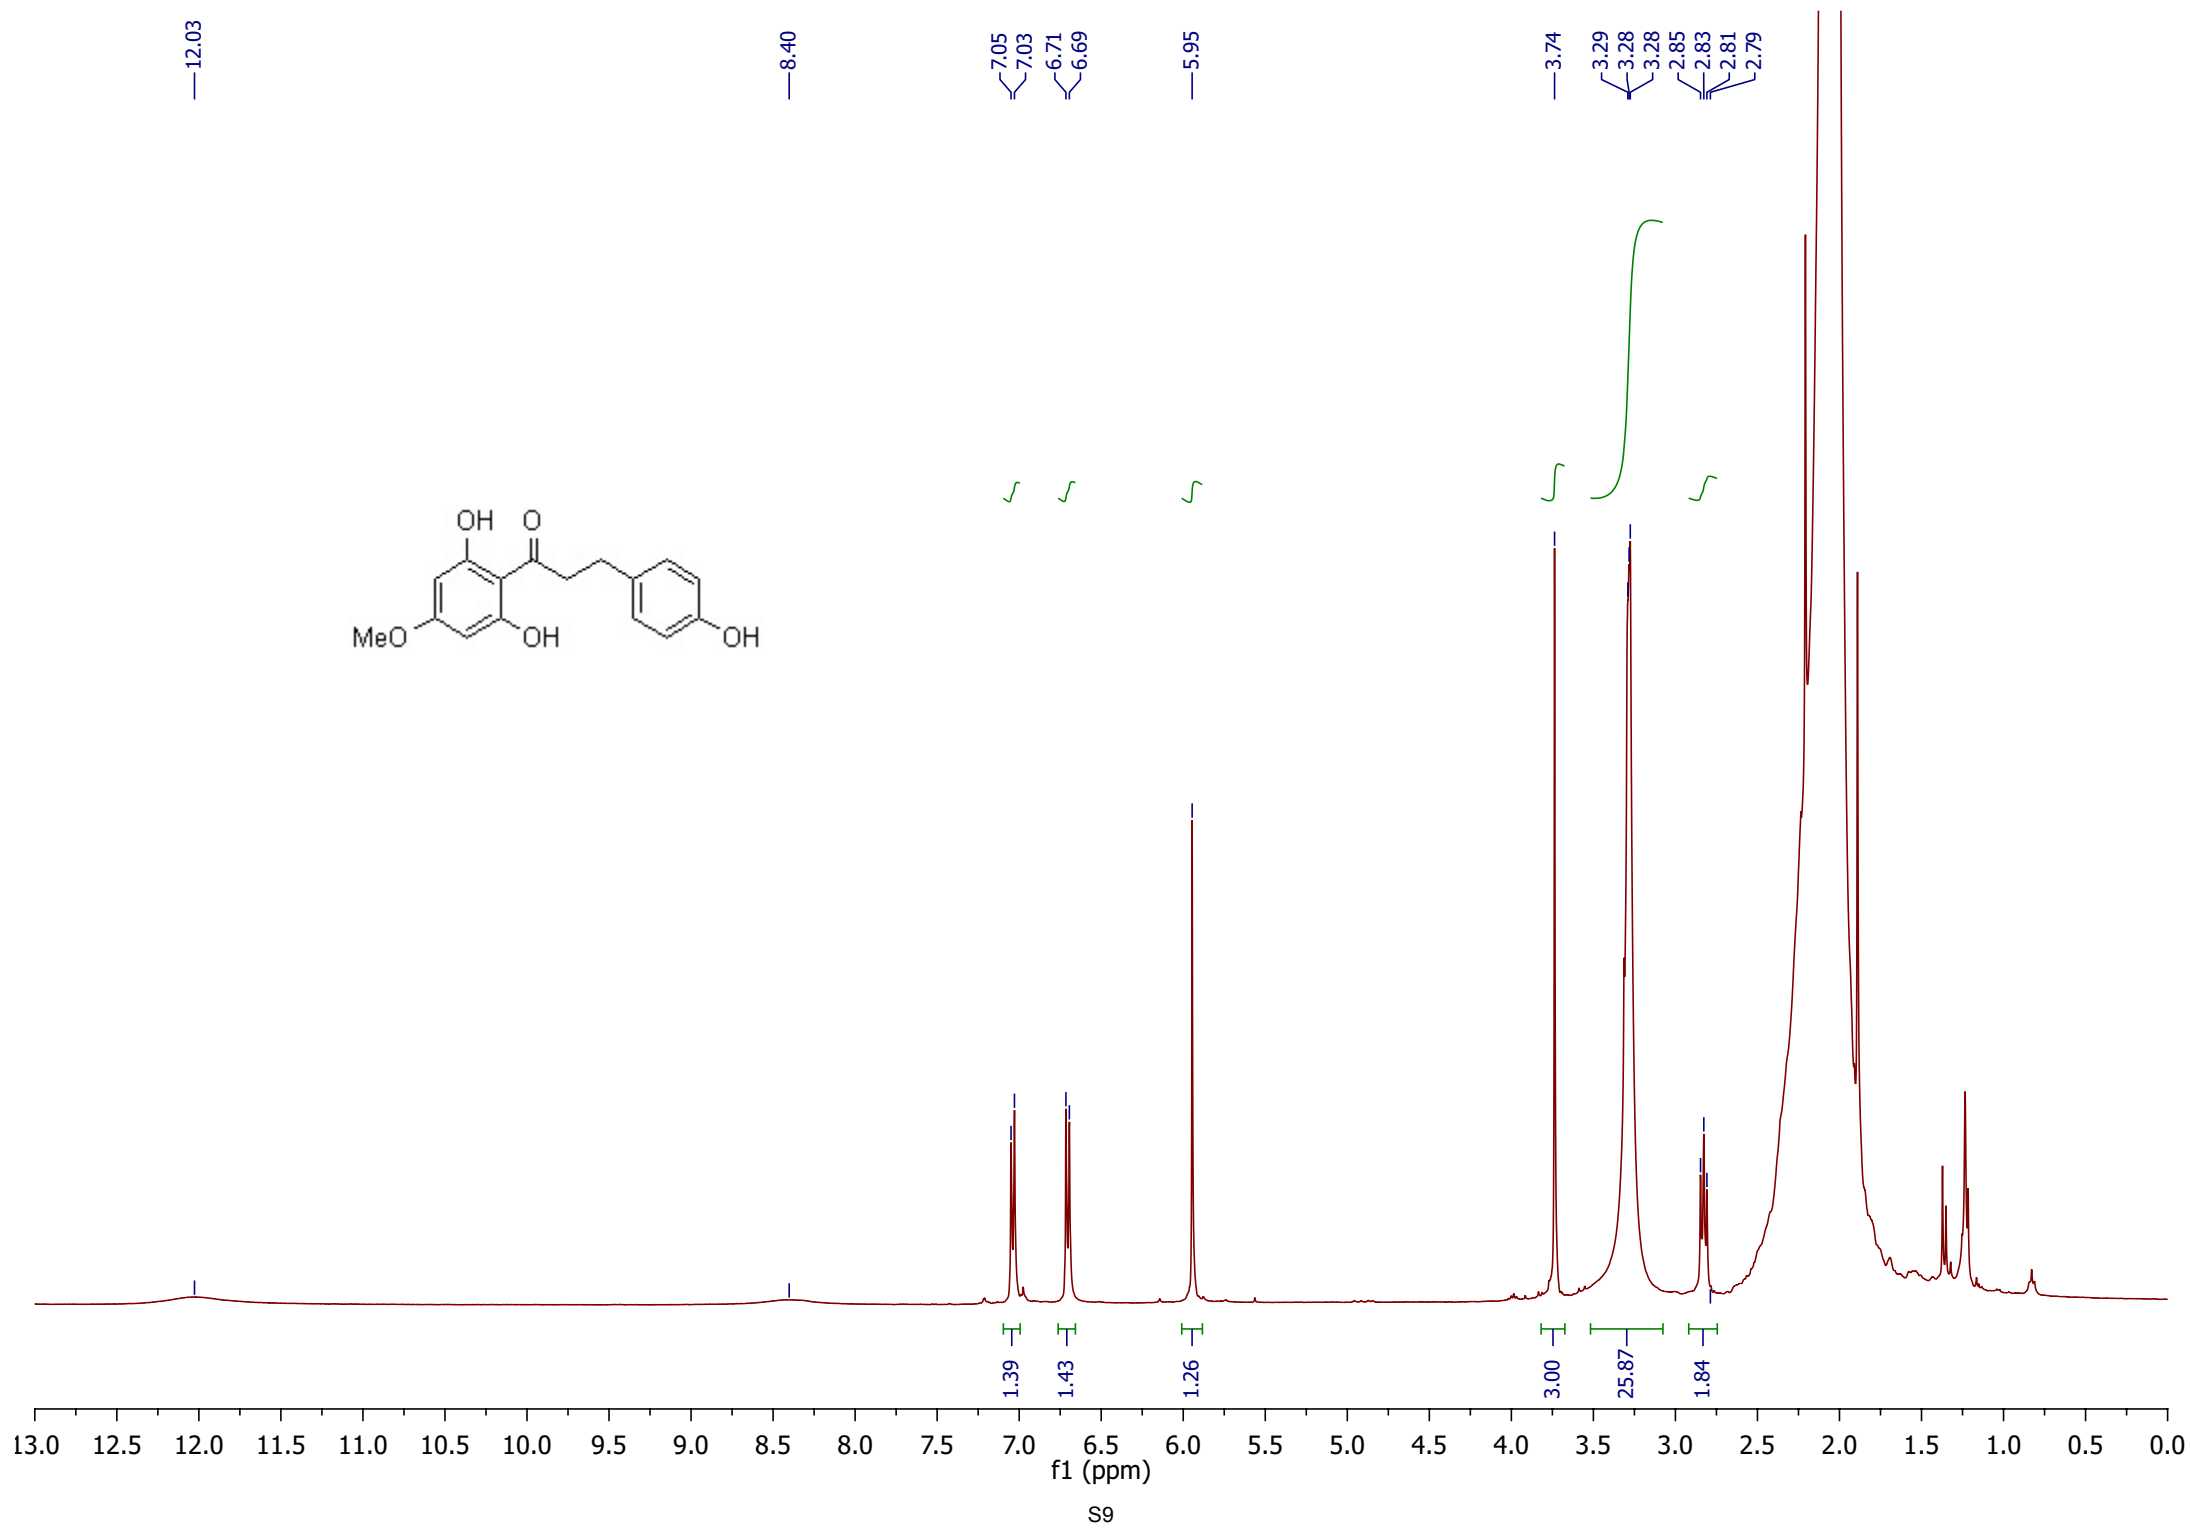

<sup>13</sup>C NMR spectrum of compound **8**

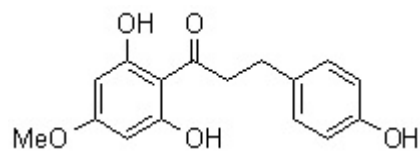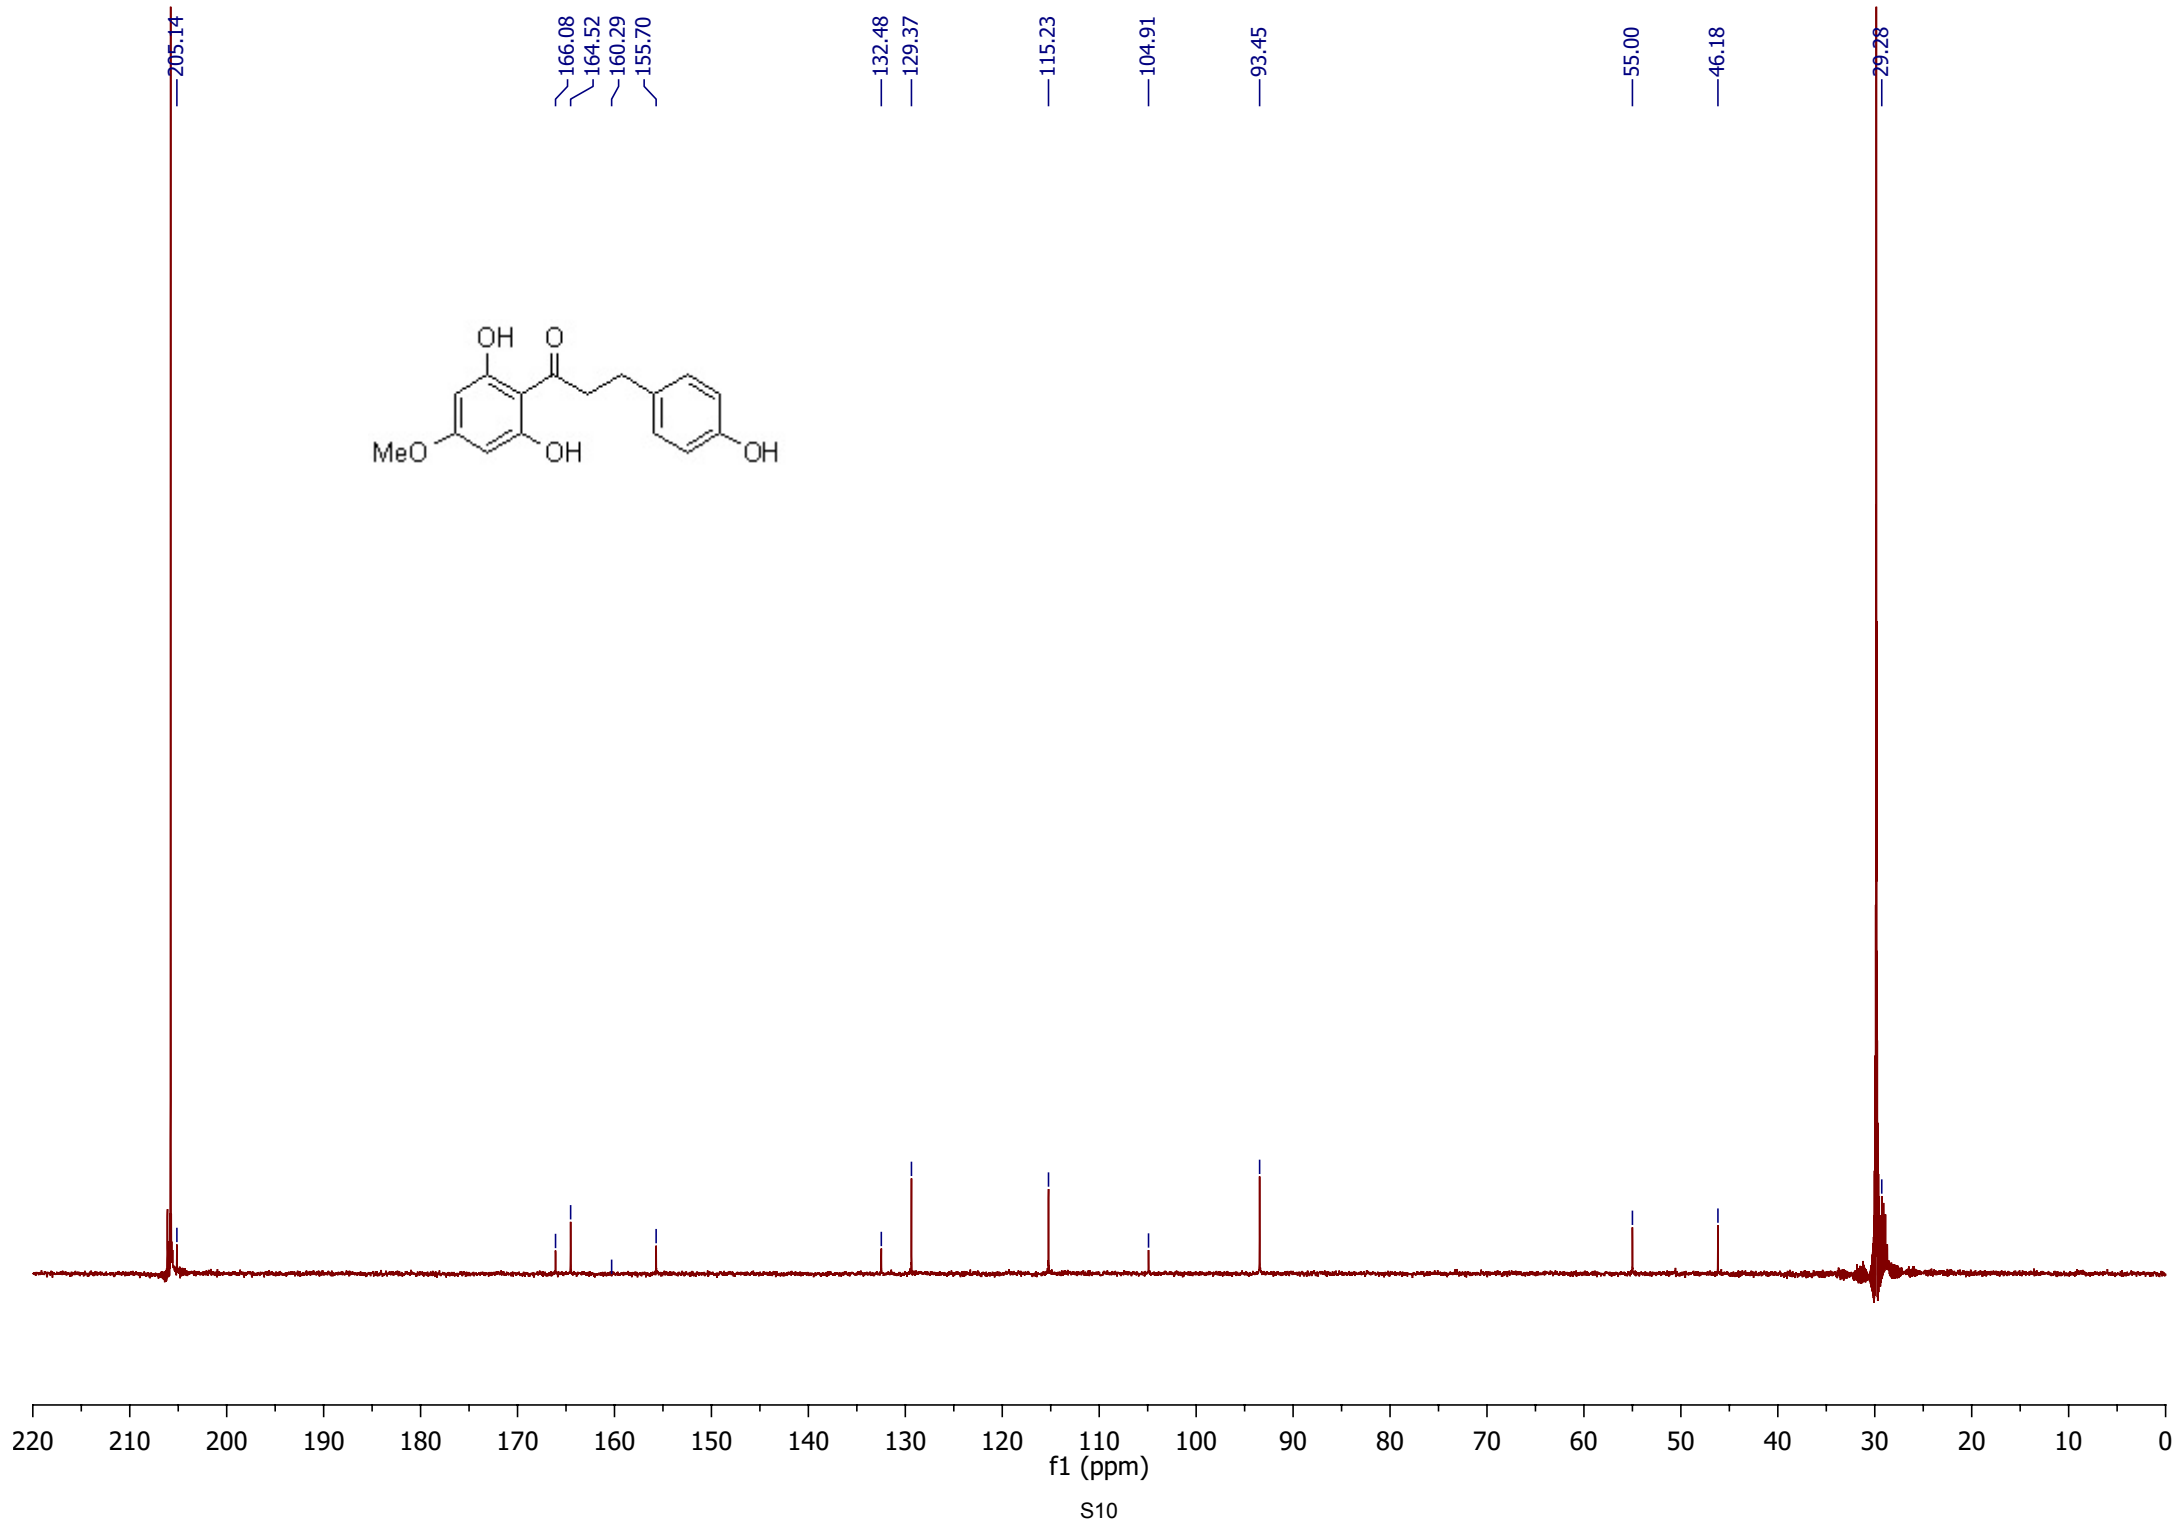

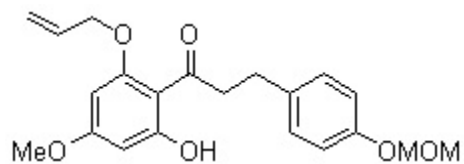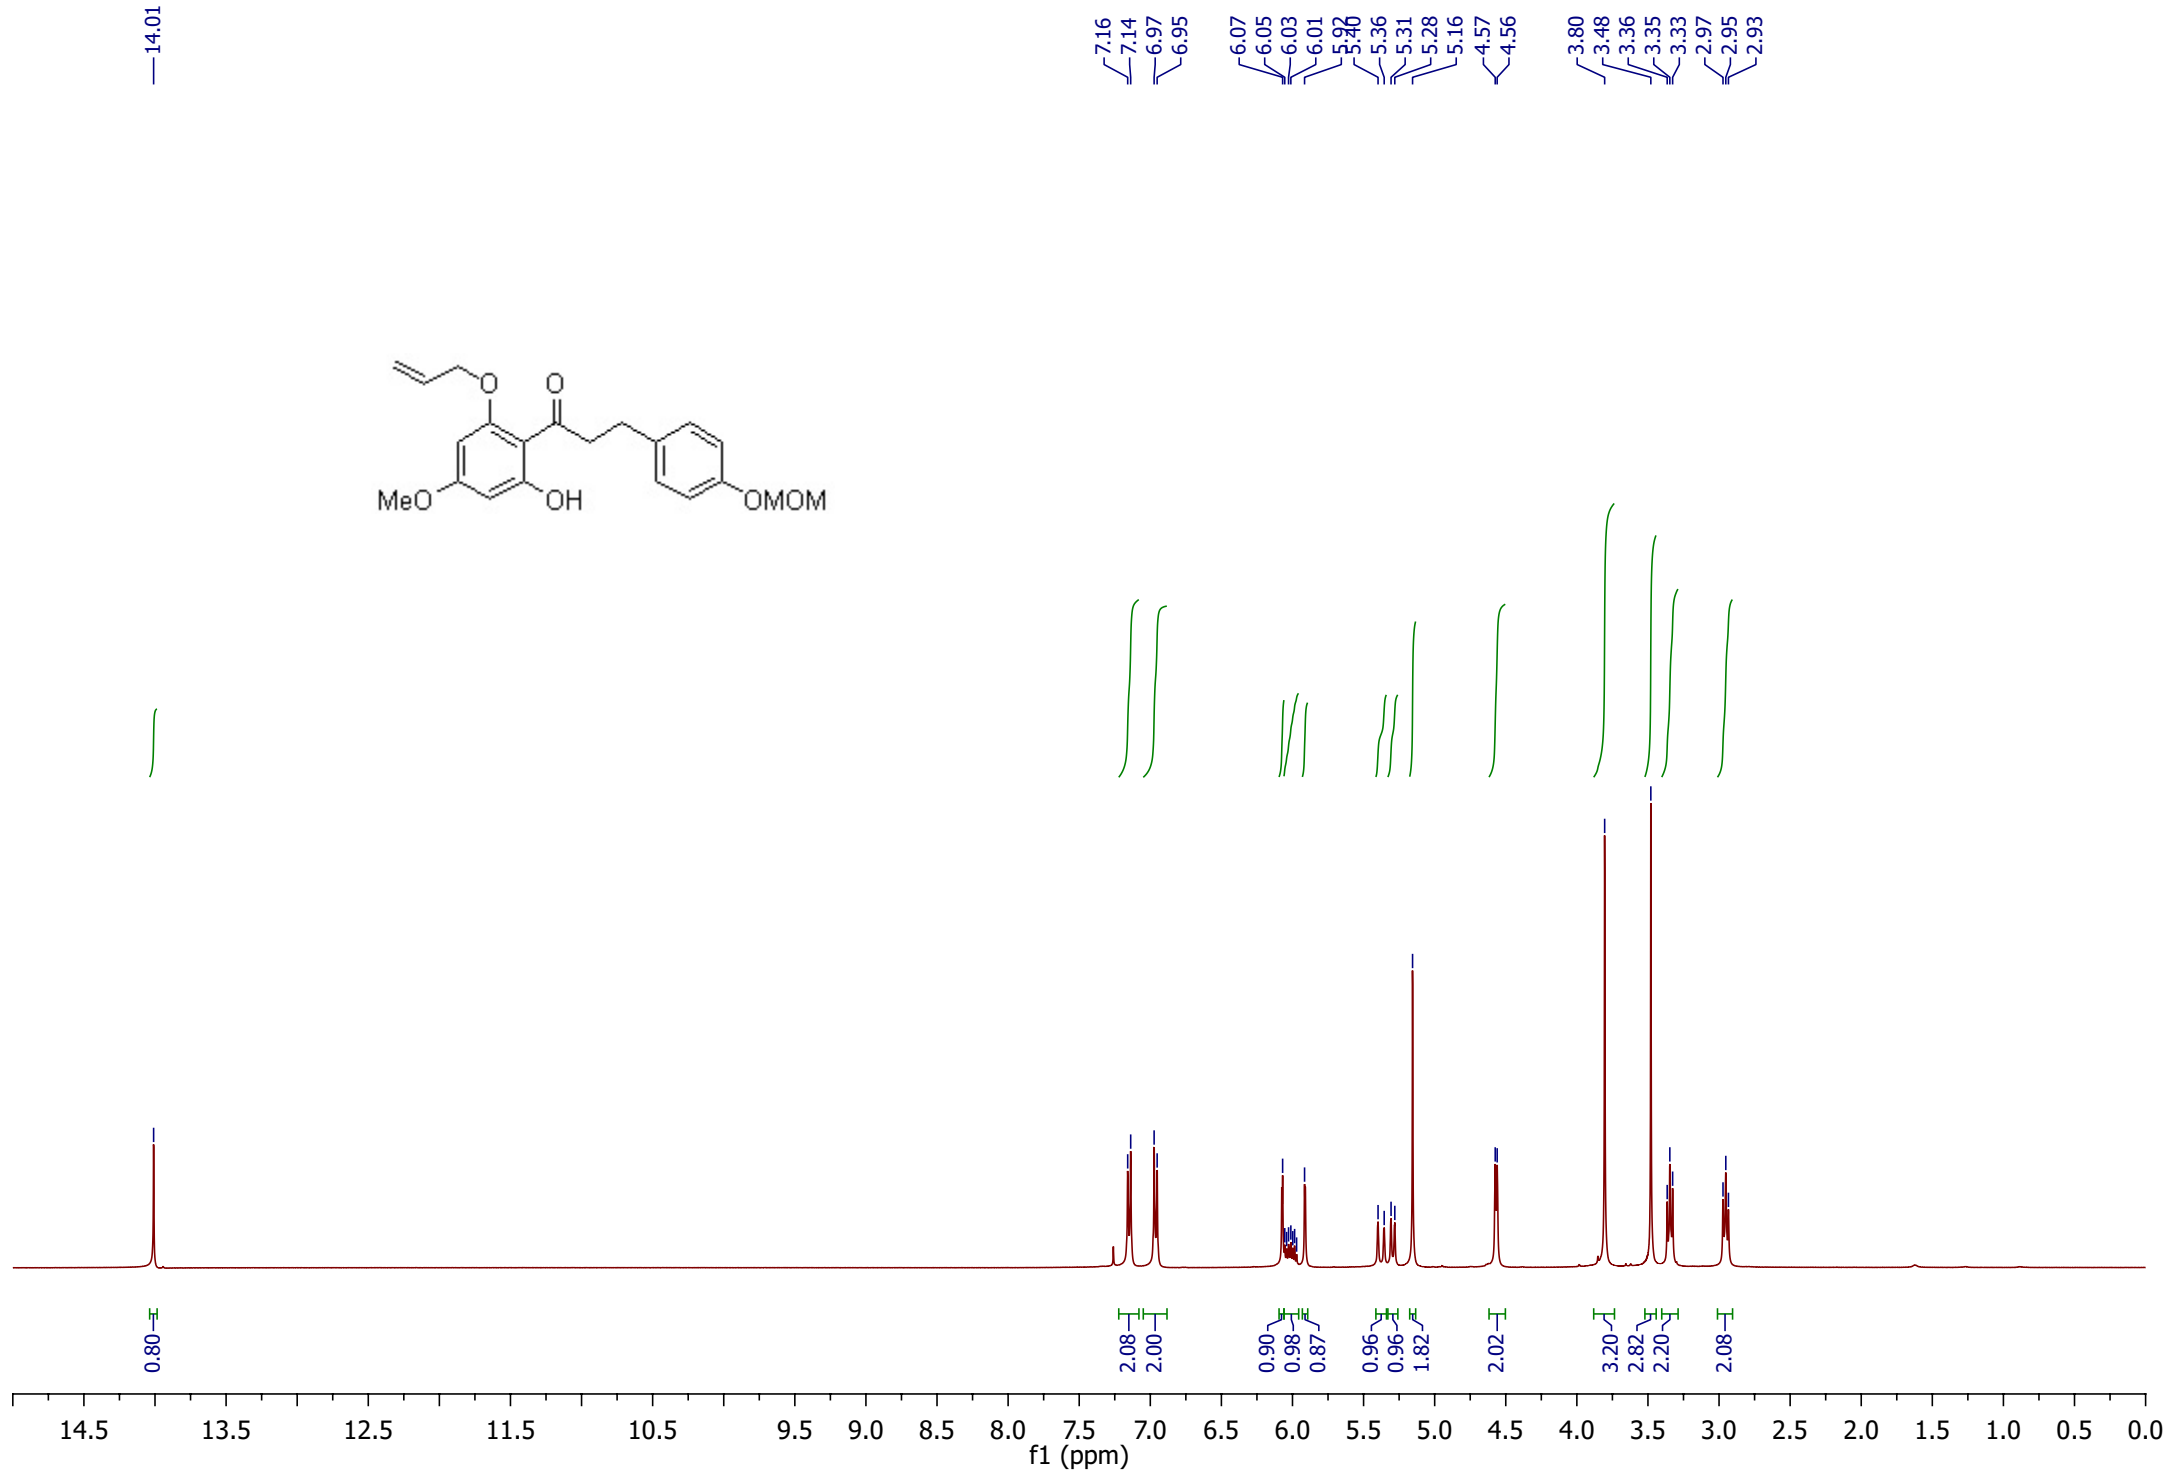

<sup>13</sup>C NMR spectrum of compound **9a**

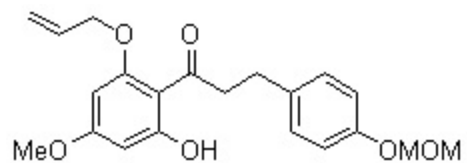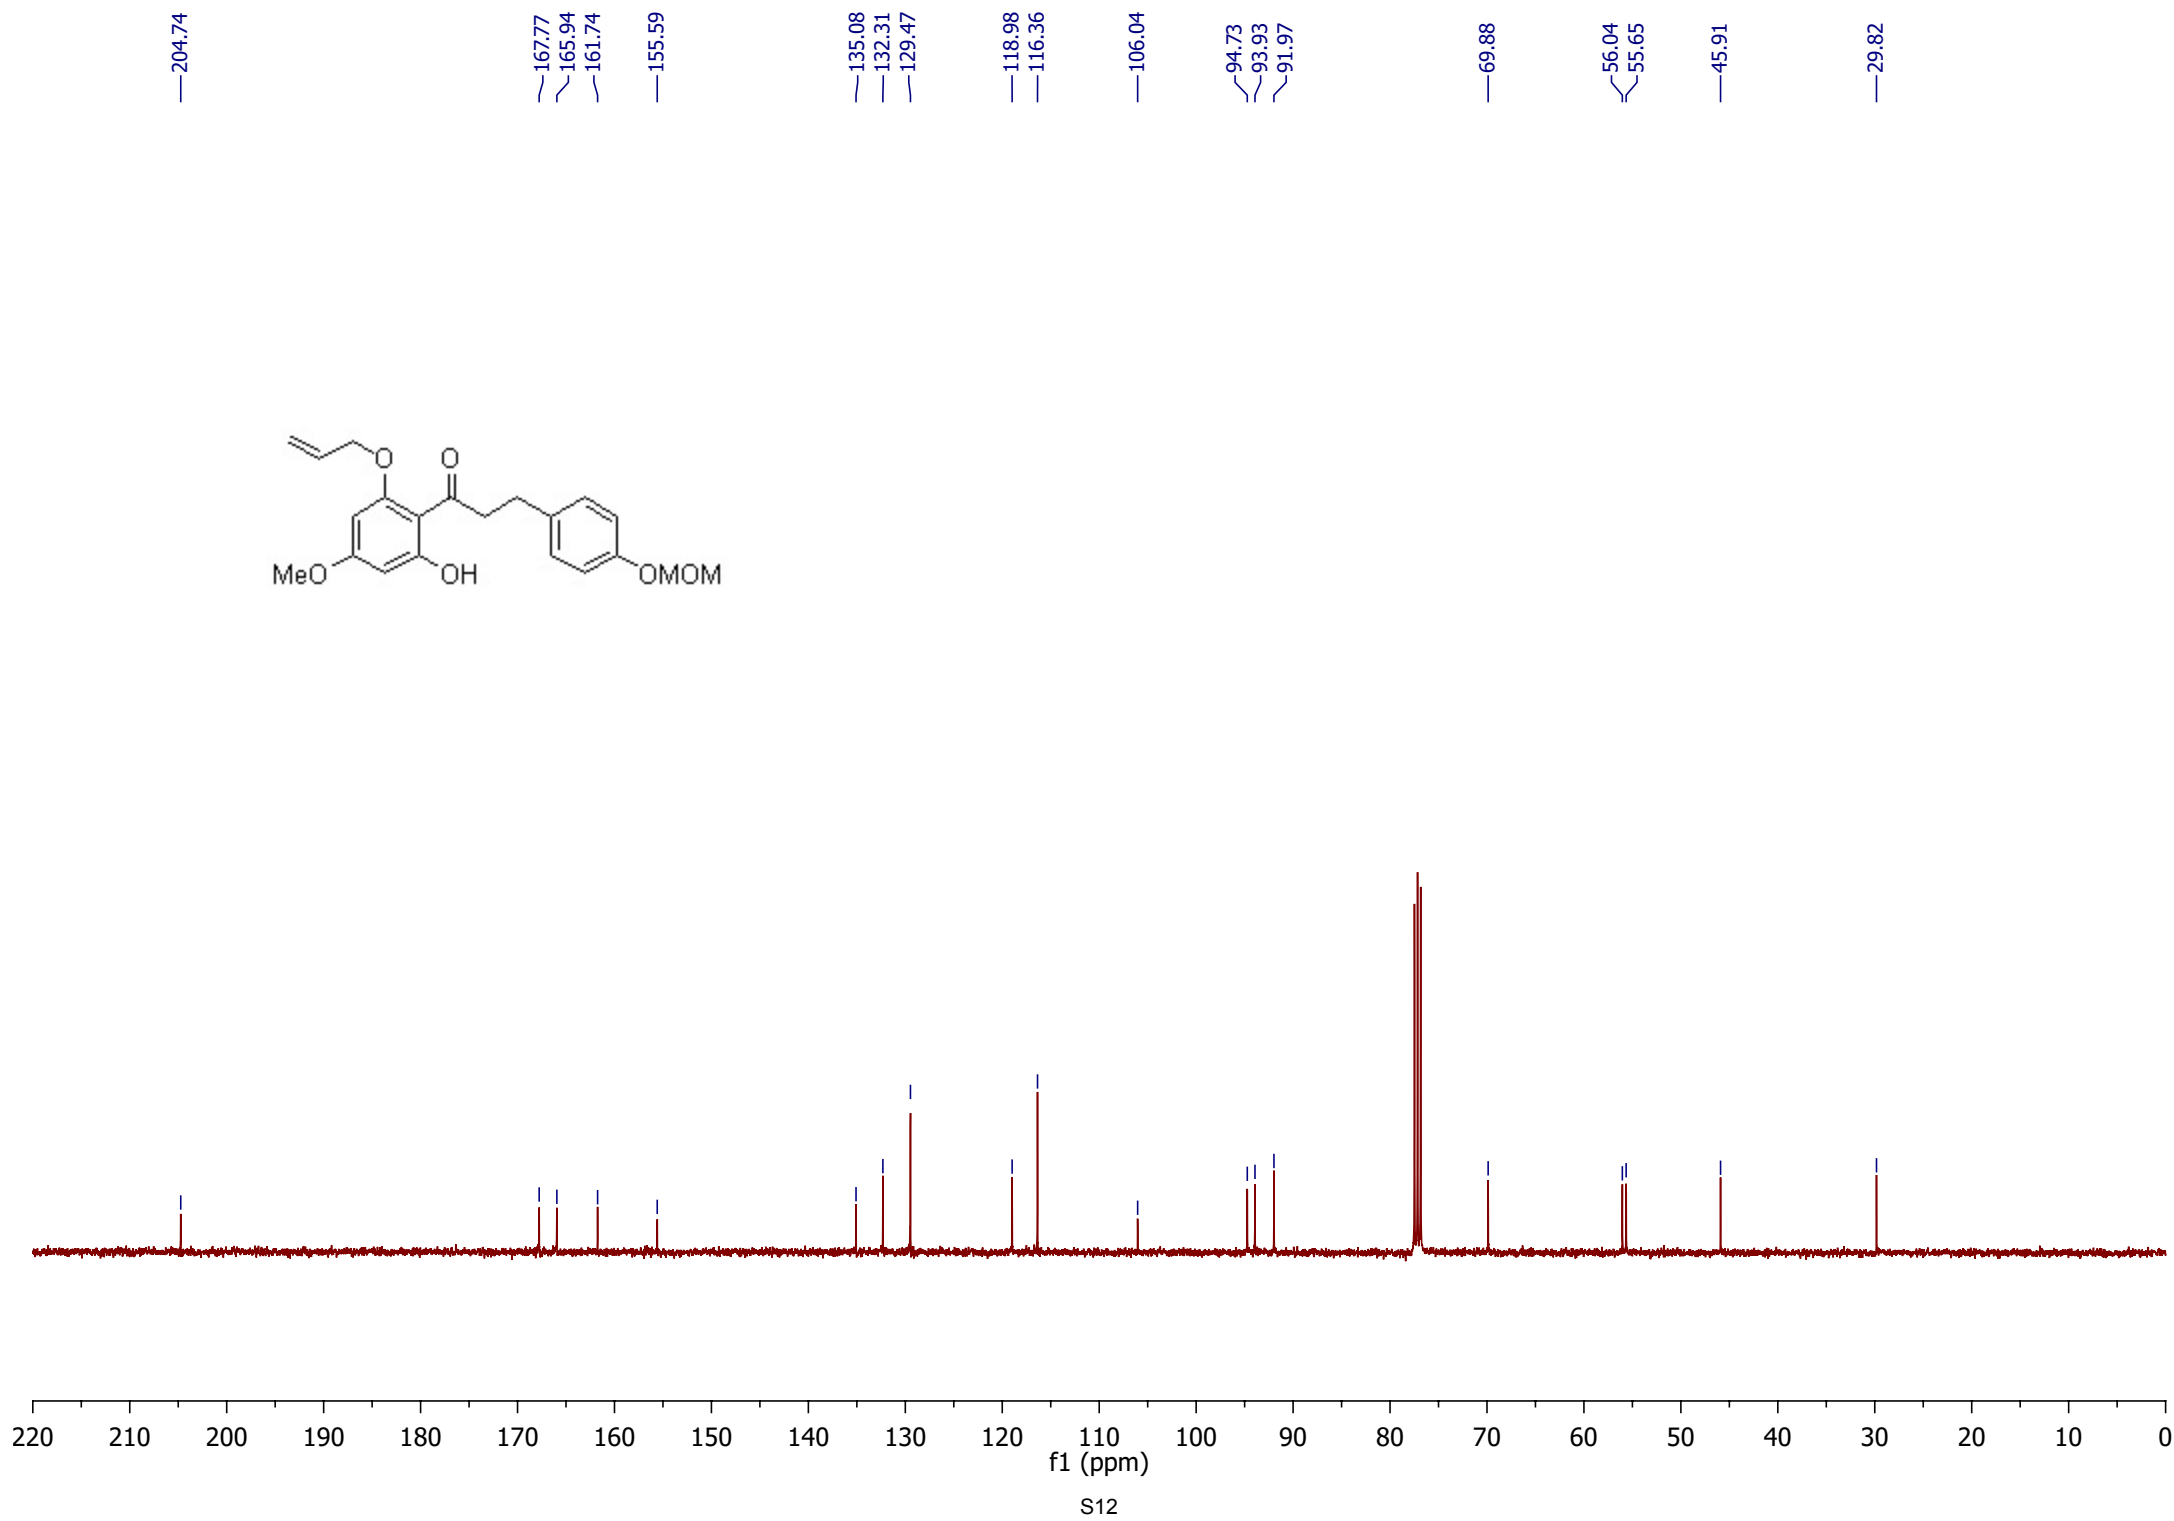

<sup>1</sup>H NMR spectrum of compound **9b**

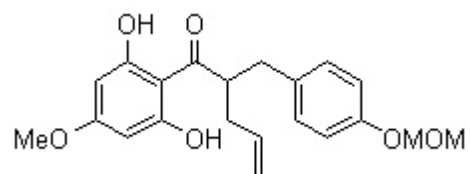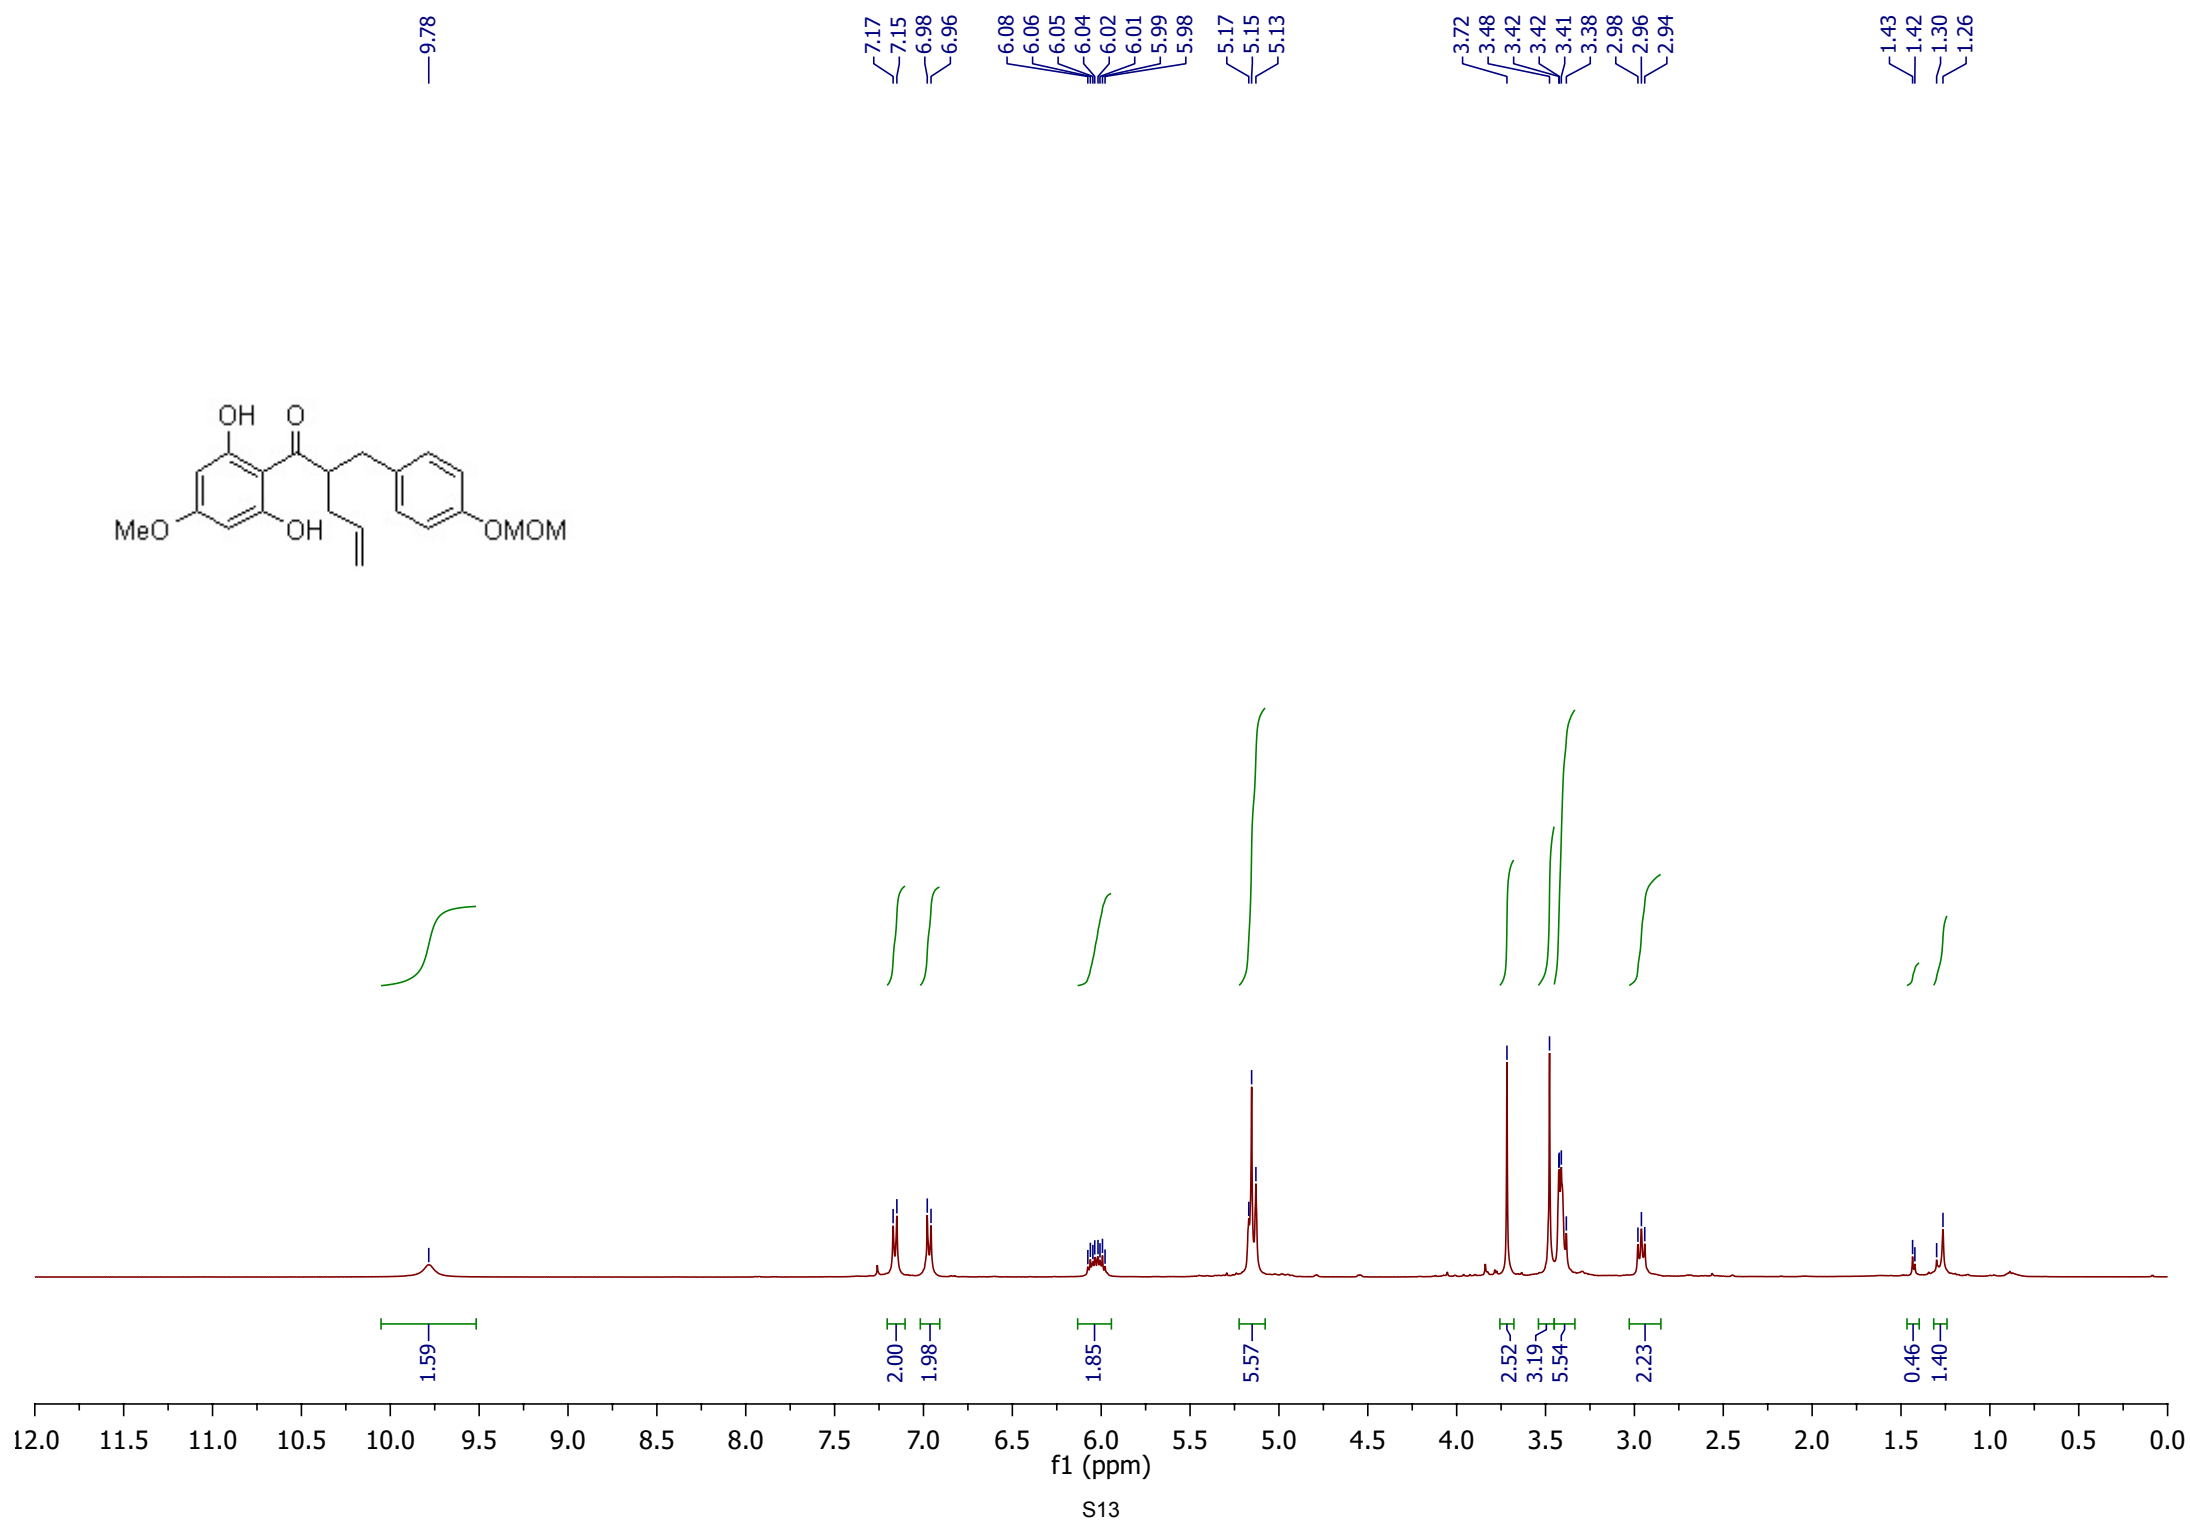

<sup>13</sup>C NMR spectrum of compound **9b**

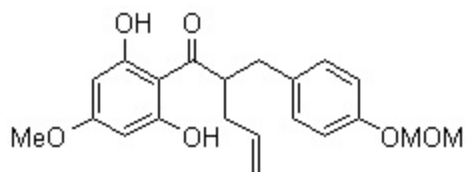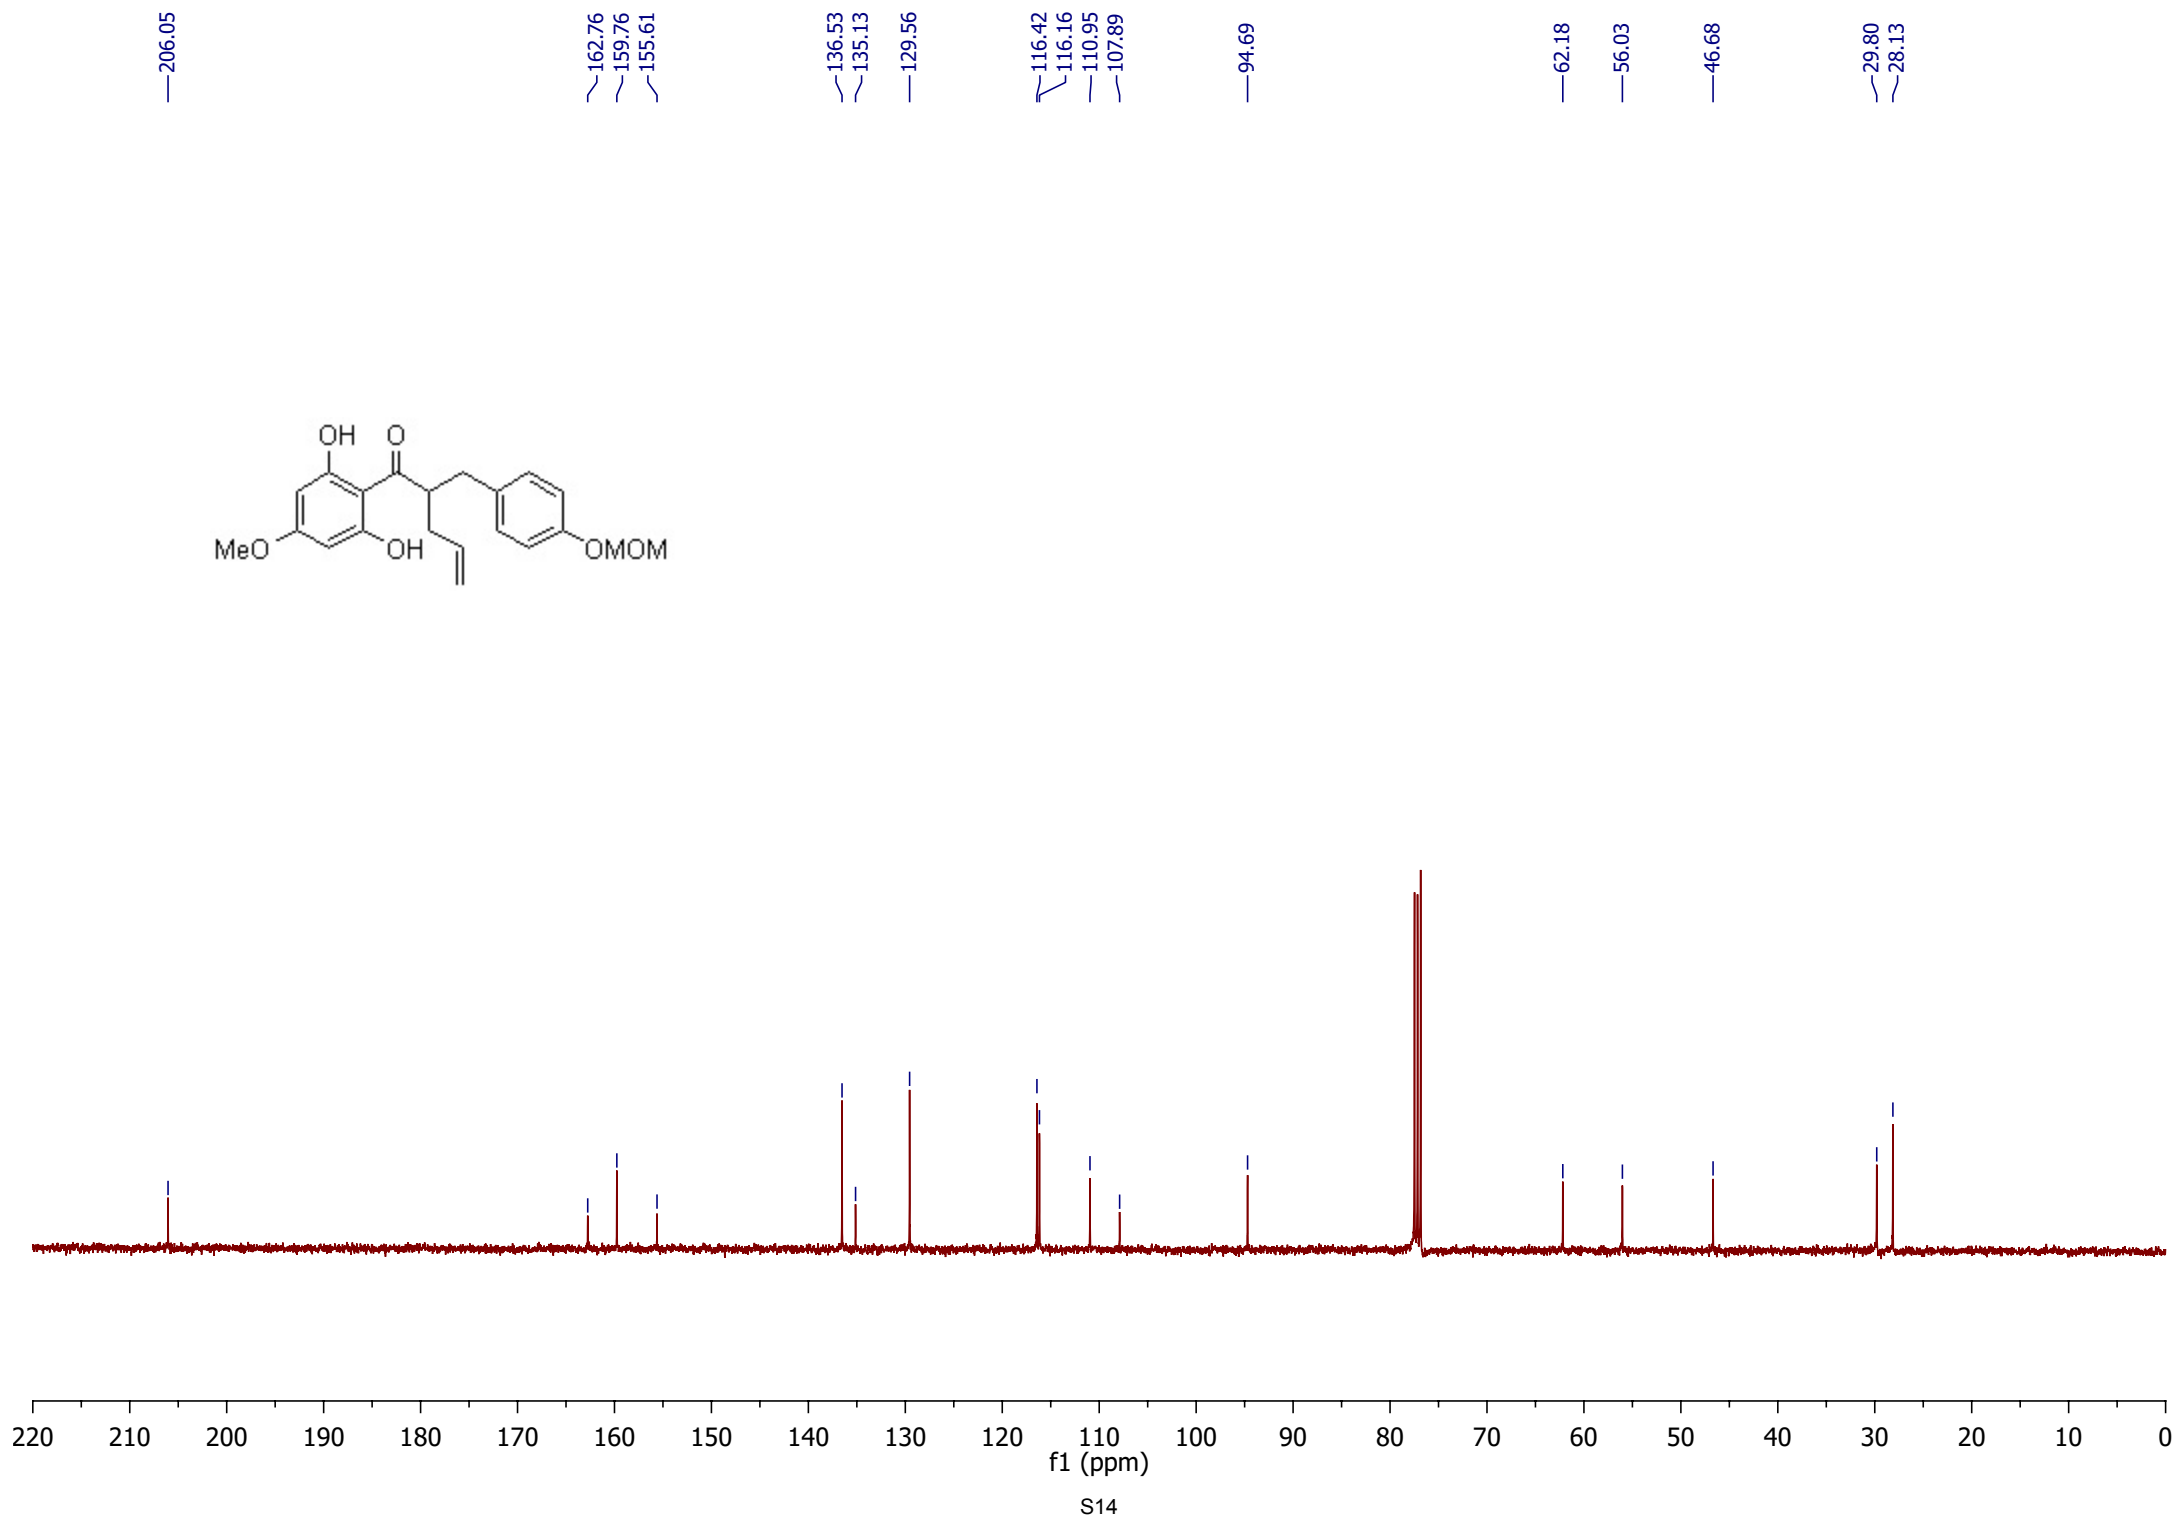

<sup>1</sup>H NMR spectrum of compound **10**

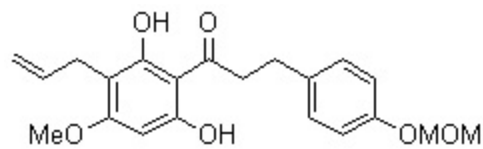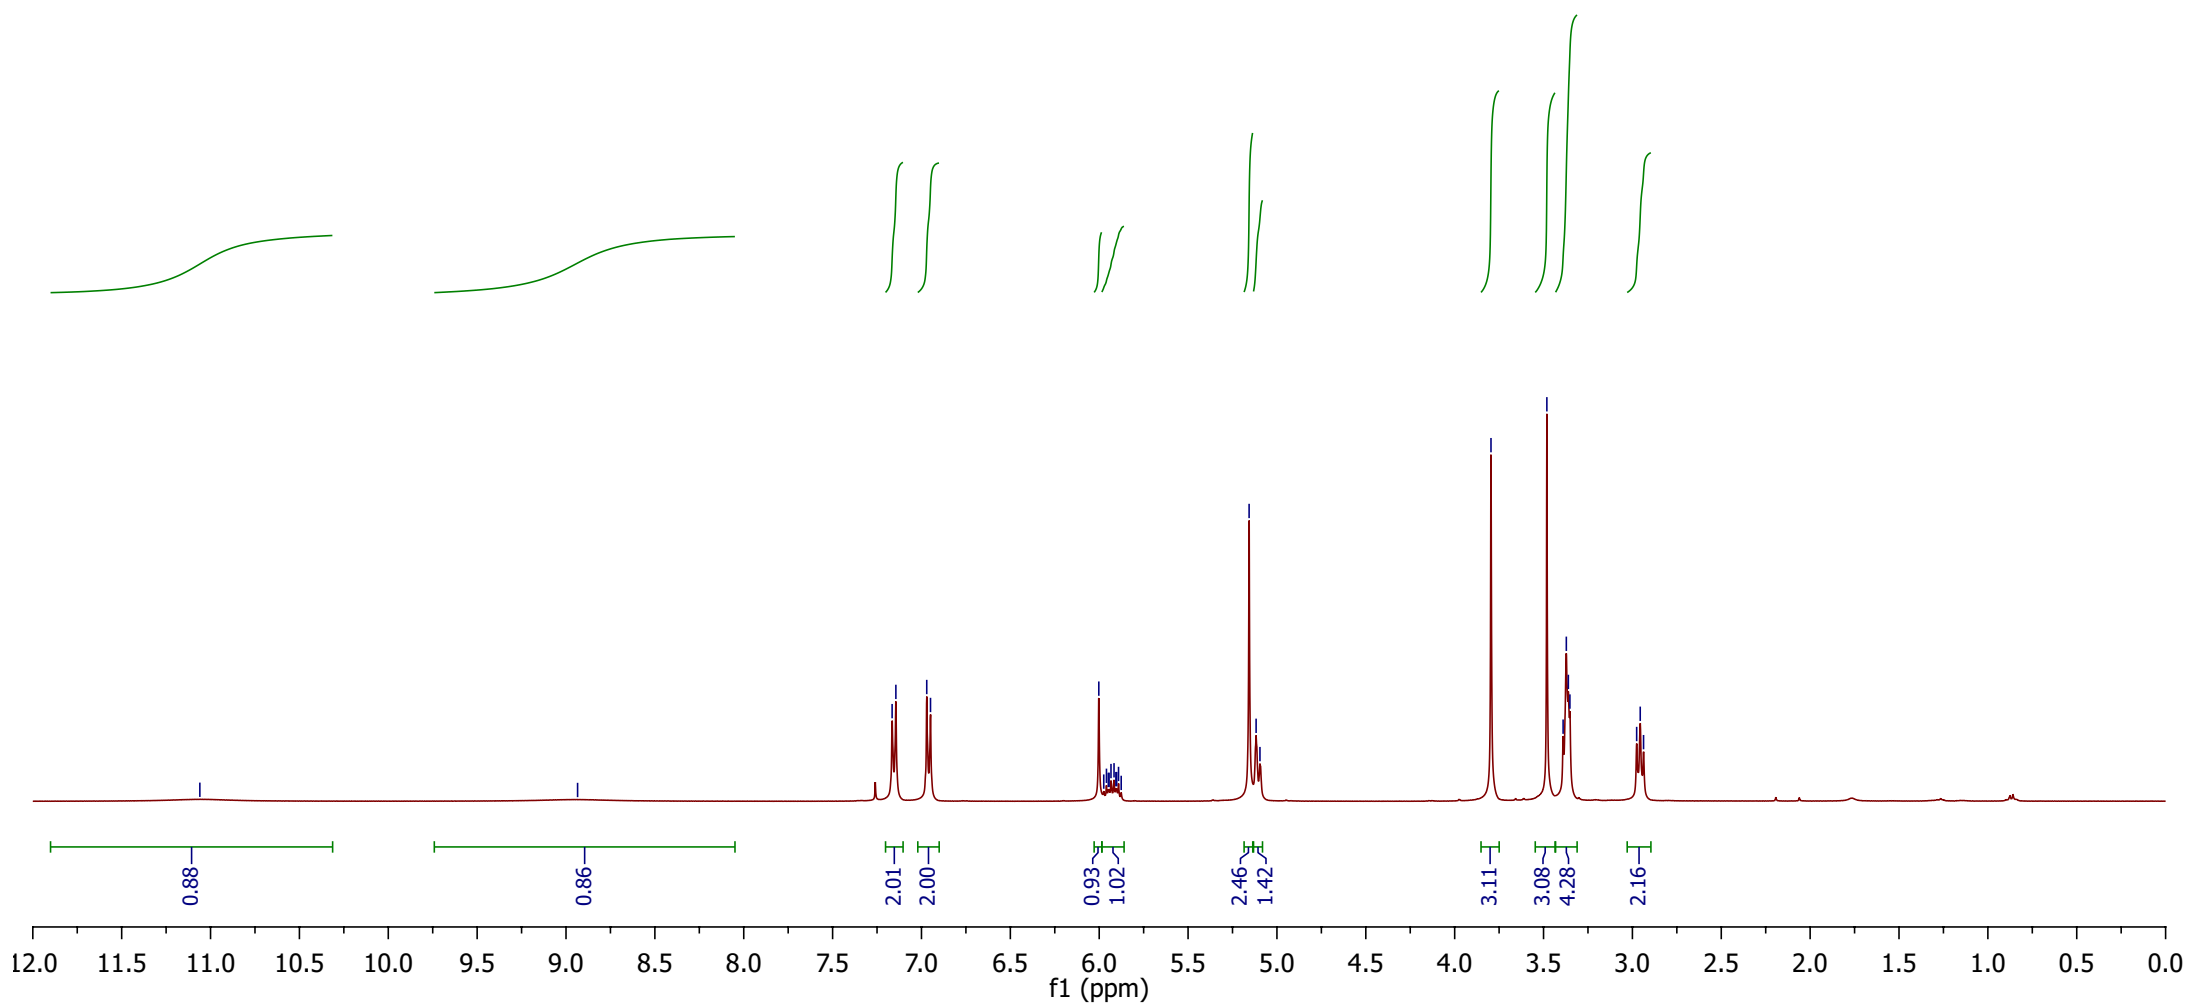

<sup>13</sup>C NMR spectrum of compound **10**

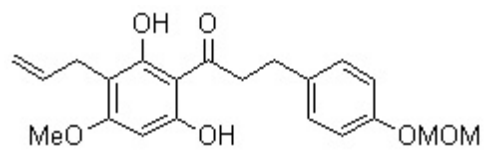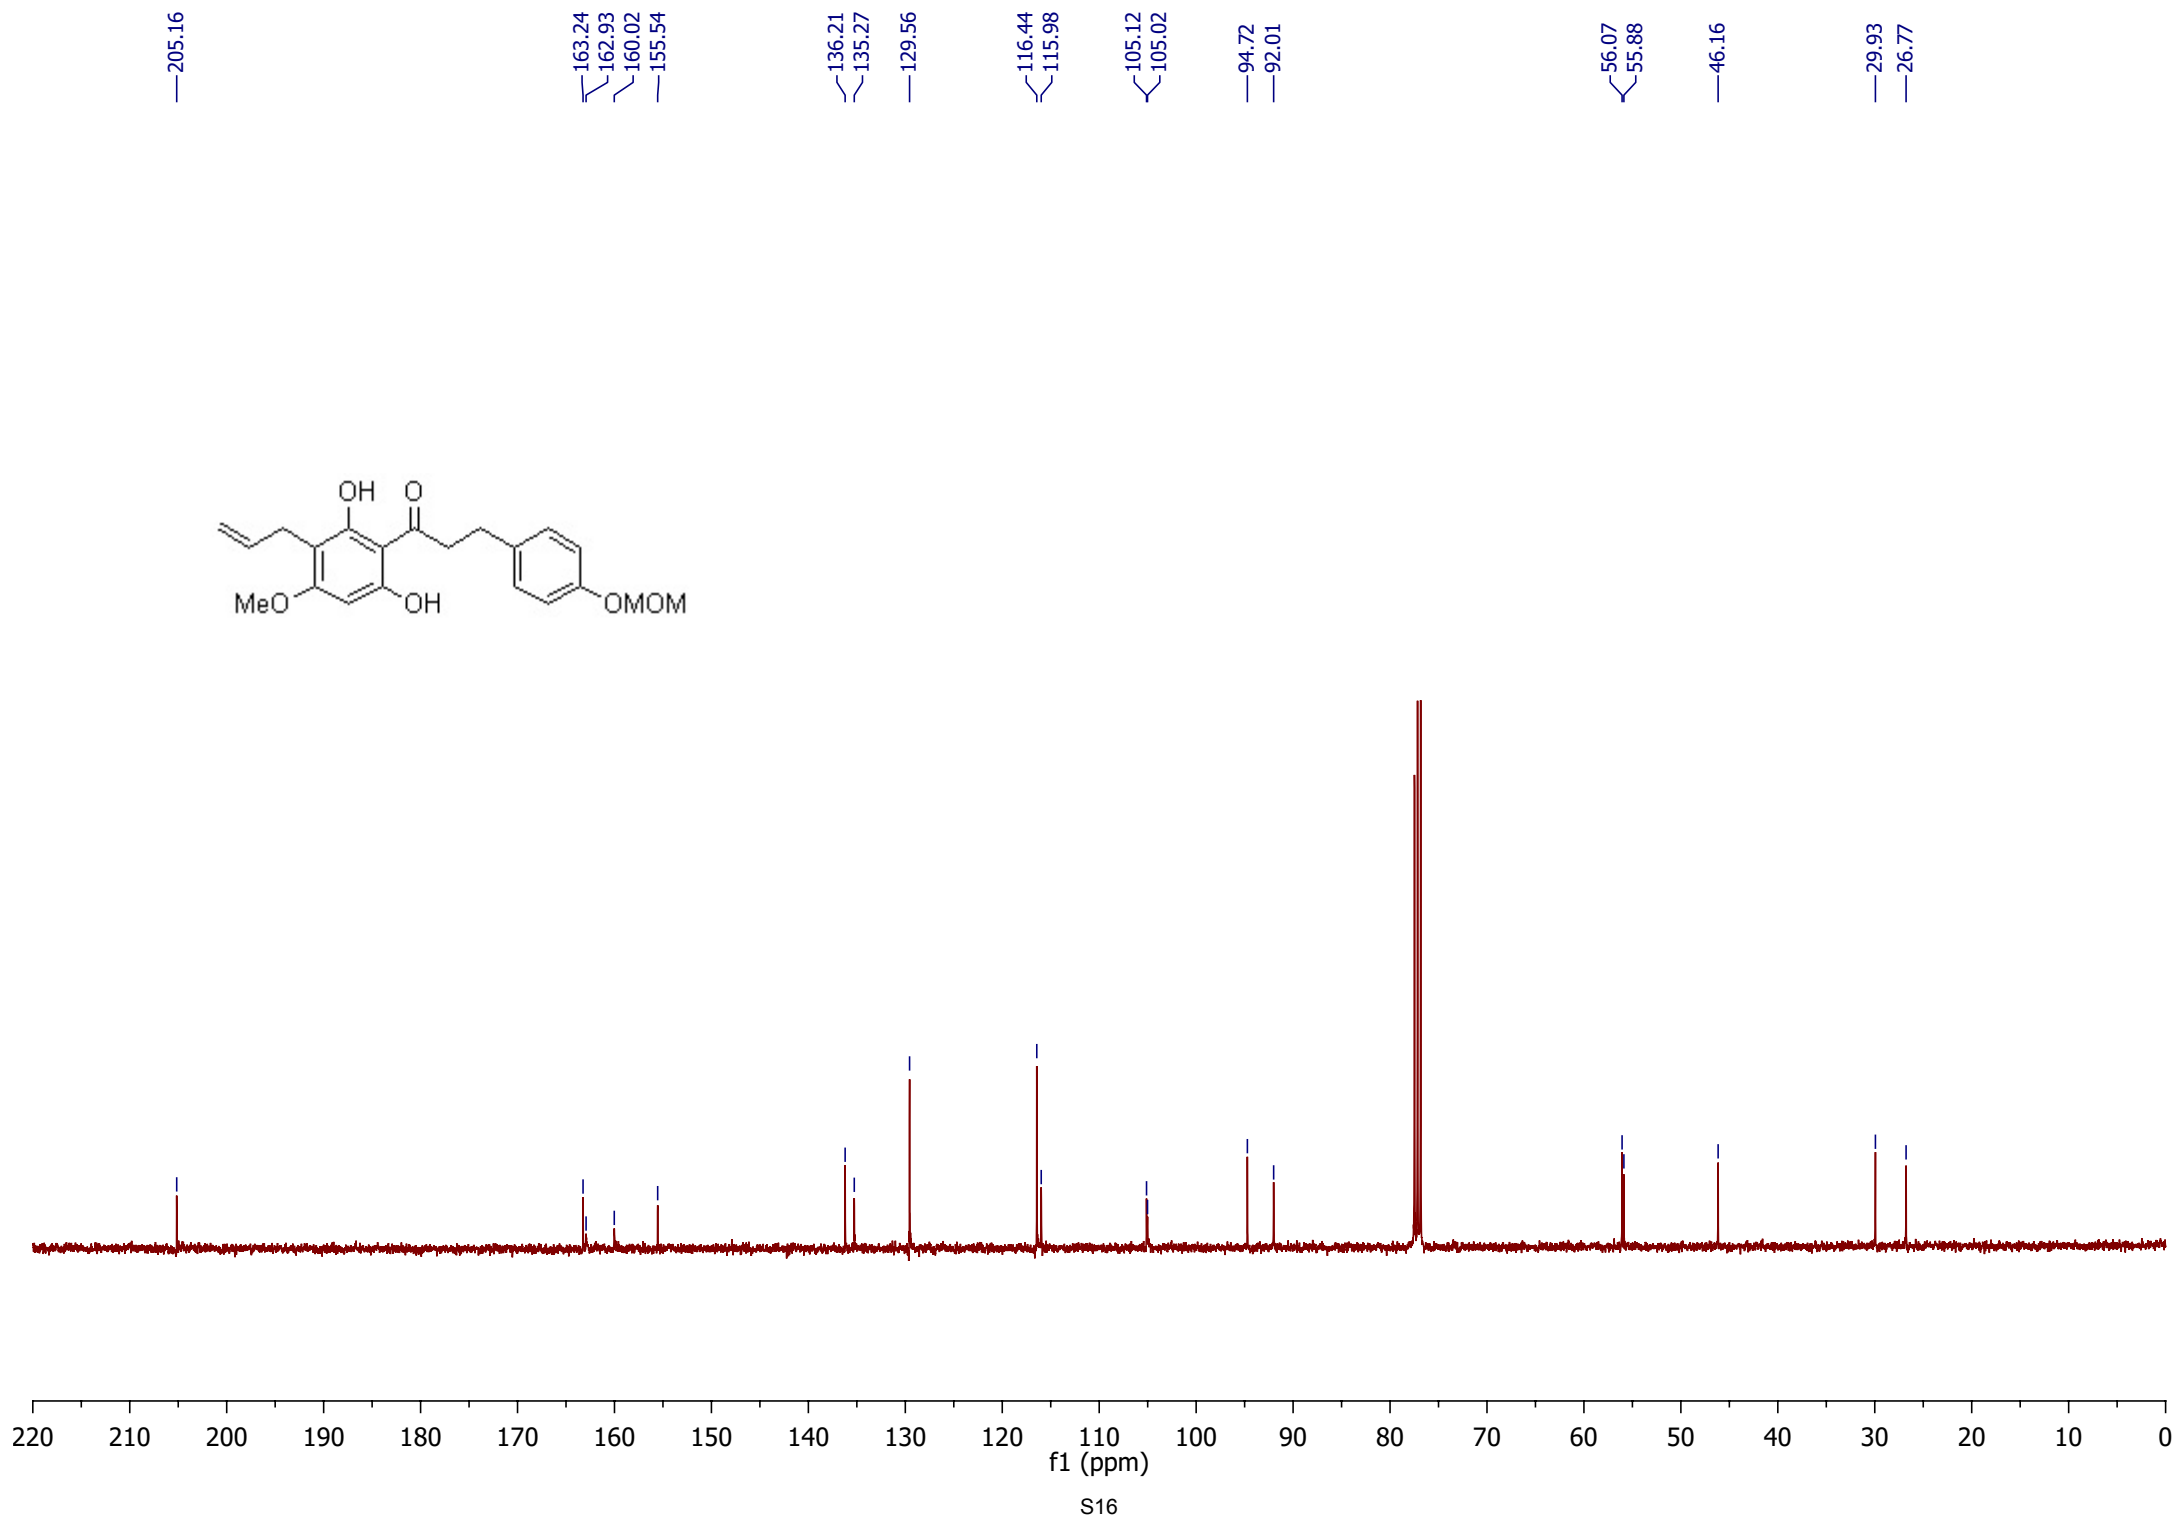



<sup>1</sup>H NMR spectrum of compound **12**

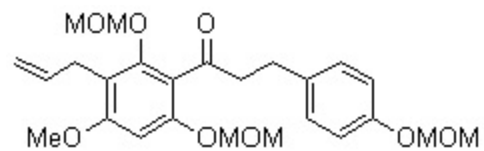

7.16  
7.13  
6.96  
6.93  
— 6.53  
5.97  
5.95  
5.94  
5.94  
5.93  
5.92  
5.91  
5.90  
5.14  
5.08  
4.98  
4.97  
4.97  
4.96  
4.94  
4.94  
4.93  
4.93  
4.84  
— 3.81  
3.46  
3.46  
3.43  
3.36  
3.35  
3.12  
3.10  
3.08  
2.98  
2.96  
2.94

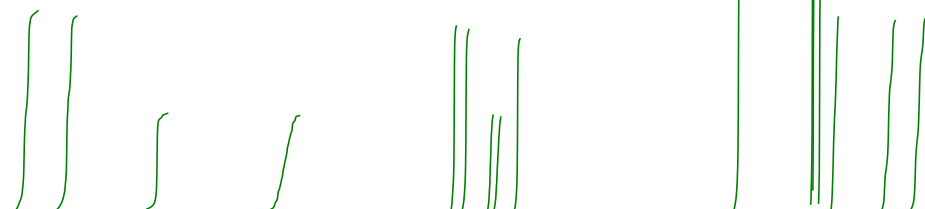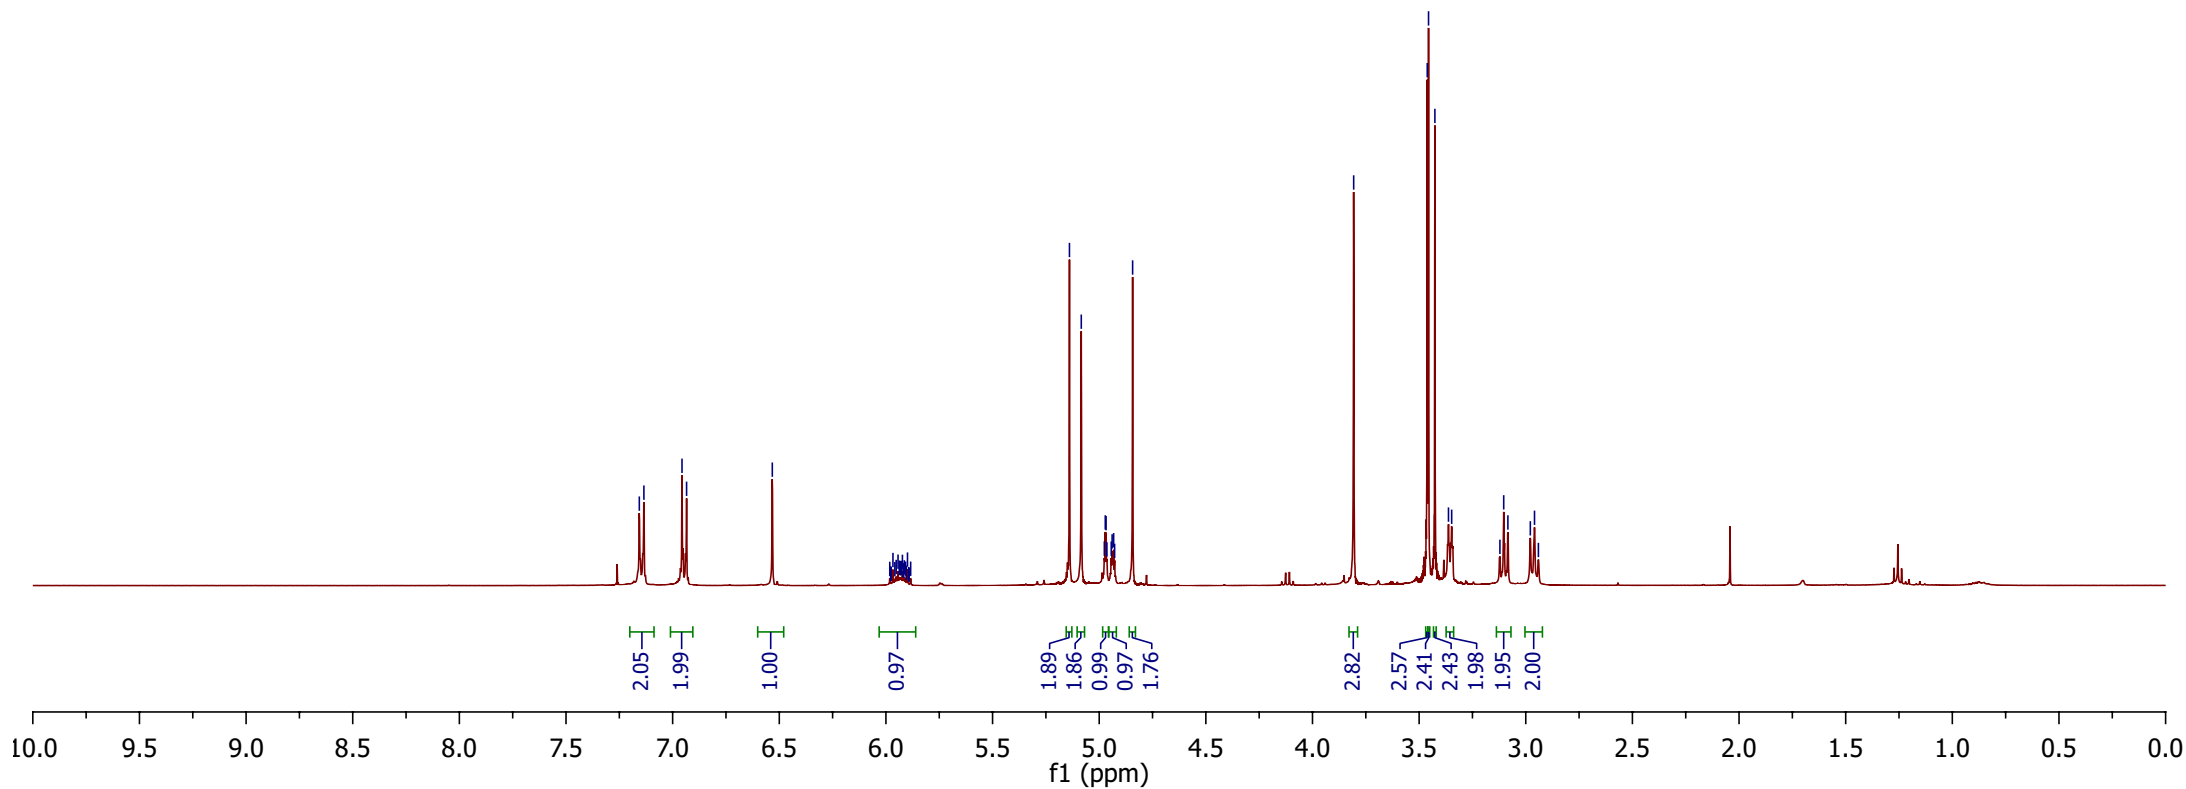

<sup>13</sup>C NMR spectrum of compound **12**

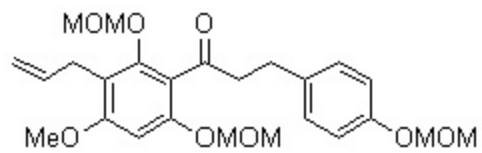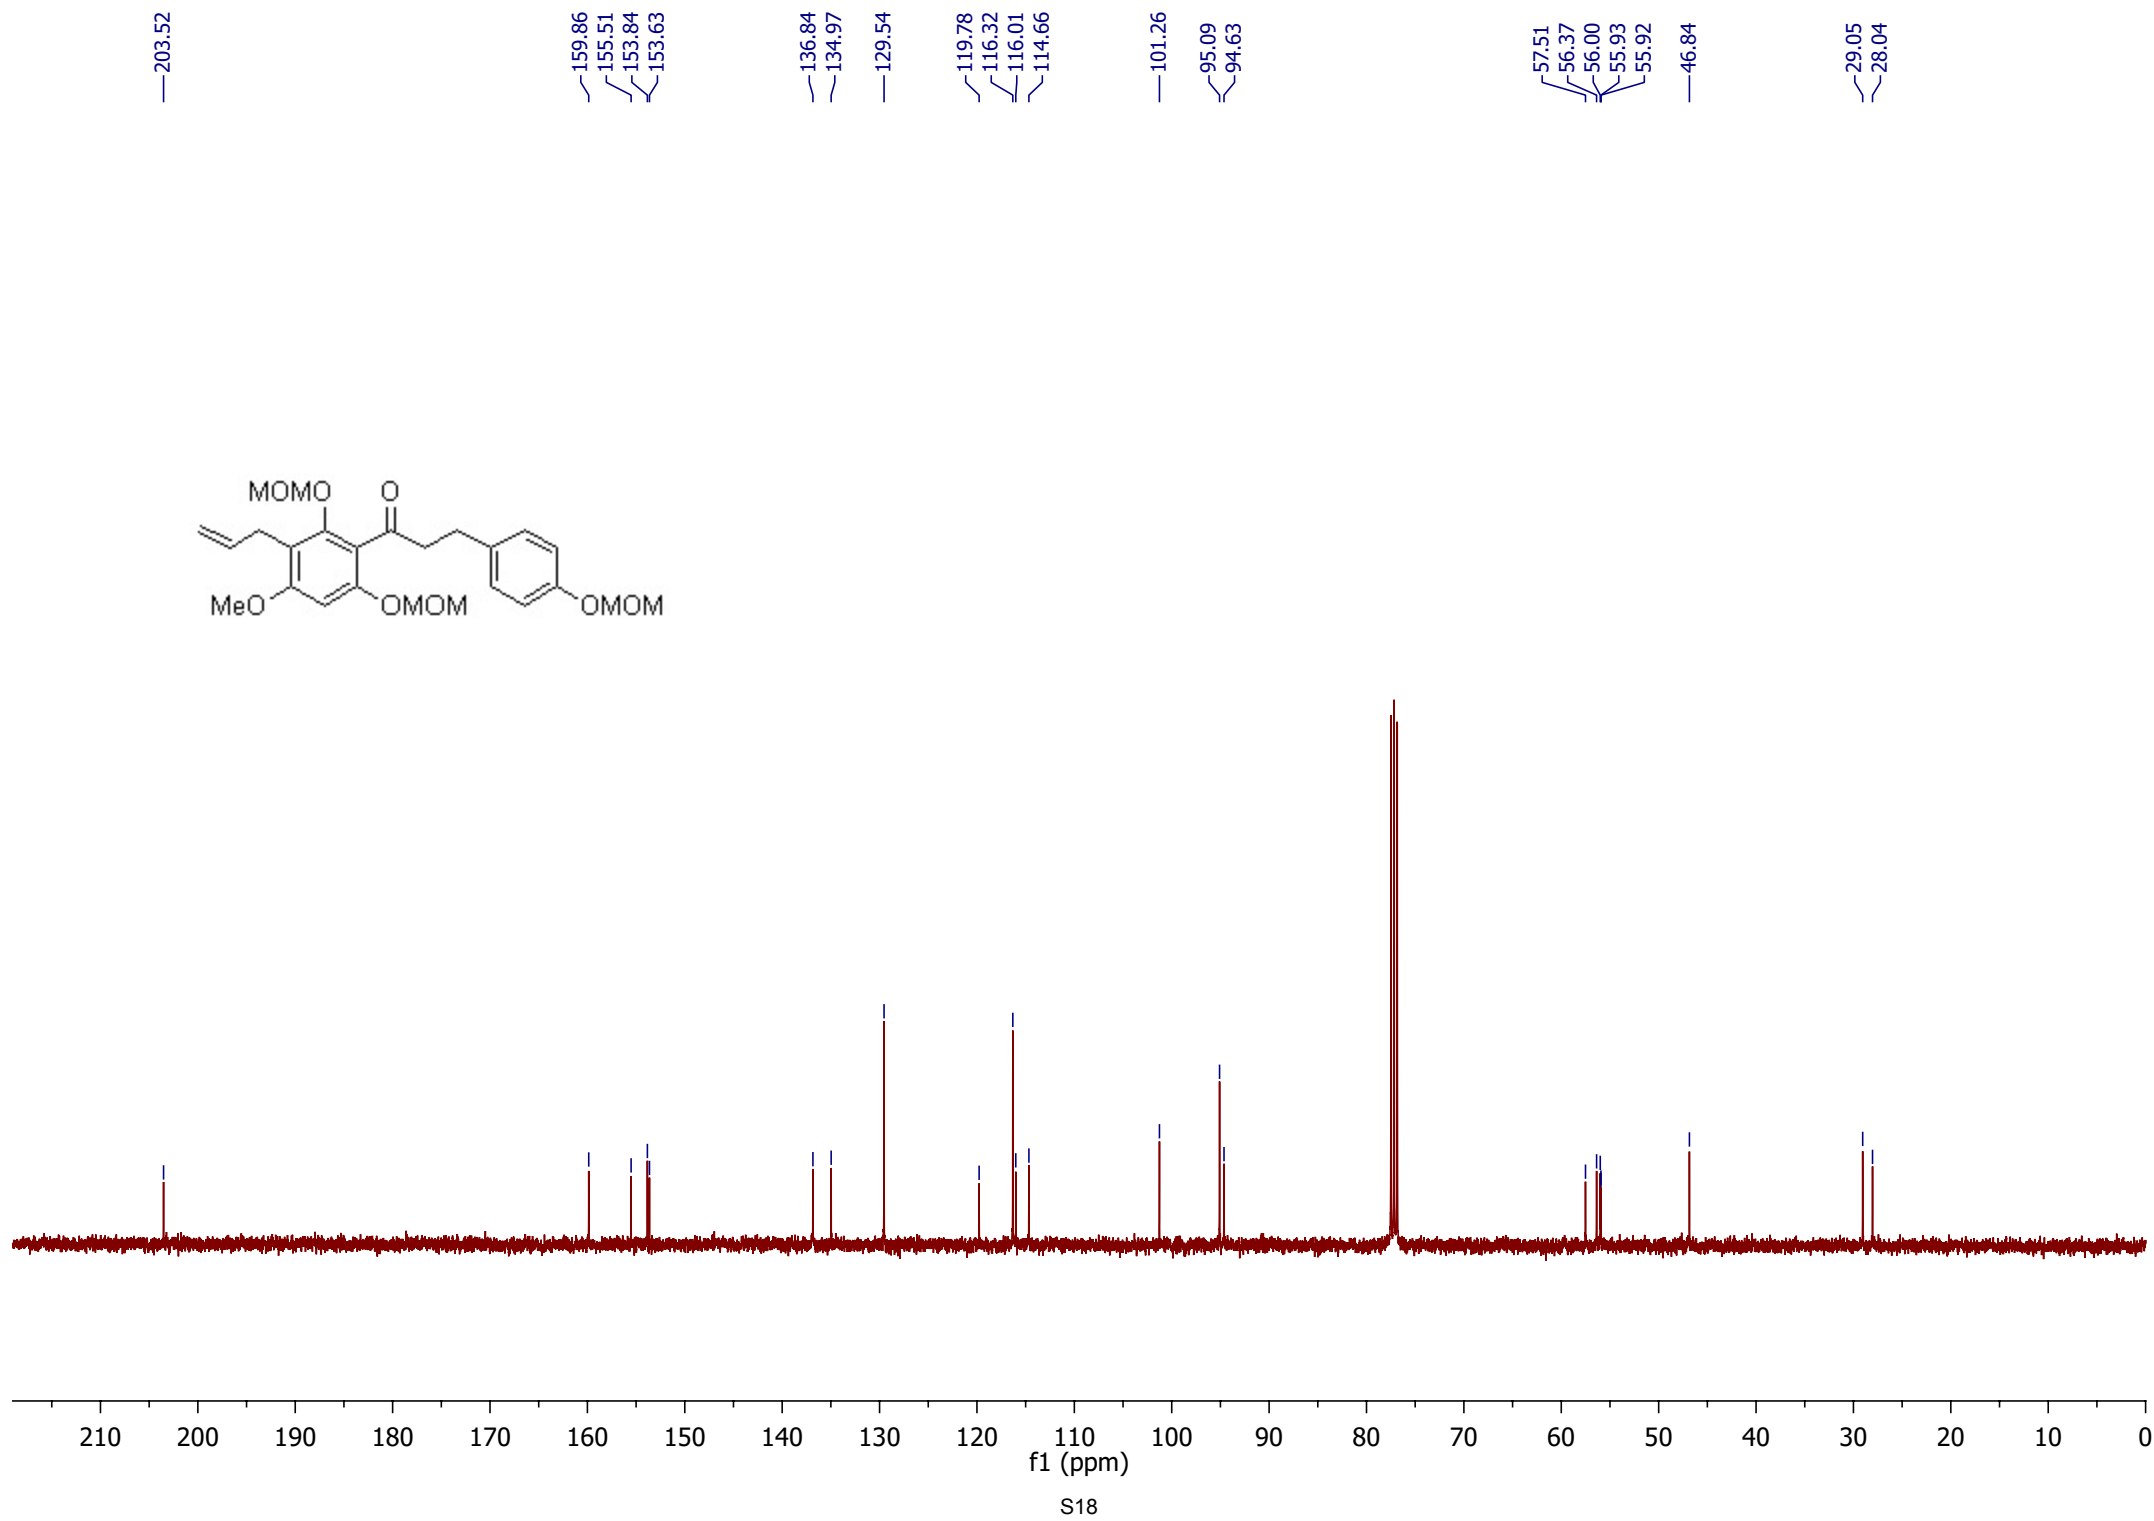

<sup>1</sup>H NMR spectrum of compound **14**

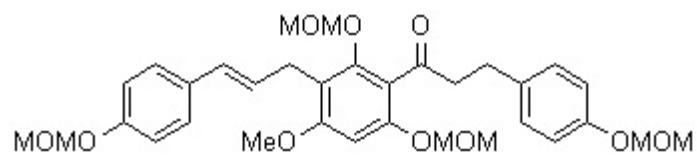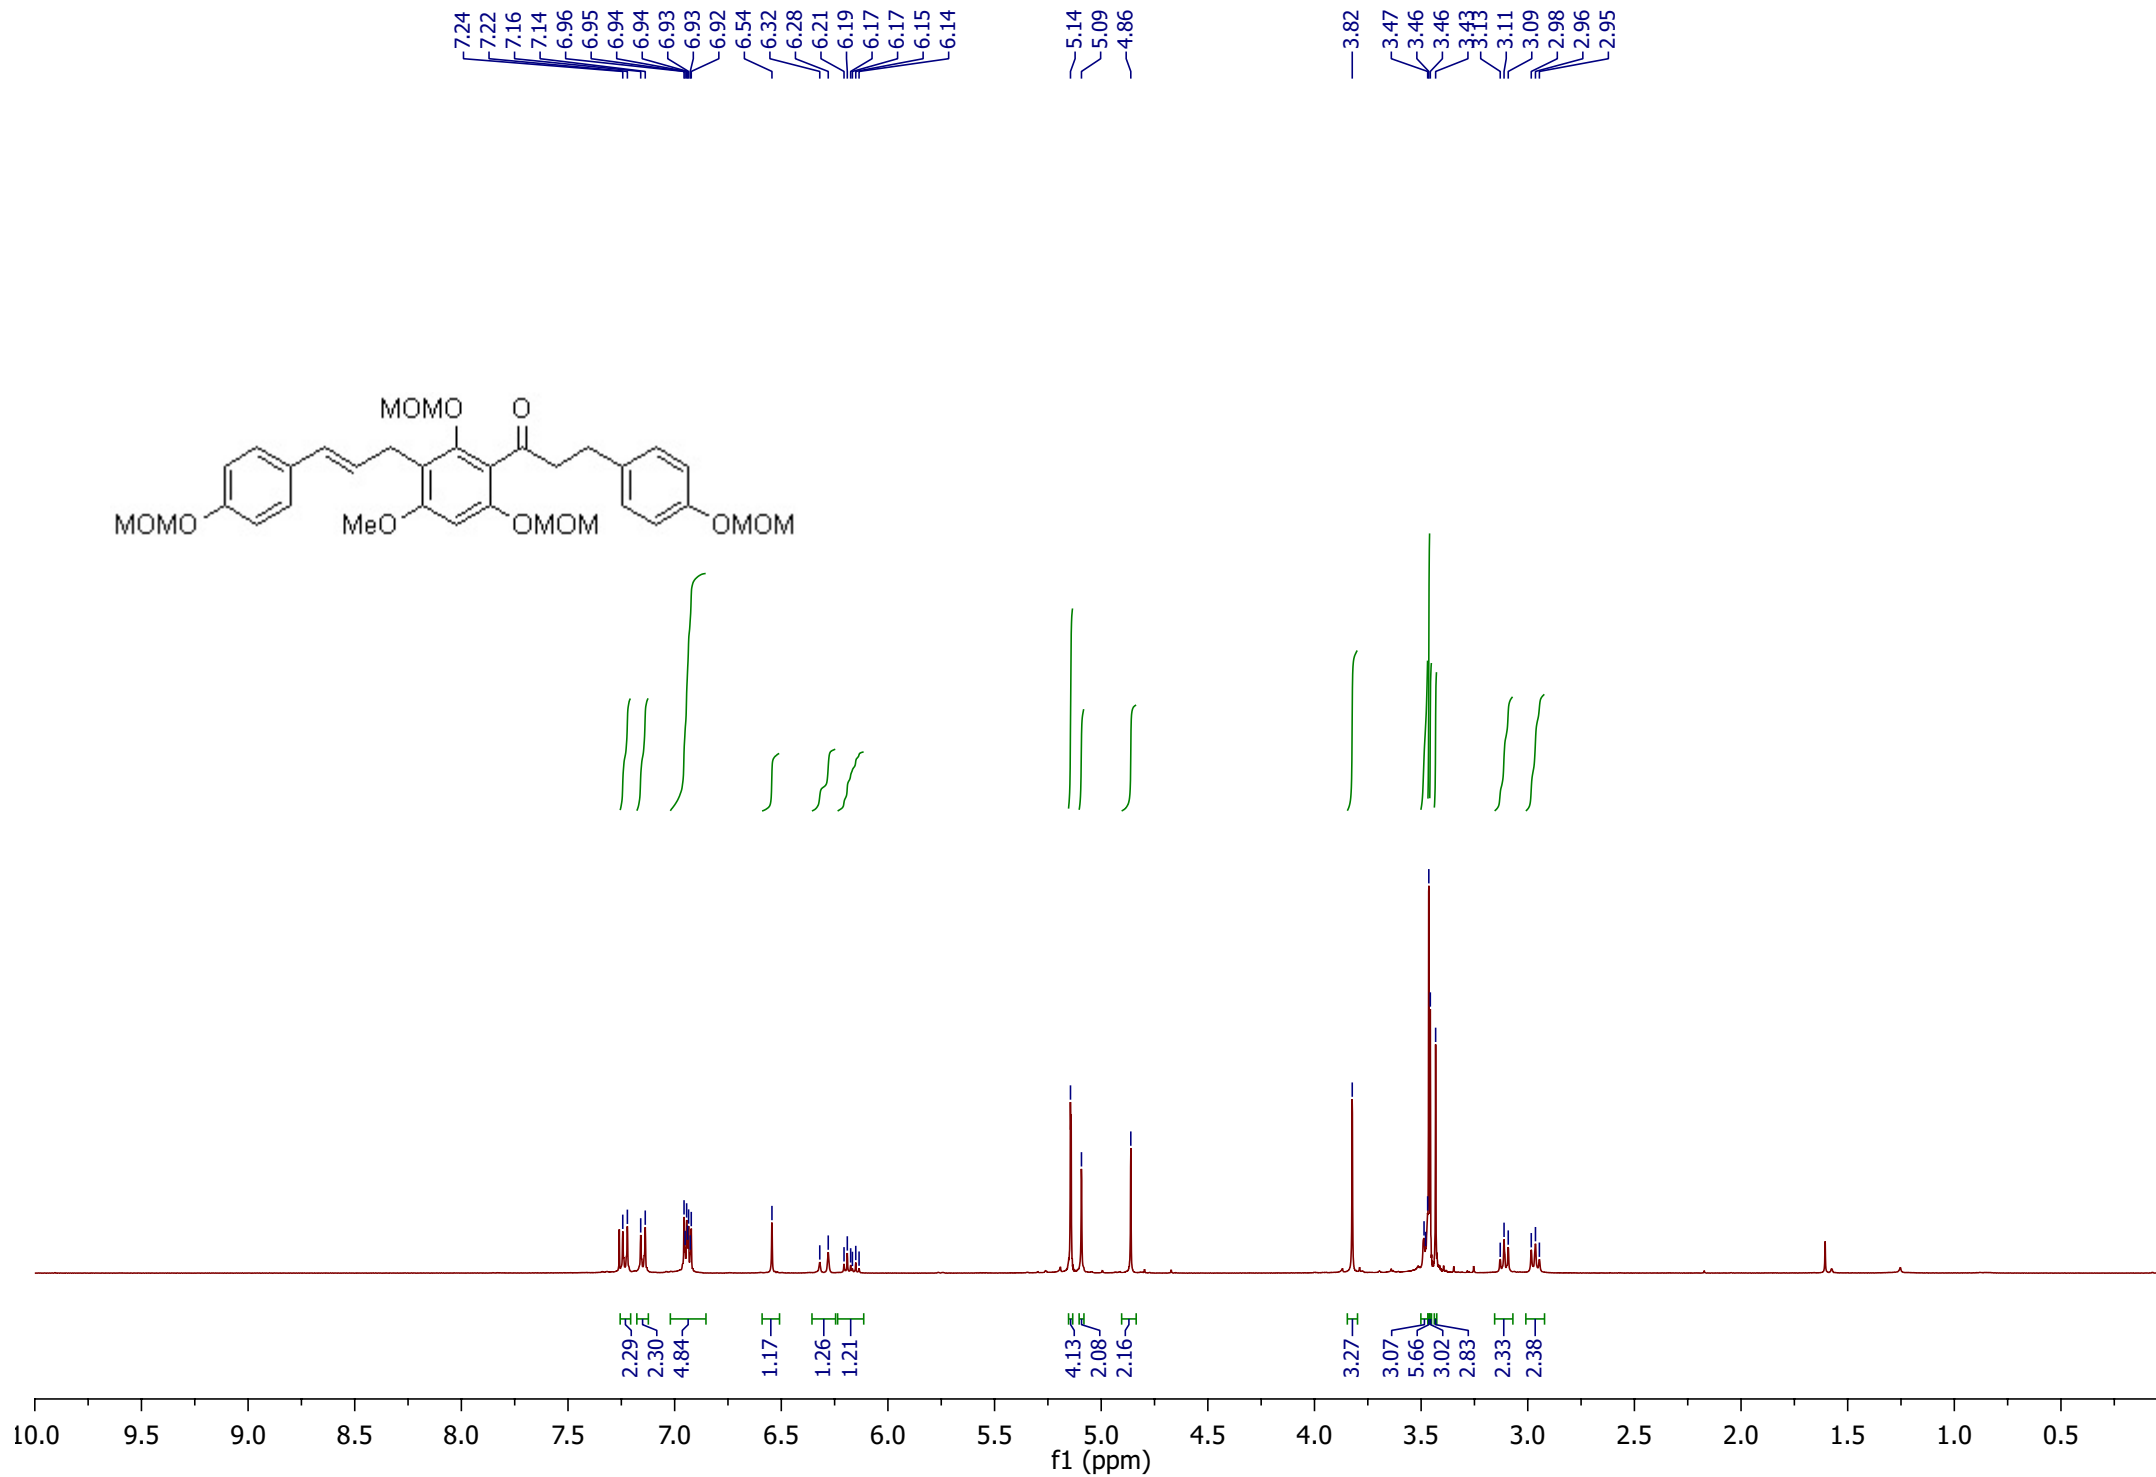

<sup>13</sup>C NMR spectrum of compound **14**

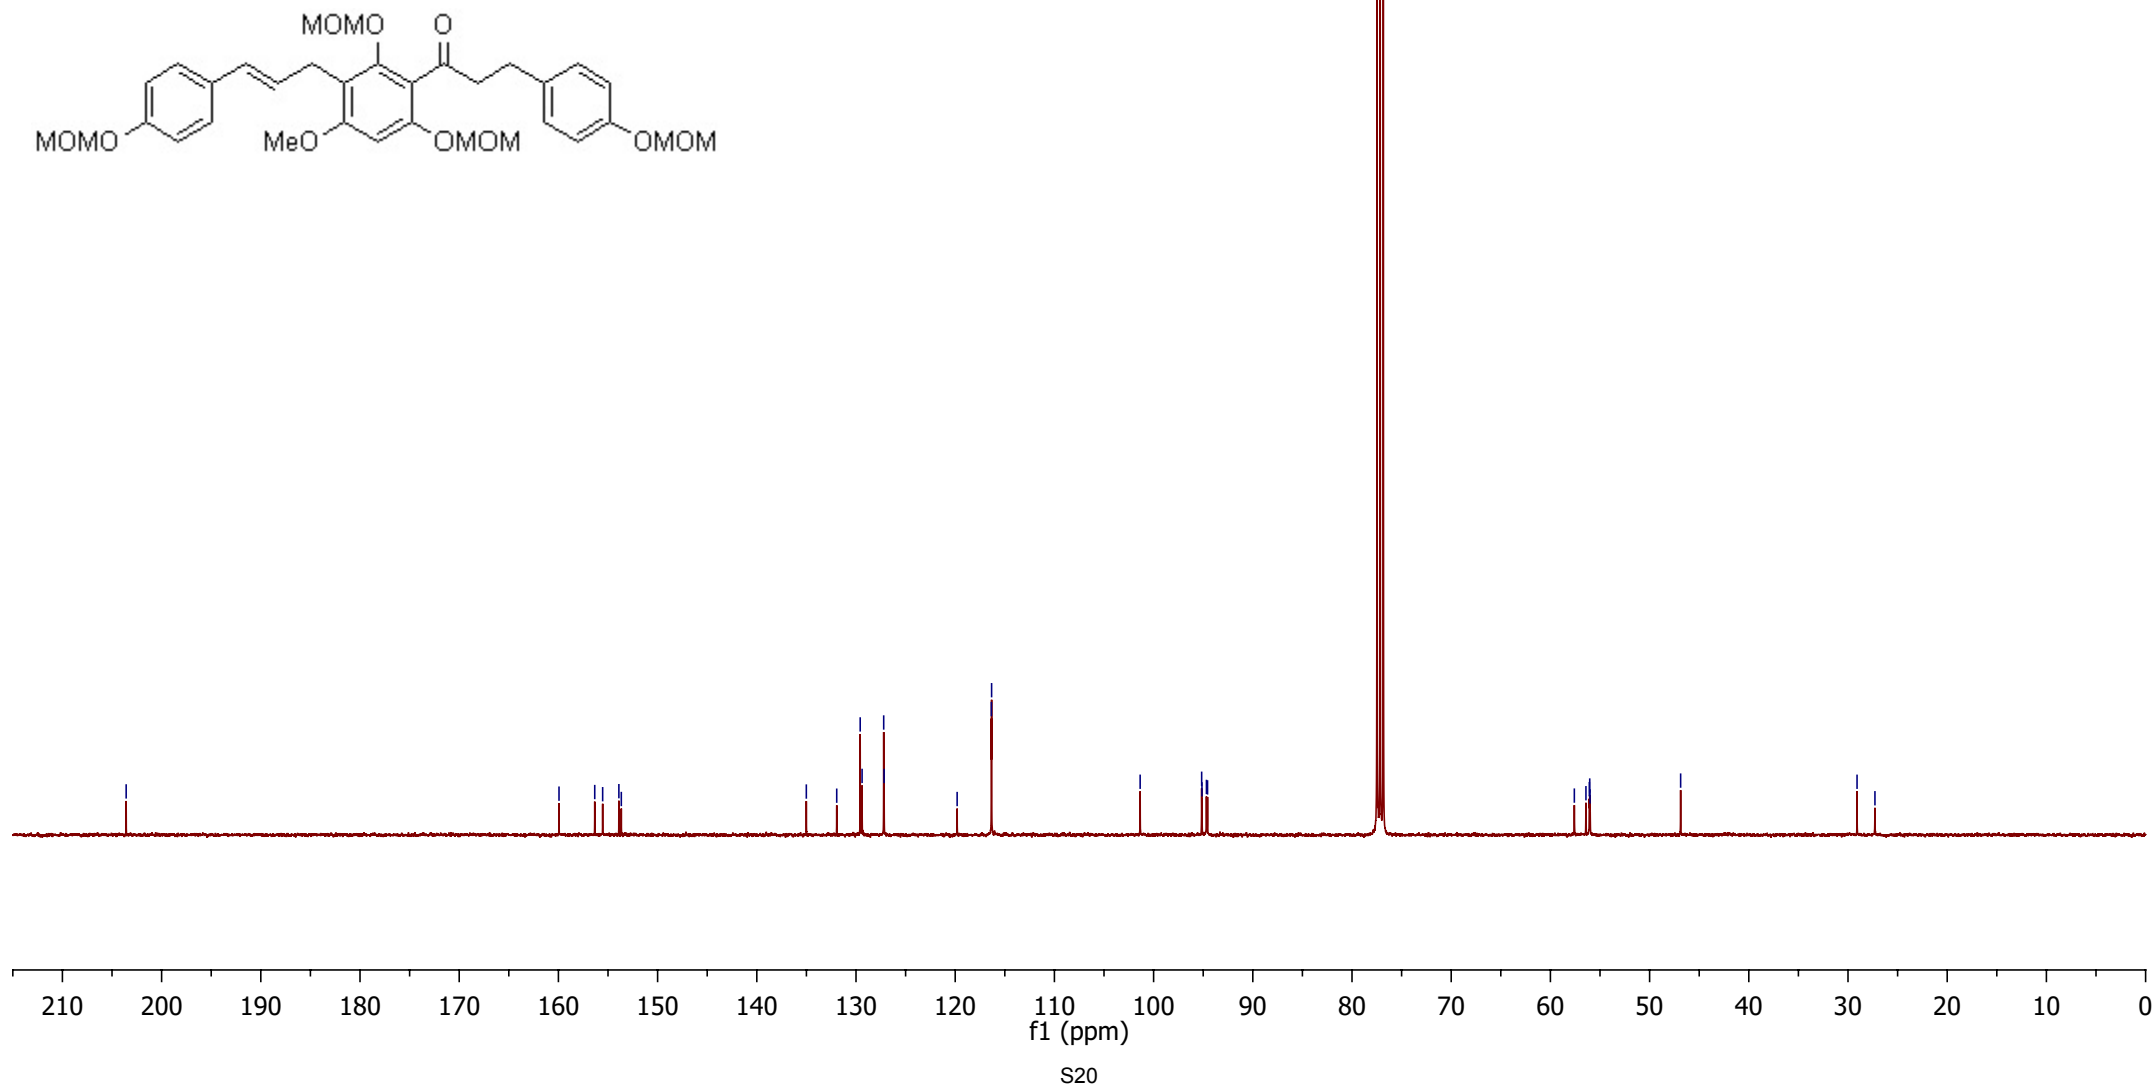

# Qualitative Analysis Report

|                               |              |                      |                      |
|-------------------------------|--------------|----------------------|----------------------|
| <b>Data Filename</b>          | Sample16.d   | <b>Sample Name</b>   | Sample16             |
| <b>Sample Type</b>            | Sample       | <b>Position</b>      | P1-B7                |
| <b>Instrument Name</b>        | Instrument 1 | <b>User Name</b>     |                      |
| <b>Acq Method</b>             | ESI pos.m    | <b>Acquired Time</b> | 3/9/2022 11:09:07 AM |
| <b>IRM Calibration Status</b> | Success      | <b>DA Method</b>     | Default.m            |
| <b>Comment</b>                |              |                      |                      |

|                     |      |                       |                             |
|---------------------|------|-----------------------|-----------------------------|
| <b>Sample Group</b> |      | <b>Info.</b>          |                             |
| <b>Stream Name</b>  | LC 1 | <b>Acquisition SW</b> | 6200 series TOF/6500 series |
|                     |      | <b>Version</b>        | Q-TOF B.08.00 (B8058.0)     |

## User Chromatograms

**Fragmentor Voltage** 90 **Collision Energy** 0 **Ionization Mode** ESI

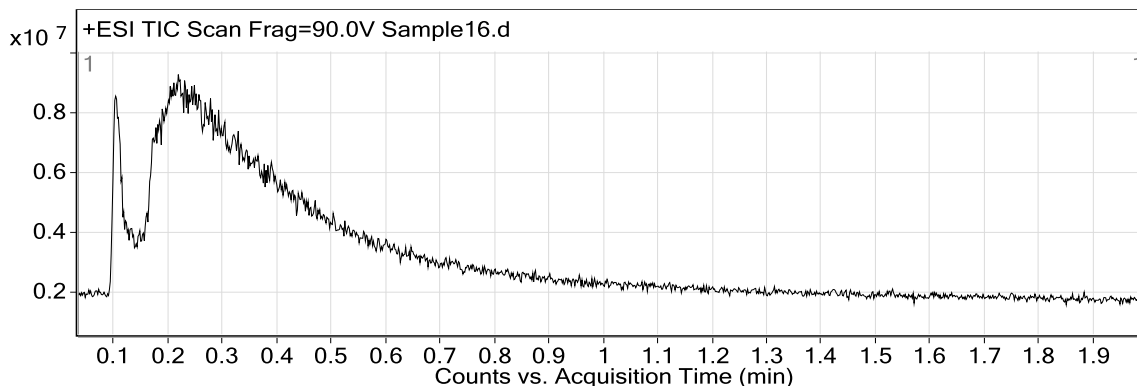

## User Spectra

**Fragmentor Voltage** 90 **Collision Energy** 0 **Ionization Mode** ESI

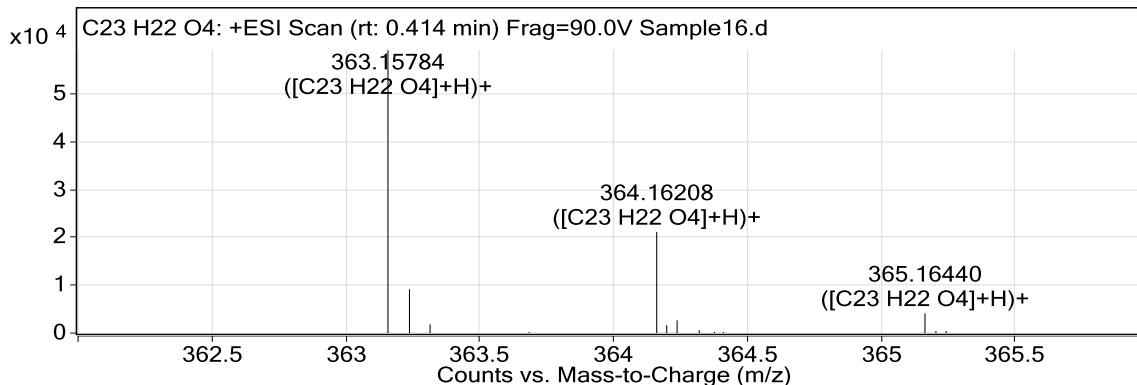

## Peak List

| m/z       | z | Abund     | Formula | Ion |
|-----------|---|-----------|---------|-----|
| 102.12756 |   | 2945.22   |         |     |
| 125.98457 |   | 783.82    |         |     |
| 130.15796 |   | 742.28    |         |     |
| 181.10141 |   | 905.6     |         |     |
| 195.06375 |   | 1106.88   |         |     |
| 221.56711 | 2 | 747.25    |         |     |
| 291.18562 |   | 691.53    |         |     |
| 307.17905 | 1 | 103517.45 |         |     |
| 308.18178 | 1 | 19130.04  |         |     |

## Qualitative Analysis Report

|           |   |           |            |        |
|-----------|---|-----------|------------|--------|
| 308.21898 |   | 1137.33   |            |        |
| 308.23922 |   | 996.13    |            |        |
| 309.18582 | 1 | 1971      |            |        |
| 321.14668 | 1 | 3739.52   |            |        |
| 321.19275 | 1 | 4037.01   |            |        |
| 322.15162 | 1 | 1106.97   |            |        |
| 322.19881 | 1 | 1032.07   |            |        |
| 343.15318 | 1 | 1291.42   |            |        |
| 345.15573 | 1 | 612.3     |            |        |
| 349.22543 | 1 | 5869.33   |            |        |
| 350.22794 | 1 | 1790.7    |            |        |
| 363.15784 | 1 | 59149.29  | C23 H22 O4 | (M+H)+ |
| 363.23827 | 1 | 9166.27   |            |        |
| 363.31525 | 1 | 1817.15   |            |        |
| 364.16208 | 1 | 21140.68  | C23 H22 O4 | (M+H)+ |
| 364.19952 | 1 | 1653.09   |            |        |
| 364.23819 | 1 | 2663.05   |            |        |
| 365.1644  | 1 | 4128.81   | C23 H22 O4 | (M+H)+ |
| 366.16846 | 1 | 609.1     | C23 H22 O4 | (M+H)+ |
| 382.13345 | 2 | 841.99    |            |        |
| 385.13935 | 1 | 95891.88  |            |        |
| 386.14362 | 1 | 34162.48  |            |        |
| 386.19686 | 1 | 1896.67   |            |        |
| 387.14709 | 1 | 7685.48   |            |        |
| 387.19343 | 1 | 770.49    |            |        |
| 388.15126 |   | 1207.02   |            |        |
| 401.11265 | 1 | 42182.68  |            |        |
| 401.17631 |   | 2134.72   |            |        |
| 401.28242 |   | 749.3     |            |        |
| 402.11738 | 1 | 15369.4   |            |        |
| 403.11448 | 1 | 5534.15   |            |        |
| 404.12059 |   | 1329.2    |            |        |
| 436.24255 |   | 807.16    |            |        |
| 447.11233 |   | 666.02    |            |        |
| 492.30606 |   | 639.58    |            |        |
| 607.24277 | 1 | 655.24    |            |        |
| 745.27261 | 1 | 672.37    |            |        |
| 747.29091 | 1 | 142407.69 |            |        |
| 748.29489 | 1 | 119083.65 |            |        |
| 749.29819 | 1 | 46054.21  |            |        |
| 749.37909 | 1 | 3175.15   |            |        |
| 749.46449 | 1 | 1583.78   |            |        |
| 749.52642 | 1 | 1569.51   |            |        |
| 749.61644 |   | 1081.16   |            |        |
| 750.30255 | 1 | 10341.42  |            |        |
| 750.37895 | 1 | 1222.28   |            |        |
| 751.30549 | 1 | 2191.97   |            |        |
| 763.2602  | 1 | 1127.79   |            |        |
| 764.26759 | 1 | 900.48    |            |        |
| 831.37585 | 1 | 784.44    |            |        |
| 833.37139 | 1 | 794.06    |            |        |
| 834.37802 | 1 | 652.62    |            |        |

# Qualitative Analysis Report

## Formula Calculator Element Limits

| Element | Min | Max |
|---------|-----|-----|
| C       | 3   | 23  |
| H       | 0   | 22  |
| O       | 0   | 4   |

## Formula Calculator Results

| Formula    | Best | Mass     | Tgt Mass  | Diff (ppm) | Ion Species | Score |
|------------|------|----------|-----------|------------|-------------|-------|
| C23 H22 O4 | TRUE | 362.1508 | 362.15181 | 2.77       | C23 H23 O4  | 83.81 |

--- End Of Report ---

# Qualitative Analysis Report

|                               |              |                      |                      |
|-------------------------------|--------------|----------------------|----------------------|
| <b>Data Filename</b>          | Sample17.d   | <b>Sample Name</b>   | Sample17             |
| <b>Sample Type</b>            | Sample       | <b>Position</b>      | P1-B8                |
| <b>Instrument Name</b>        | Instrument 1 | <b>User Name</b>     |                      |
| <b>Acq Method</b>             | ESI pos.m    | <b>Acquired Time</b> | 3/9/2022 11:11:48 AM |
| <b>IRM Calibration Status</b> | Success      | <b>DA Method</b>     | Default.m            |
| <b>Comment</b>                |              |                      |                      |

|                     |      |                       |                             |
|---------------------|------|-----------------------|-----------------------------|
| <b>Sample Group</b> |      | <b>Info.</b>          |                             |
| <b>Stream Name</b>  | LC 1 | <b>Acquisition SW</b> | 6200 series TOF/6500 series |
|                     |      | <b>Version</b>        | Q-TOF B.08.00 (B8058.0)     |

## User Chromatograms

**Fragmentor Voltage** 90 **Collision Energy** 0 **Ionization Mode** ESI

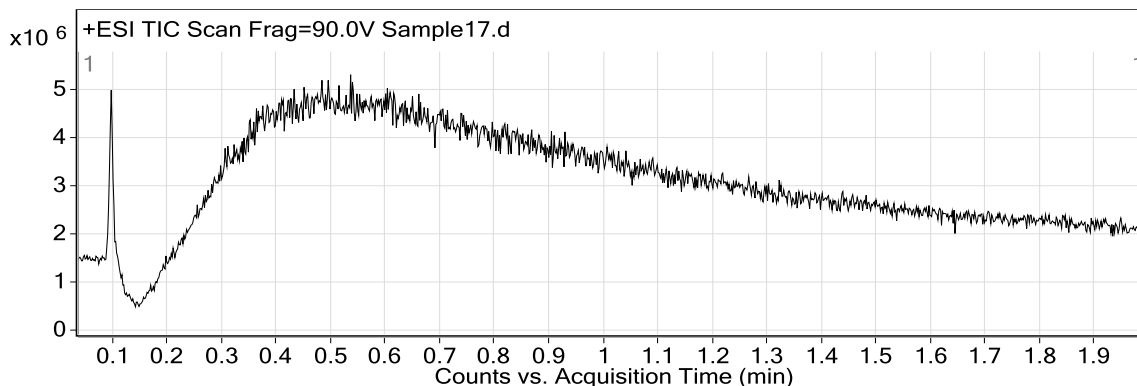

## User Spectra

**Fragmentor Voltage** 90 **Collision Energy** 0 **Ionization Mode** ESI

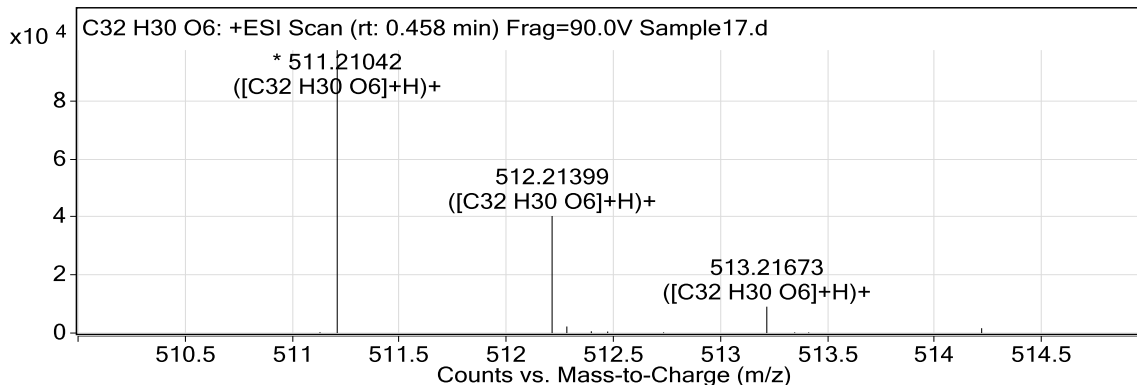

## Peak List

| m/z       | z | Abund    | Formula | Ion |
|-----------|---|----------|---------|-----|
| 107.96734 |   | 500.01   |         |     |
| 125.9838  |   | 676.35   |         |     |
| 167.01227 |   | 606.73   |         |     |
| 307.17866 | 1 | 19322.92 |         |     |
| 307.22955 | 1 | 1230.27  |         |     |
| 308.18202 | 1 | 4525.8   |         |     |
| 321.19427 |   | 976.14   |         |     |
| 349.22693 | 1 | 1636.54  |         |     |
| 350.22325 | 1 | 534.64   |         |     |



## Qualitative Analysis Report

|            |   |           |            |        |
|------------|---|-----------|------------|--------|
| 363.23939  | 1 | 2999.52   |            |        |
| 364.24271  | 1 | 935.28    |            |        |
| 481.19618  | 1 | 1654.6    |            |        |
| 482.20587  | 1 | 713.68    |            |        |
| 511.21042  | 1 | 97465.25  | C32 H30 O6 | (M+H)+ |
| 512.21399  | 1 | 40315.63  | C32 H30 O6 | (M+H)+ |
| 512.28276  |   | 2259.03   |            |        |
| 512.39714  |   | 614.68    |            |        |
| 512.47352  |   | 529.07    |            |        |
| 513.21673  | 1 | 9084.87   | C32 H30 O6 | (M+H)+ |
| 514.22014  | 1 | 1669.16   | C32 H30 O6 | (M+H)+ |
| 533.19158  | 1 | 15188.03  |            |        |
| 533.24722  |   | 1373.29   |            |        |
| 534.19516  | 1 | 7017.84   |            |        |
| 534.27362  |   | 538.56    |            |        |
| 535.1969   | 1 | 1754.74   |            |        |
| 549.16533  | 1 | 11120.05  |            |        |
| 549.21997  |   | 970.52    |            |        |
| 550.16965  | 1 | 4789.67   |            |        |
| 551.16948  | 1 | 1856.95   |            |        |
| 552.17674  |   | 605.91    |            |        |
| 612.32592  | 1 | 1391.25   |            |        |
| 613.33651  | 1 | 645.34    |            |        |
| 1013.38323 | 1 | 4844.36   |            |        |
| 1014.38749 | 1 | 4709.83   |            |        |
| 1014.47425 |   | 518.06    |            |        |
| 1015.38837 | 1 | 1816.57   |            |        |
| 1016.39583 | 1 | 727.57    |            |        |
| 1027.40678 | 1 | 490.72    |            |        |
| 1040.88561 | 2 | 603.03    |            |        |
| 1041.38956 | 2 | 498.32    |            |        |
| 1043.39582 | 1 | 136876    |            |        |
| 1044.39937 | 1 | 127383.17 |            |        |
| 1045.40273 | 1 | 56191.57  |            |        |
| 1045.66793 | 1 | 966.53    |            |        |
| 1045.77332 |   | 916.31    |            |        |
| 1045.8811  |   | 581.45    |            |        |
| 1046.40469 | 1 | 16559.3   |            |        |
| 1046.51039 | 1 | 1490.47   |            |        |
| 1046.61047 |   | 553.01    |            |        |
| 1047.40522 | 1 | 3614.69   |            |        |
| 1047.48435 | 1 | 674.46    |            |        |
| 1048.40736 | 1 | 889.51    |            |        |
| 1059.37008 | 1 | 8817.16   |            |        |
| 1059.46224 | 1 | 956.27    |            |        |
| 1060.37034 | 1 | 7597.4    |            |        |
| 1060.46943 | 1 | 913.66    |            |        |
| 1061.37893 | 1 | 4624.5    |            |        |
| 1062.38179 | 1 | 1763.08   |            |        |
| 1063.38211 | 1 | 487.71    |            |        |
| 1073.40072 | 1 | 694.25    |            |        |
| 1074.41709 | 1 | 789.33    |            |        |

# Qualitative Analysis Report

## Formula Calculator Element Limits

| Element | Min | Max |
|---------|-----|-----|
| C       | 3   | 32  |
| H       | 0   | 30  |
| O       | 0   | 6   |

## Formula Calculator Results

| Formula    | Best | Mass      | Tgt Mass  | Diff (ppm) | Ion Species | Score |
|------------|------|-----------|-----------|------------|-------------|-------|
| C32 H30 O6 | TRUE | 510.20319 | 510.20424 | 2.05       | C32 H31 O6  | 93.91 |

--- End Of Report ---

# Qualitative Analysis Report

|                               |              |                      |                      |
|-------------------------------|--------------|----------------------|----------------------|
| <b>Data Filename</b>          | Sample18.d   | <b>Sample Name</b>   | Sample18             |
| <b>Sample Type</b>            | Sample       | <b>Position</b>      | P1-B9                |
| <b>Instrument Name</b>        | Instrument 1 | <b>User Name</b>     |                      |
| <b>Acq Method</b>             | ESI pos.m    | <b>Acquired Time</b> | 3/9/2022 11:14:27 AM |
| <b>IRM Calibration Status</b> | Success      | <b>DA Method</b>     | Default.m            |
| <b>Comment</b>                |              |                      |                      |

|                     |      |                       |                             |
|---------------------|------|-----------------------|-----------------------------|
| <b>Sample Group</b> |      | <b>Info.</b>          |                             |
| <b>Stream Name</b>  | LC 1 | <b>Acquisition SW</b> | 6200 series TOF/6500 series |
|                     |      | <b>Version</b>        | Q-TOF B.08.00 (B8058.0)     |

## User Chromatograms

**Fragmentor Voltage** 90 **Collision Energy** 0 **Ionization Mode** ESI

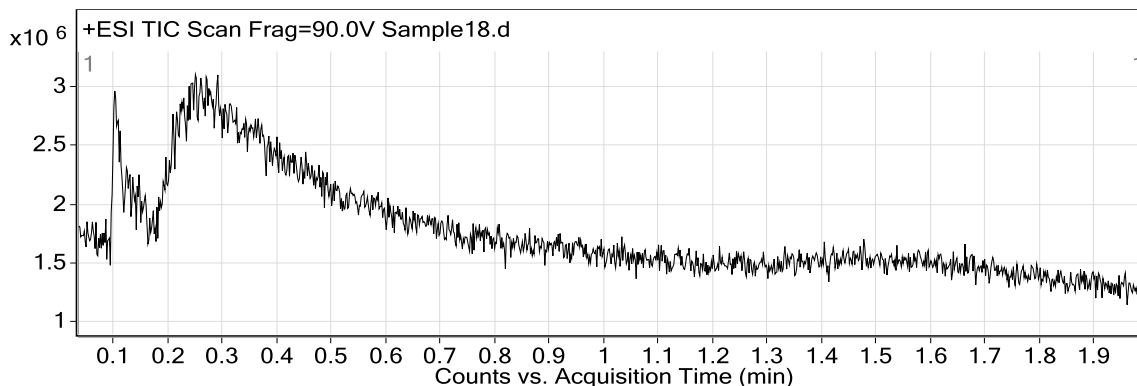

## User Spectra

**Fragmentor Voltage** 90 **Collision Energy** 0 **Ionization Mode** ESI

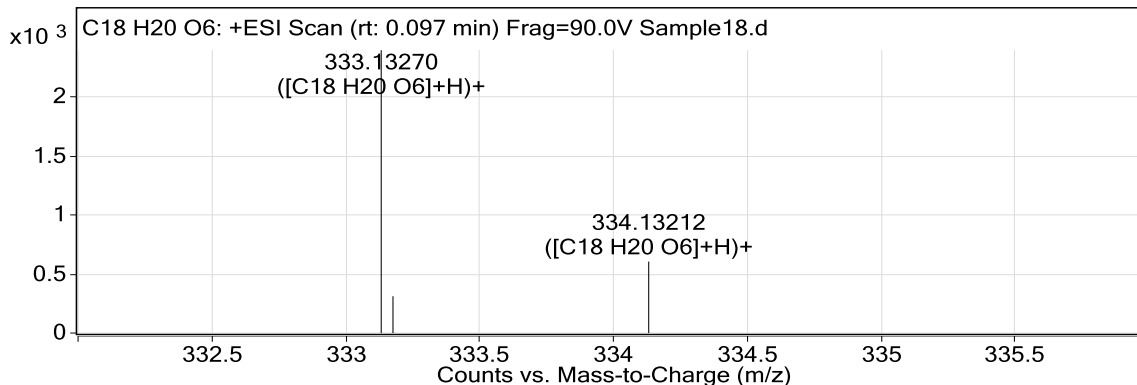

## Peak List

| m/z       | z | Abund   | Formula | Ion |
|-----------|---|---------|---------|-----|
| 102.12664 |   | 2522.18 |         |     |
| 107.96618 |   | 746.24  |         |     |
| 125.98357 |   | 1003.48 |         |     |
| 130.15675 |   | 728.56  |         |     |
| 167.00923 |   | 660.35  |         |     |
| 171.09772 |   | 435.92  |         |     |
| 183.99976 |   | 466.02  |         |     |
| 185.1128  |   | 2215.67 |         |     |
| 203.11411 |   | 441.67  |         |     |

## Qualitative Analysis Report

|            |   |          |            |        |
|------------|---|----------|------------|--------|
| 213.14468  |   | 672      |            |        |
| 307.17801  | 1 | 17172.96 |            |        |
| 307.21282  | 1 | 1159.34  |            |        |
| 307.23427  |   | 982.65   |            |        |
| 308.18091  | 1 | 3580.65  |            |        |
| 309.12883  |   | 537.75   |            |        |
| 321.19424  |   | 1270.2   |            |        |
| 333.1327   | 1 | 2398.59  | C18 H20 O6 | (M+H)+ |
| 334.13212  | 1 | 606      | C18 H20 O6 | (M+H)+ |
| 349.2256   | 1 | 2111.49  |            |        |
| 350.22943  | 1 | 526.01   |            |        |
| 363.15958  |   | 1190.74  |            |        |
| 363.23955  | 1 | 3039.15  |            |        |
| 364.15997  |   | 731.13   |            |        |
| 364.23888  | 1 | 1075.01  |            |        |
| 371.08318  | 1 | 1935.93  |            |        |
| 385.13708  | 1 | 5740.37  |            |        |
| 385.19717  | 1 | 608.82   |            |        |
| 386.14454  | 1 | 2502.04  |            |        |
| 387.14738  | 1 | 571.65   |            |        |
| 401.11097  | 1 | 3764.76  |            |        |
| 402.11247  | 1 | 1381.82  |            |        |
| 403.11205  | 1 | 728.16   |            |        |
| 503.179    | 1 | 807.69   |            |        |
| 511.20777  | 1 | 10346.14 |            |        |
| 511.26093  |   | 812.86   |            |        |
| 512.21105  | 1 | 3989.4   |            |        |
| 513.2129   | 1 | 697.31   |            |        |
| 533.1905   | 1 | 27104.87 |            |        |
| 533.25283  | 1 | 1970.37  |            |        |
| 533.31841  |   | 788.71   |            |        |
| 533.38312  |   | 614.32   |            |        |
| 534.19542  | 1 | 10876.55 |            |        |
| 534.25811  | 1 | 1007.04  |            |        |
| 535.19712  | 1 | 2735.02  |            |        |
| 549.1646   | 1 | 20746.87 |            |        |
| 549.22865  |   | 1570.4   |            |        |
| 550.16669  | 1 | 8074.81  |            |        |
| 551.16982  | 1 | 2710.8   |            |        |
| 552.16958  |   | 783.18   |            |        |
| 612.32736  |   | 654.37   |            |        |
| 895.33759  | 1 | 2664.25  |            |        |
| 896.34583  | 1 | 2458.69  |            |        |
| 897.35097  | 1 | 1641.63  |            |        |
| 898.35043  | 1 | 457.91   |            |        |
| 1043.39076 | 1 | 5684.02  |            |        |
| 1043.48558 |   | 688.1    |            |        |
| 1044.3938  | 1 | 5222.57  |            |        |
| 1045.39682 | 1 | 2320.35  |            |        |
| 1046.39612 | 1 | 545.5    |            |        |
| 1059.35707 | 1 | 965.13   |            |        |
| 1060.36544 | 1 | 817.37   |            |        |

# Qualitative Analysis Report

## Formula Calculator Element Limits

| Element | Min | Max |
|---------|-----|-----|
| C       | 3   | 18  |
| H       | 0   | 20  |
| O       | 0   | 6   |

## Formula Calculator Results

| Formula    | Best | Mass      | Tgt Mass  | Diff (ppm) | Ion Species | Score |
|------------|------|-----------|-----------|------------|-------------|-------|
| C18 H20 O6 | TRUE | 332.12462 | 332.12599 | 4.11       | C18 H21 O6  | 64.78 |

--- End Of Report ---

# Qualitative Analysis Report

|                               |              |                      |                      |
|-------------------------------|--------------|----------------------|----------------------|
| <b>Data Filename</b>          | Sample19.d   | <b>Sample Name</b>   | Sample19             |
| <b>Sample Type</b>            | Sample       | <b>Position</b>      | P1-C1                |
| <b>Instrument Name</b>        | Instrument 1 | <b>User Name</b>     |                      |
| <b>Acq Method</b>             | ESI pos.m    | <b>Acquired Time</b> | 3/9/2022 11:17:09 AM |
| <b>IRM Calibration Status</b> | Success      | <b>DA Method</b>     | Default.m            |
| <b>Comment</b>                |              |                      |                      |

|                     |      |                       |                             |
|---------------------|------|-----------------------|-----------------------------|
| <b>Sample Group</b> |      | <b>Info.</b>          |                             |
| <b>Stream Name</b>  | LC 1 | <b>Acquisition SW</b> | 6200 series TOF/6500 series |
|                     |      | <b>Version</b>        | Q-TOF B.08.00 (B8058.0)     |

## User Chromatograms

**Fragmentor Voltage** 90 **Collision Energy** 0 **Ionization Mode** ESI

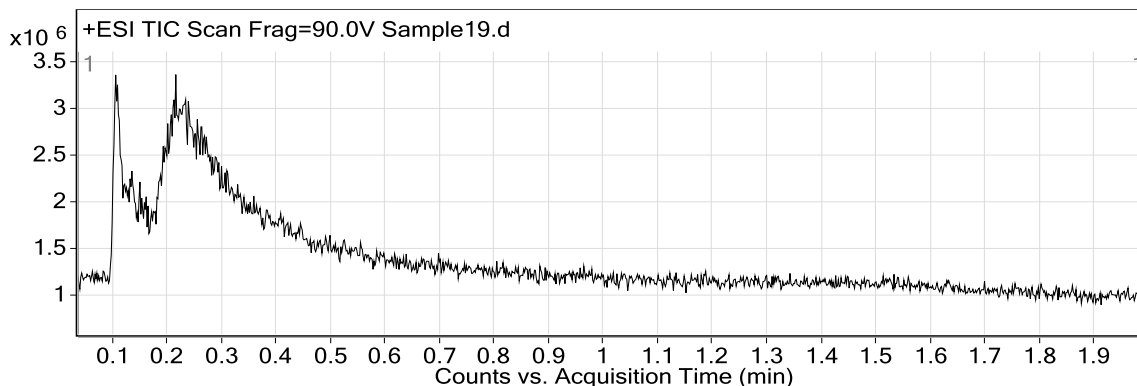

## User Spectra

**Fragmentor Voltage** 90 **Collision Energy** 0 **Ionization Mode** ESI

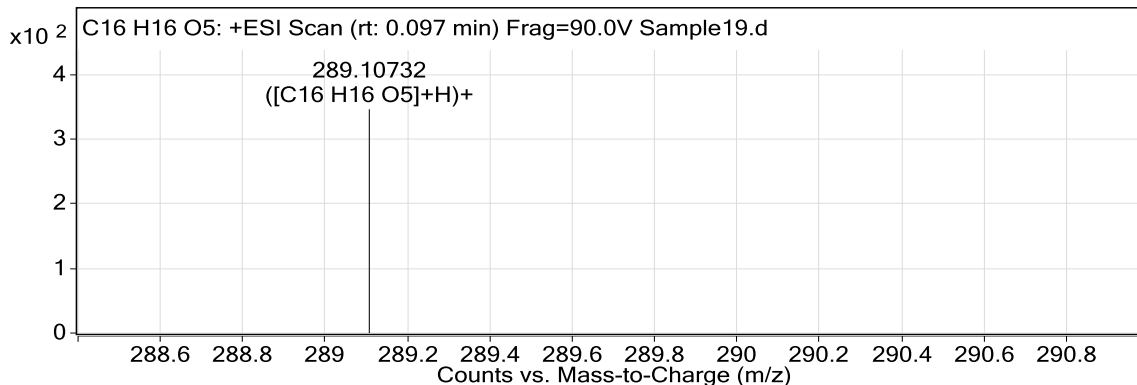

## Peak List

| m/z       | z | Abund   |
|-----------|---|---------|
| 100.0749  |   | 469.85  |
| 102.03186 |   | 609.42  |
| 102.12671 |   | 2928    |
| 105.04248 |   | 439.14  |
| 107.96684 |   | 483.19  |
| 125.98546 |   | 1180.36 |
| 130.15808 |   | 1027.04 |
| 167.0093  |   | 794.81  |
| 171.09708 |   | 394.6   |

## Qualitative Analysis Report

|            |   |          |
|------------|---|----------|
| 184.00156  |   | 528.94   |
| 185.11346  | 1 | 2744.18  |
| 186.11497  | 1 | 425.84   |
| 203.11451  |   | 367.97   |
| 213.109    |   | 472.27   |
| 213.14374  |   | 527.19   |
| 217.09891  |   | 358.32   |
| 258.27853  |   | 451.68   |
| 284.329    |   | 437.78   |
| 307.17749  | 1 | 11245.09 |
| 307.22488  |   | 788.57   |
| 308.18052  | 1 | 2141.54  |
| 309.129    |   | 591.88   |
| 321.194    |   | 556.63   |
| 349.22606  | 1 | 1326.68  |
| 350.23282  | 1 | 447.01   |
| 363.15645  | 1 | 779.38   |
| 363.23959  | 1 | 2634.57  |
| 364.15738  | 1 | 375.68   |
| 364.24481  | 1 | 592.01   |
| 371.084    |   | 405.21   |
| 383.19465  |   | 464.37   |
| 385.13911  | 1 | 5489.08  |
| 385.19182  |   | 679.62   |
| 386.1403   | 1 | 2119.98  |
| 387.14668  | 1 | 558.02   |
| 401.11115  | 1 | 3478.04  |
| 402.116    | 1 | 1089.88  |
| 403.11907  | 1 | 491.72   |
| 406.32807  | 1 | 833.13   |
| 511.20959  | 1 | 2963.34  |
| 512.21193  | 1 | 1187.21  |
| 513.21604  | 1 | 475.39   |
| 533.18927  | 1 | 11947.58 |
| 534.19456  | 1 | 5150     |
| 534.25861  |   | 494.04   |
| 535.1983   | 1 | 1325.62  |
| 549.16206  | 1 | 9304.86  |
| 549.22283  |   | 864.08   |
| 550.16922  | 1 | 3692.06  |
| 551.17026  | 1 | 1919.79  |
| 552.16603  |   | 537.29   |
| 553.45368  |   | 374.72   |
| 569.42907  | 1 | 1594.17  |
| 570.43621  | 1 | 674.17   |
| 685.42562  |   | 469.06   |
| 701.40061  |   | 391.03   |
| 895.33947  | 1 | 820.14   |
| 896.34496  | 1 | 725.05   |
| 1043.3951  | 1 | 722.42   |
| 1044.40219 | 1 | 650.44   |
| 1045.40592 | 1 | 360.78   |

# Qualitative Analysis Report

## Formula Calculator Element Limits

| Element | Min | Max |
|---------|-----|-----|
| C       | 3   | 16  |
| H       | 0   | 16  |
| O       | 0   | 5   |

## Formula Calculator Results

| Formula    | Best | Mass      | Tgt Mass  | Diff (ppm) | Ion Species | Score |
|------------|------|-----------|-----------|------------|-------------|-------|
| C16 H16 O5 | TRUE | 288.10004 | 288.09977 | -0.92      | C16 H17 O5  | 47.36 |

--- End Of Report ---



# Qualitative Analysis Report

|                               |              |                      |                      |
|-------------------------------|--------------|----------------------|----------------------|
| <b>Data Filename</b>          | Sample20.d   | <b>Sample Name</b>   | Sample20             |
| <b>Sample Type</b>            | Sample       | <b>Position</b>      | P1-C2                |
| <b>Instrument Name</b>        | Instrument 1 | <b>User Name</b>     |                      |
| <b>Acq Method</b>             | ESI pos.m    | <b>Acquired Time</b> | 3/9/2022 11:19:50 AM |
| <b>IRM Calibration Status</b> | Success      | <b>DA Method</b>     | Default.m            |
| <b>Comment</b>                |              |                      |                      |

|                     |      |                       |                             |
|---------------------|------|-----------------------|-----------------------------|
| <b>Sample Group</b> |      | <b>Info.</b>          |                             |
| <b>Stream Name</b>  | LC 1 | <b>Acquisition SW</b> | 6200 series TOF/6500 series |
|                     |      | <b>Version</b>        | Q-TOF B.08.00 (B8058.0)     |

## User Chromatograms

**Fragmentor Voltage** 90 **Collision Energy** 0 **Ionization Mode** ESI

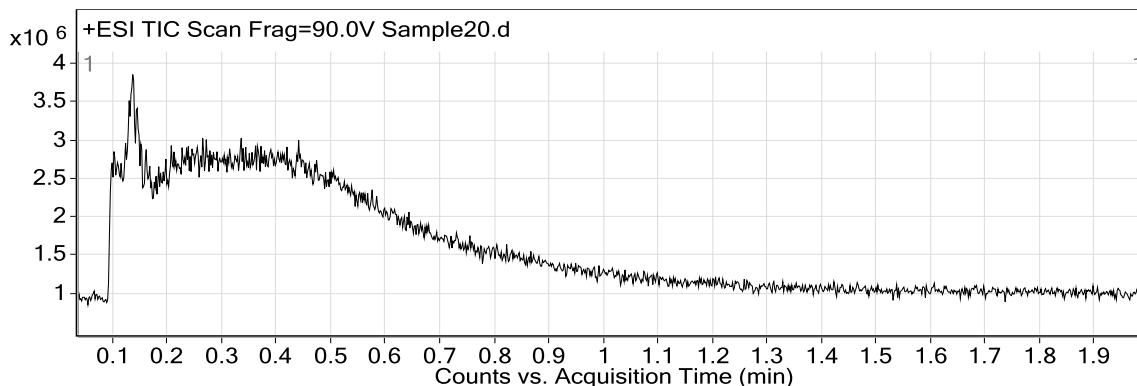

## User Spectra

**Fragmentor Voltage** 90 **Collision Energy** 0 **Ionization Mode** ESI

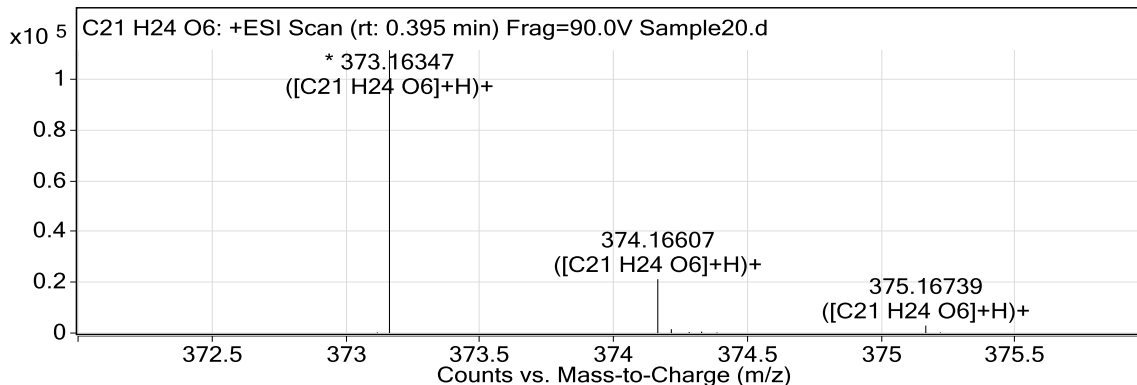

## Peak List

| m/z       | z | Abund   | Formula | Ion |
|-----------|---|---------|---------|-----|
| 102.1265  |   | 2500.17 |         |     |
| 107.96478 |   | 986.74  |         |     |
| 125.98485 |   | 521.12  |         |     |
| 130.15965 |   | 631.5   |         |     |
| 185.11416 |   | 672.71  |         |     |
| 193.08337 |   | 715.02  |         |     |
| 206.0561  |   | 553.34  |         |     |
| 284.33137 |   | 504.64  |         |     |
| 307.17879 | 1 | 4373.85 |         |     |

## Qualitative Analysis Report

|           |   |           |            |        |
|-----------|---|-----------|------------|--------|
| 308.18448 | 1 | 961.98    |            |        |
| 341.13668 | 1 | 1612.97   |            |        |
| 349.22499 |   | 806.78    |            |        |
| 363.15722 |   | 521.28    |            |        |
| 363.23915 | 1 | 1331.43   |            |        |
| 373.16347 | 1 | 111589.92 | C21 H24 O6 | (M+H)+ |
| 374.16607 | 1 | 21234.11  | C21 H24 O6 | (M+H)+ |
| 374.21673 |   | 1529.41   |            |        |
| 374.32981 |   | 575.17    |            |        |
| 375.16739 | 1 | 2940.02   | C21 H24 O6 | (M+H)+ |
| 385.13974 | 1 | 3309.42   |            |        |
| 386.14136 | 1 | 987.16    |            |        |
| 392.13913 | 2 | 718.46    |            |        |
| 395.1445  | 1 | 13323.19  |            |        |
| 395.19637 | 1 | 916       |            |        |
| 396.14681 | 1 | 2342.51   |            |        |
| 401.11308 | 1 | 1323.28   |            |        |
| 402.11973 | 1 | 527.78    |            |        |
| 406.32785 | 1 | 1177.58   |            |        |
| 411.11831 | 1 | 57722.11  |            |        |
| 411.18202 | 1 | 3140.46   |            |        |
| 411.29104 |   | 1632.17   |            |        |
| 412.12143 | 1 | 12151.99  |            |        |
| 412.16919 | 1 | 1078.59   |            |        |
| 413.11676 | 1 | 4437.99   |            |        |
| 413.19146 | 1 | 4039.13   |            |        |
| 413.24932 |   | 499.76    |            |        |
| 414.1199  | 1 | 650.95    |            |        |
| 414.19538 | 1 | 1209.18   |            |        |
| 435.17343 | 1 | 1966.47   |            |        |
| 436.16858 | 1 | 585.95    |            |        |
| 451.15111 | 1 | 4368.05   |            |        |
| 452.15215 | 1 | 1187.39   |            |        |
| 453.15395 | 1 | 492.94    |            |        |
| 457.10893 |   | 596.49    |            |        |
| 480.12338 |   | 702.11    |            |        |
| 511.20766 | 1 | 2326.92   |            |        |
| 512.21025 | 1 | 975.56    |            |        |
| 533.19081 | 1 | 9621.98   |            |        |
| 533.25272 |   | 899.04    |            |        |
| 534.19621 | 1 | 5408.8    |            |        |
| 535.19723 | 1 | 1234.8    |            |        |
| 549.16453 | 1 | 4426      |            |        |
| 550.16824 | 1 | 2259.02   |            |        |
| 551.16603 | 1 | 603.55    |            |        |
| 578.20815 | 2 | 1424.53   |            |        |
| 578.71587 | 2 | 947.56    |            |        |
| 767.28778 | 1 | 995.57    |            |        |
| 768.29801 | 1 | 537.56    |            |        |
| 783.26404 | 1 | 1151.29   |            |        |
| 784.26785 | 1 | 512.55    |            |        |
| 805.24341 | 1 | 569.45    |            |        |

# Qualitative Analysis Report

## Formula Calculator Element Limits

| Element | Min | Max |
|---------|-----|-----|
| C       | 3   | 21  |
| H       | 0   | 24  |
| O       | 0   | 6   |

## Formula Calculator Results

| Formula    | Best | Mass      | Tgt Mass  | Diff (ppm) | Ion Species | Score |
|------------|------|-----------|-----------|------------|-------------|-------|
| C21 H24 O6 | TRUE | 372.15603 | 372.15729 | 3.39       | C21 H25 O6  | 91.25 |

--- End Of Report ---

# Qualitative Analysis Report

|                               |              |                      |                      |
|-------------------------------|--------------|----------------------|----------------------|
| <b>Data Filename</b>          | Sample21.d   | <b>Sample Name</b>   | Sample21             |
| <b>Sample Type</b>            | Sample       | <b>Position</b>      | P1-C3                |
| <b>Instrument Name</b>        | Instrument 1 | <b>User Name</b>     |                      |
| <b>Acq Method</b>             | ESI pos.m    | <b>Acquired Time</b> | 3/9/2022 11:22:31 AM |
| <b>IRM Calibration Status</b> | Success      | <b>DA Method</b>     | Default.m            |
| <b>Comment</b>                |              |                      |                      |

|                     |      |                       |                             |
|---------------------|------|-----------------------|-----------------------------|
| <b>Sample Group</b> |      | <b>Info.</b>          |                             |
| <b>Stream Name</b>  | LC 1 | <b>Acquisition SW</b> | 6200 series TOF/6500 series |
|                     |      | <b>Version</b>        | Q-TOF B.08.00 (B8058.0)     |

## User Chromatograms

**Fragmentor Voltage** 90 **Collision Energy** 0 **Ionization Mode** ESI

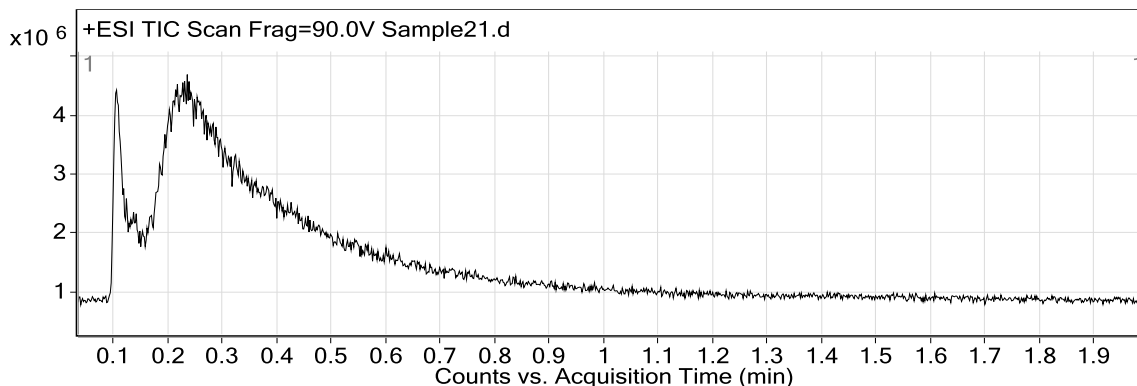

## User Spectra

**Fragmentor Voltage** 90 **Collision Energy** 0 **Ionization Mode** ESI

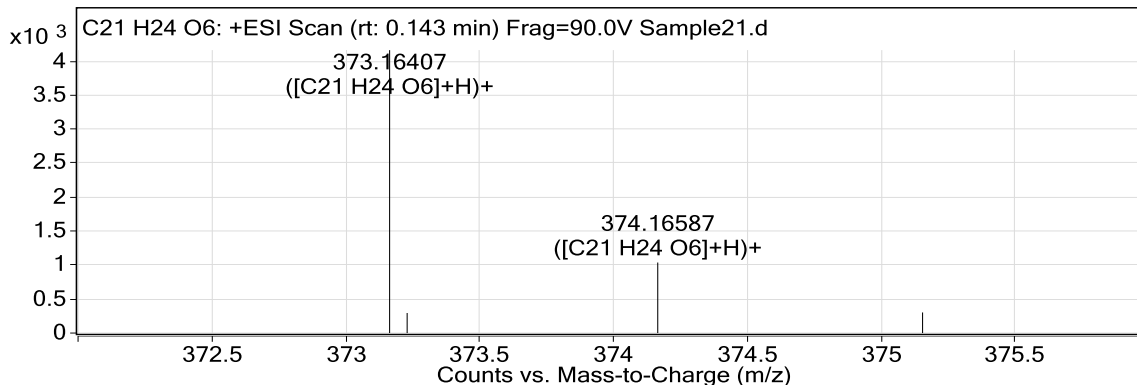

## Peak List

| m/z       | z | Abund    | Formula | Ion |
|-----------|---|----------|---------|-----|
| 102.12654 |   | 750.23   |         |     |
| 130.15818 |   | 2807.82  |         |     |
| 203.11652 | 1 | 2220.51  |         |     |
| 204.12162 | 1 | 553.97   |         |     |
| 230.24447 |   | 525.72   |         |     |
| 258.27527 |   | 1184.81  |         |     |
| 284.32938 | 1 | 14672.08 |         |     |
| 284.36933 | 2 | 974.07   |         |     |
| 285.3322  | 1 | 2741.08  |         |     |

## Qualitative Analysis Report

|           |   |          |            |        |
|-----------|---|----------|------------|--------|
| 304.29851 | 1 | 1331.05  |            |        |
| 325.22617 |   | 715.65   |            |        |
| 332.32832 | 1 | 1659.16  |            |        |
| 371.14625 |   | 980.56   |            |        |
| 373.16407 | 1 | 4162.1   | C21 H24 O6 | (M+H)+ |
| 374.16587 | 1 | 1037.4   | C21 H24 O6 | (M+H)+ |
| 387.14138 | 1 | 4511.81  |            |        |
| 388.14261 | 1 | 924.06   |            |        |
| 389.15655 |   | 1018.4   |            |        |
| 403.13156 |   | 643.31   |            |        |
| 409.16339 | 1 | 781.76   |            |        |
| 411.17804 |   | 607.56   |            |        |
| 413.19383 | 1 | 10206.87 |            |        |
| 413.24922 |   | 857.54   |            |        |
| 414.19702 | 1 | 2210.41  |            |        |
| 415.202   | 1 | 707.81   |            |        |
| 427.17331 | 1 | 4271.63  |            |        |
| 428.17256 | 1 | 767.19   |            |        |
| 429.18686 | 1 | 1198.06  |            |        |
| 445.18492 |   | 605.06   |            |        |
| 447.17821 | 1 | 1002.8   |            |        |
| 453.22552 | 1 | 4700.72  |            |        |
| 453.27196 |   | 544.43   |            |        |
| 454.22984 | 1 | 1253.39  |            |        |
| 469.21781 |   | 1481.58  |            |        |
| 483.16353 | 1 | 616.17   |            |        |
| 491.20122 |   | 543.27   |            |        |
| 517.3696  |   | 567.2    |            |        |
| 561.39695 |   | 604.9    |            |        |
| 605.41072 |   | 560.2    |            |        |
| 663.45015 | 1 | 1042.84  |            |        |
| 764.56778 | 1 | 959.59   |            |        |
| 765.28898 | 1 | 749.54   |            |        |
| 765.57059 | 1 | 576.35   |            |        |
| 779.31114 | 1 | 700.49   |            |        |
| 797.31068 | 1 | 3302.77  |            |        |
| 798.31415 | 1 | 1622.4   |            |        |
| 813.31031 | 1 | 1032.8   |            |        |
| 819.32691 | 1 | 2693.06  |            |        |
| 820.334   | 1 | 1732.76  |            |        |
| 821.33628 | 1 | 818.9    |            |        |
| 835.28459 |   | 655.27   |            |        |
| 836.29019 |   | 653.02   |            |        |
| 837.34097 | 1 | 2415.27  |            |        |
| 838.34542 | 1 | 1512.76  |            |        |
| 839.34772 | 1 | 669.46   |            |        |
| 853.3353  | 1 | 688.67   |            |        |
| 859.32438 | 1 | 1375.66  |            |        |
| 860.32937 | 1 | 903.48   |            |        |
| 861.33527 | 1 | 567.52   |            |        |
| 875.30422 | 1 | 904.04   |            |        |
| 877.3197  | 1 | 648.24   |            |        |

# Qualitative Analysis Report

## Formula Calculator Element Limits

| Element | Min | Max |
|---------|-----|-----|
| C       | 3   | 21  |
| H       | 0   | 24  |
| O       | 0   | 6   |

## Formula Calculator Results

| Formula    | Best | Mass      | Tgt Mass  | Diff (ppm) | Ion Species | Score |
|------------|------|-----------|-----------|------------|-------------|-------|
| C21 H24 O6 | TRUE | 372.15569 | 372.15729 | 4.3        | C21 H25 O6  | 77.87 |

--- End Of Report ---

# Qualitative Analysis Report

|                               |              |                      |                      |
|-------------------------------|--------------|----------------------|----------------------|
| <b>Data Filename</b>          | Sample22.d   | <b>Sample Name</b>   | Sample22             |
| <b>Sample Type</b>            | Sample       | <b>Position</b>      | P1-C4                |
| <b>Instrument Name</b>        | Instrument 1 | <b>User Name</b>     |                      |
| <b>Acq Method</b>             | ESI pos.m    | <b>Acquired Time</b> | 3/9/2022 11:25:12 AM |
| <b>IRM Calibration Status</b> | Success      | <b>DA Method</b>     | Default.m            |
| <b>Comment</b>                |              |                      |                      |

|                     |      |                       |                             |
|---------------------|------|-----------------------|-----------------------------|
| <b>Sample Group</b> |      | <b>Info.</b>          |                             |
| <b>Stream Name</b>  | LC 1 | <b>Acquisition SW</b> | 6200 series TOF/6500 series |
|                     |      | <b>Version</b>        | Q-TOF B.08.00 (B8058.0)     |

## User Chromatograms

**Fragmentor Voltage** 90 **Collision Energy** 0 **Ionization Mode** ESI

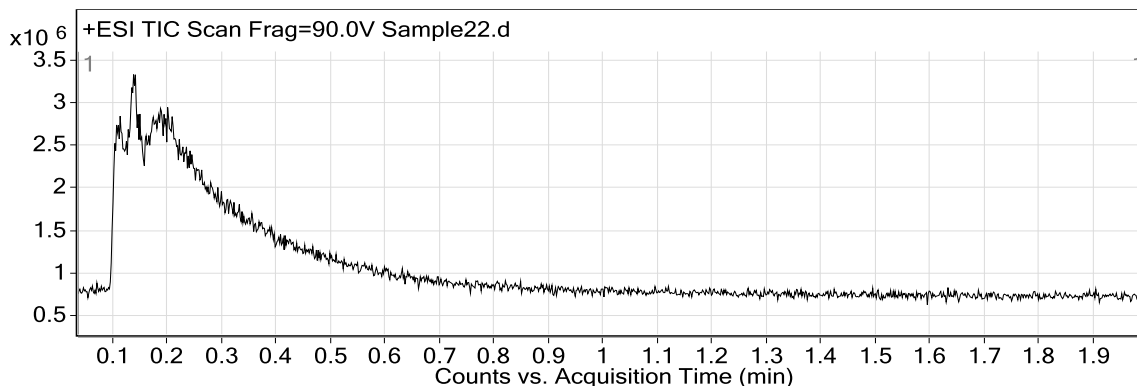

## User Spectra

**Fragmentor Voltage** 90 **Collision Energy** 0 **Ionization Mode** ESI

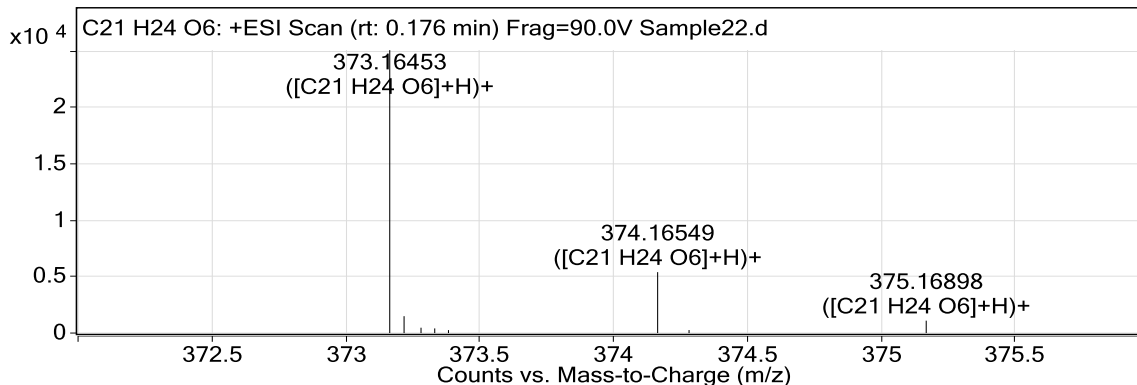

## Peak List

| m/z       | z | Abund    | Formula    | Ion    |
|-----------|---|----------|------------|--------|
| 102.12654 |   | 3092.1   |            |        |
| 104.10598 |   | 865.3    |            |        |
| 373.16453 | 1 | 25068.86 | C21 H24 O6 | (M+H)+ |
| 373.21812 |   | 1495.27  |            |        |
| 374.16549 | 1 | 5396.27  | C21 H24 O6 | (M+H)+ |
| 375.16898 | 1 | 1097.88  | C21 H24 O6 | (M+H)+ |
| 385.28871 |   | 1270.01  |            |        |
| 395.14443 | 1 | 6306.12  |            |        |
| 396.14973 | 1 | 1656.02  |            |        |

## Qualitative Analysis Report

|           |   |          |  |  |
|-----------|---|----------|--|--|
| 411.11921 | 1 | 97930.43 |  |  |
| 412.12301 | 1 | 20730.66 |  |  |
| 412.17823 | 1 | 1489.11  |  |  |
| 413.11952 | 1 | 8284.4   |  |  |
| 413.17055 | 1 | 720.02   |  |  |
| 413.2002  |   | 534.14   |  |  |
| 414.12206 | 1 | 1680.11  |  |  |
| 427.10985 |   | 700.55   |  |  |
| 429.31527 | 1 | 2830.74  |  |  |
| 430.31972 | 1 | 765.56   |  |  |
| 437.18839 |   | 646.13   |  |  |
| 445.30054 |   | 588.64   |  |  |
| 453.16405 | 1 | 1745.64  |  |  |
| 454.17028 | 1 | 586.97   |  |  |
| 457.35126 |   | 1053.38  |  |  |
| 473.34458 | 1 | 3311.63  |  |  |
| 474.34706 | 1 | 1209.93  |  |  |
| 489.32075 |   | 658.14   |  |  |
| 501.3699  | 1 | 1010.27  |  |  |
| 509.22095 |   | 1203.02  |  |  |
| 515.27689 |   | 561.76   |  |  |
| 517.36529 | 1 | 2166.27  |  |  |
| 518.36894 | 1 | 712.03   |  |  |
| 520.19196 |   | 623.48   |  |  |
| 525.19461 |   | 778.79   |  |  |
| 533.34181 |   | 863.07   |  |  |
| 536.16488 | 1 | 1393.76  |  |  |
| 545.39275 |   | 745.1    |  |  |
| 561.39124 | 1 | 2156.66  |  |  |
| 562.3956  | 1 | 717.82   |  |  |
| 577.36339 | 1 | 1225.15  |  |  |
| 578.21637 | 2 | 1184.26  |  |  |
| 578.71366 | 2 | 764.35   |  |  |
| 595.19049 |   | 803.05   |  |  |
| 605.41693 | 1 | 1409.42  |  |  |
| 606.42229 | 1 | 823.33   |  |  |
| 617.45157 |   | 561.52   |  |  |
| 621.39901 |   | 807.69   |  |  |
| 631.17007 | 1 | 1670.01  |  |  |
| 632.16871 | 1 | 685.38   |  |  |
| 633.45256 |   | 694      |  |  |
| 647.14078 | 1 | 2180.36  |  |  |
| 649.44325 |   | 924.01   |  |  |
| 665.42141 |   | 726.82   |  |  |
| 685.42957 | 1 | 759.37   |  |  |
| 693.47014 | 1 | 903.06   |  |  |
| 701.40737 | 1 | 959.38   |  |  |
| 721.49293 |   | 539.1    |  |  |
| 737.50746 |   | 644.5    |  |  |
| 767.28454 | 1 | 640.92   |  |  |
| 769.28162 | 1 | 530.9    |  |  |
| 783.26521 | 1 | 798.07   |  |  |



# Qualitative Analysis Report

## Formula Calculator Element Limits

| Element | Min | Max |
|---------|-----|-----|
| C       | 3   | 21  |
| H       | 0   | 24  |
| O       | 0   | 6   |

## Formula Calculator Results

| Formula    | Best | Mass      | Tgt Mass  | Diff (ppm) | Ion Species | Score |
|------------|------|-----------|-----------|------------|-------------|-------|
| C21 H24 O6 | TRUE | 372.15678 | 372.15729 | 1.36       | C21 H25 O6  | 93.31 |

--- End Of Report ---

# Qualitative Analysis Report

|                               |              |                      |                      |
|-------------------------------|--------------|----------------------|----------------------|
| <b>Data Filename</b>          | Sample23.d   | <b>Sample Name</b>   | Sample23             |
| <b>Sample Type</b>            | Sample       | <b>Position</b>      | P1-C5                |
| <b>Instrument Name</b>        | Instrument 1 | <b>User Name</b>     |                      |
| <b>Acq Method</b>             | ESI pos.m    | <b>Acquired Time</b> | 3/9/2022 11:27:53 AM |
| <b>IRM Calibration Status</b> | Success      | <b>DA Method</b>     | Default.m            |
| <b>Comment</b>                |              |                      |                      |

|                     |      |                       |                             |
|---------------------|------|-----------------------|-----------------------------|
| <b>Sample Group</b> |      | <b>Info.</b>          |                             |
| <b>Stream Name</b>  | LC 1 | <b>Acquisition SW</b> | 6200 series TOF/6500 series |
|                     |      | <b>Version</b>        | Q-TOF B.08.00 (B8058.0)     |

## User Chromatograms

**Fragmentor Voltage** 90 **Collision Energy** 0 **Ionization Mode** ESI

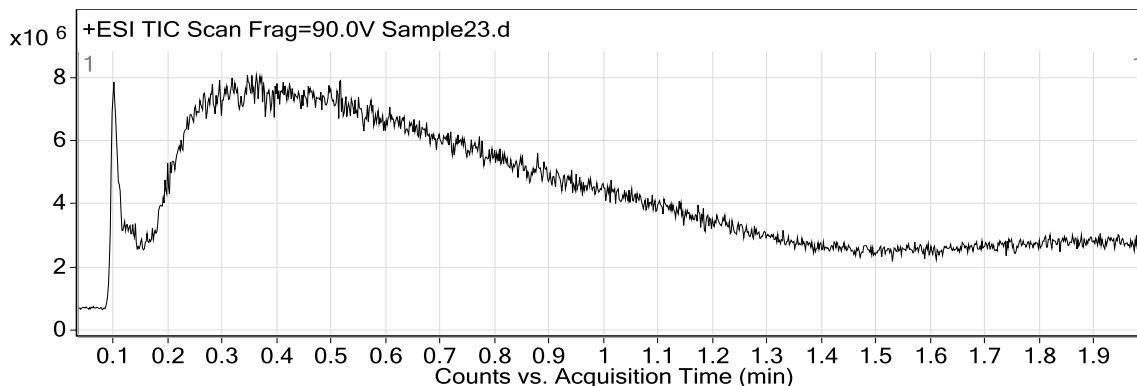

## User Spectra

**Fragmentor Voltage** 90 **Collision Energy** 0 **Ionization Mode** ESI

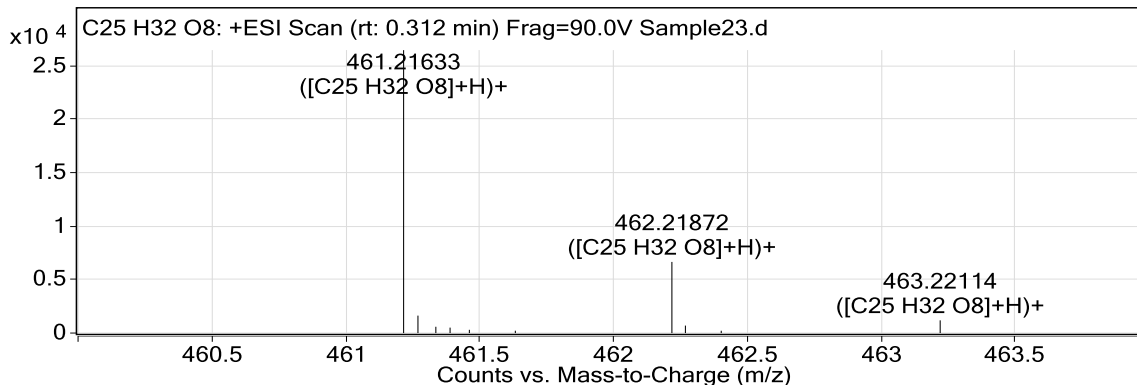

## Peak List

| m/z       | z | Abund   | Formula | Ion |
|-----------|---|---------|---------|-----|
| 102.12756 |   | 954.56  |         |     |
| 205.08455 |   | 767.62  |         |     |
| 237.11054 | 1 | 9804.36 |         |     |
| 237.14752 |   | 625.32  |         |     |
| 238.11224 | 1 | 1126.47 |         |     |
| 281.13581 |   | 1308.26 |         |     |
| 385.16381 | 1 | 2616.46 |         |     |
| 386.16906 | 1 | 835.25  |         |     |
| 397.16219 | 1 | 1528.55 |         |     |

## Qualitative Analysis Report

|            |   |           |            |        |
|------------|---|-----------|------------|--------|
| 429.18844  | 1 | 8317.57   |            |        |
| 430.19378  | 1 | 2352.27   |            |        |
| 451.16577  |   | 763.48    |            |        |
| 461.21633  | 1 | 26466.72  | C25 H32 O8 | (M+H)+ |
| 461.26991  | 1 | 1631.11   |            |        |
| 461.33679  |   | 589.07    |            |        |
| 462.21872  | 1 | 6653.69   | C25 H32 O8 | (M+H)+ |
| 462.2693   | 1 | 698.24    |            |        |
| 463.22114  | 1 | 1189.22   | C25 H32 O8 | (M+H)+ |
| 480.18488  | 2 | 573.4     |            |        |
| 483.11696  |   | 616.28    |            |        |
| 483.20302  |   | 236415.38 |            |        |
| 483.33085  |   | 14931.27  |            |        |
| 483.38371  |   | 27465.53  |            |        |
| 483.44766  |   | 17272.25  |            |        |
| 484.12617  |   | 2645.89   |            |        |
| 484.20129  | 1 | 160985.06 |            |        |
| 485.20414  | 1 | 27926.23  |            |        |
| 485.26394  |   | 2045.43   |            |        |
| 485.34469  |   | 907.85    |            |        |
| 485.38775  |   | 1029.93   |            |        |
| 485.44932  |   | 518.54    |            |        |
| 486.20487  | 1 | 3627.31   |            |        |
| 495.19694  | 1 | 10442.29  |            |        |
| 495.25386  |   | 854.04    |            |        |
| 496.19785  | 1 | 2429.02   |            |        |
| 499.17151  | 1 | 139546.89 |            |        |
| 500.17535  | 1 | 34313.3   |            |        |
| 500.23787  | 1 | 2283.13   |            |        |
| 500.30505  | 1 | 908.14    |            |        |
| 500.36456  | 1 | 886.9     |            |        |
| 501.17258  | 1 | 12858.84  |            |        |
| 501.2277   | 1 | 1198.03   |            |        |
| 501.26128  |   | 657.14    |            |        |
| 502.17339  | 1 | 2718.24   |            |        |
| 511.1717   | 1 | 4810.56   |            |        |
| 512.16666  | 1 | 975.3     |            |        |
| 513.1729   | 1 | 713.08    |            |        |
| 515.18344  |   | 737.41    |            |        |
| 527.22212  | 1 | 2074.86   |            |        |
| 528.2233   | 1 | 636.1     |            |        |
| 568.17165  | 1 | 1046.76   |            |        |
| 702.30366  | 2 | 1192.86   |            |        |
| 702.8083   | 2 | 1052.7    |            |        |
| 703.30753  | 2 | 572.2     |            |        |
| 710.29019  | 2 | 2349.73   |            |        |
| 710.79873  | 2 | 2267.92   |            |        |
| 711.29735  | 2 | 1377.68   |            |        |
| 711.79879  | 2 | 542.67    |            |        |
| 1005.36882 | 1 | 736.89    |            |        |
| 1006.38281 | 1 | 517.01    |            |        |
| 1022.36327 | 1 | 1132.01   |            |        |

# Qualitative Analysis Report

## Formula Calculator Element Limits

| Element | Min | Max |
|---------|-----|-----|
| C       | 3   | 25  |
| H       | 0   | 32  |
| O       | 0   | 8   |

## Formula Calculator Results

| Formula    | Best | Mass      | Tgt Mass  | Diff (ppm) | Ion Species | Score |
|------------|------|-----------|-----------|------------|-------------|-------|
| C25 H32 O8 | TRUE | 460.20882 | 460.20972 | 1.96       | C25 H33 O8  | 96    |

--- End Of Report ---

# Qualitative Analysis Report

|                               |              |                      |                      |
|-------------------------------|--------------|----------------------|----------------------|
| <b>Data Filename</b>          | Sample25.d   | <b>Sample Name</b>   | Sample25             |
| <b>Sample Type</b>            | Sample       | <b>Position</b>      | P1-C7                |
| <b>Instrument Name</b>        | Instrument 1 | <b>User Name</b>     |                      |
| <b>Acq Method</b>             | ESI pos.m    | <b>Acquired Time</b> | 3/9/2022 11:33:16 AM |
| <b>IRM Calibration Status</b> | Success      | <b>DA Method</b>     | Default.m            |
| <b>Comment</b>                |              |                      |                      |

|                     |      |                       |                             |
|---------------------|------|-----------------------|-----------------------------|
| <b>Sample Group</b> |      | <b>Info.</b>          |                             |
| <b>Stream Name</b>  | LC 1 | <b>Acquisition SW</b> | 6200 series TOF/6500 series |
|                     |      | <b>Version</b>        | Q-TOF B.08.00 (B8058.0)     |

## User Chromatograms

**Fragmentor Voltage** 90 **Collision Energy** 0 **Ionization Mode** ESI

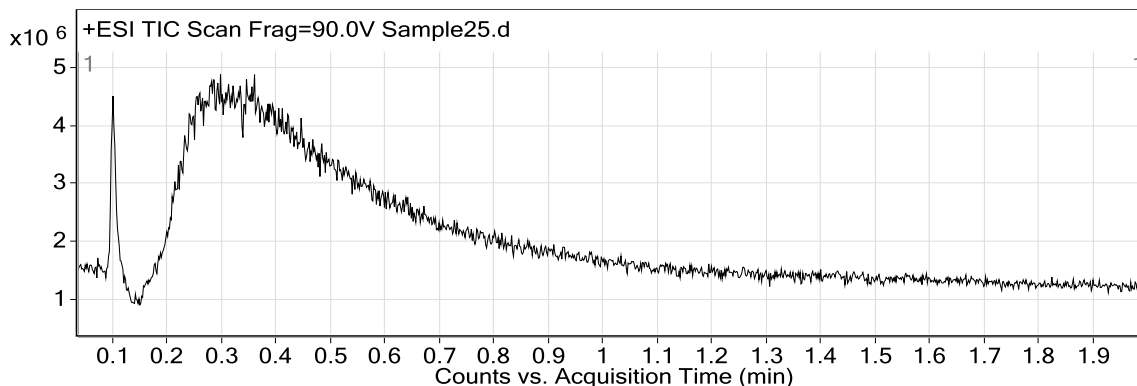

## User Spectra

**Fragmentor Voltage** 90 **Collision Energy** 0 **Ionization Mode** ESI

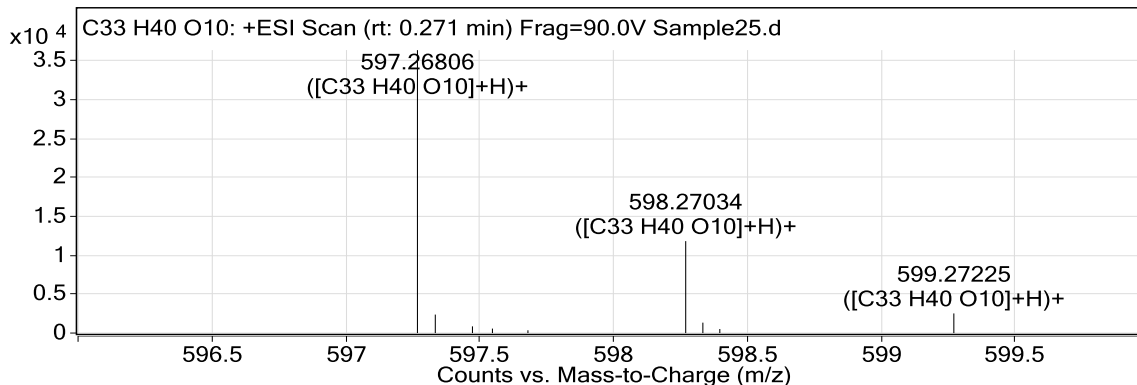

## Peak List

| m/z       | z | Abund   | Formula | Ion |
|-----------|---|---------|---------|-----|
| 102.1271  |   | 2297.44 |         |     |
| 307.21571 |   | 862.26  |         |     |
| 318.11209 | 2 | 1327.8  |         |     |
| 357.13079 | 1 | 2475.73 |         |     |
| 373.16206 | 1 | 8891.82 |         |     |
| 373.22441 |   | 567.91  |         |     |
| 374.16517 | 1 | 2232.77 |         |     |
| 389.15789 | 1 | 3950.12 |         |     |
| 390.15919 | 1 | 857.63  |         |     |

## Qualitative Analysis Report

|            |   |           |             |        |
|------------|---|-----------|-------------|--------|
| 417.18988  |   | 756.21    |             |        |
| 461.21412  |   | 822.19    |             |        |
| 471.16216  | 1 | 2205.17   |             |        |
| 472.16148  | 1 | 572.8     |             |        |
| 483.19609  | 1 | 4191.5    |             |        |
| 484.20196  | 1 | 1046.46   |             |        |
| 485.17623  | 1 | 1495.01   |             |        |
| 486.18016  | 1 | 628.99    |             |        |
| 499.16681  |   | 1101.09   |             |        |
| 521.21143  |   | 829.21    |             |        |
| 565.24068  | 1 | 3571.54   |             |        |
| 566.24156  | 1 | 1005.44   |             |        |
| 597.26806  | 1 | 36340.77  | C33 H40 O10 | (M+H)+ |
| 597.33474  | 1 | 2372.61   |             |        |
| 597.47361  |   | 858.78    |             |        |
| 597.54827  |   | 573.9     |             |        |
| 598.27034  | 1 | 11806.16  | C33 H40 O10 | (M+H)+ |
| 598.33448  | 1 | 1337.37   |             |        |
| 599.27225  | 1 | 2520.5    | C33 H40 O10 | (M+H)+ |
| 609.25854  |   | 869.81    |             |        |
| 616.73901  | 2 | 601.78    |             |        |
| 619.25012  | 1 | 196580.02 |             |        |
| 620.2526   | 1 | 73278.53  |             |        |
| 620.45894  | 1 | 1902.07   |             |        |
| 621.25503  | 1 | 13952.32  |             |        |
| 621.32465  |   | 1178.26   |             |        |
| 622.25521  | 1 | 1856      |             |        |
| 631.24868  | 1 | 1924.43   |             |        |
| 632.25202  | 1 | 1025.18   |             |        |
| 633.22979  | 1 | 736.29    |             |        |
| 635.22313  | 1 | 67688.44  |             |        |
| 636.22588  | 1 | 24151.25  |             |        |
| 636.29797  |   | 1628.41   |             |        |
| 636.36857  |   | 699.58    |             |        |
| 636.44242  |   | 686.65    |             |        |
| 637.22617  | 1 | 8087.96   |             |        |
| 638.22383  | 1 | 1826.44   |             |        |
| 642.32138  |   | 702.01    |             |        |
| 647.22534  | 1 | 1862.6    |             |        |
| 651.23237  |   | 1239.53   |             |        |
| 653.25141  | 1 | 4070.24   |             |        |
| 654.26234  | 1 | 1385.28   |             |        |
| 669.23327  |   | 860       |             |        |
| 670.35192  | 1 | 1084.56   |             |        |
| 681.21807  | 1 | 964.17    |             |        |
| 682.22442  | 1 | 615.62    |             |        |
| 698.38654  | 1 | 1486.59   |             |        |
| 699.39082  | 1 | 804       |             |        |
| 704.22467  | 1 | 1200.19   |             |        |
| 726.4182   |   | 672.49    |             |        |
| 914.36804  | 2 | 729.12    |             |        |
| 1215.50542 | 1 | 602.54    |             |        |

# Qualitative Analysis Report

## Formula Calculator Element Limits

| Element | Min | Max |
|---------|-----|-----|
| C       | 3   | 33  |
| H       | 0   | 40  |
| O       | 0   | 10  |

## Formula Calculator Results

| Formula     | Best | Mass      | Tgt Mass  | Diff (ppm) | Ion Species | Score |
|-------------|------|-----------|-----------|------------|-------------|-------|
| C33 H40 O10 | TRUE | 596.26039 | 596.26215 | 2.95       | C33 H41 O10 | 91.74 |

--- End Of Report ---
